# Supplementary material
Source: Research Square preprint supplement (doi:10.21203/rs.3.rs-9922479/v1)
Supplement: Supplementary file 1 [file 4a5eded4c1406ab1073e28a4.pdf]

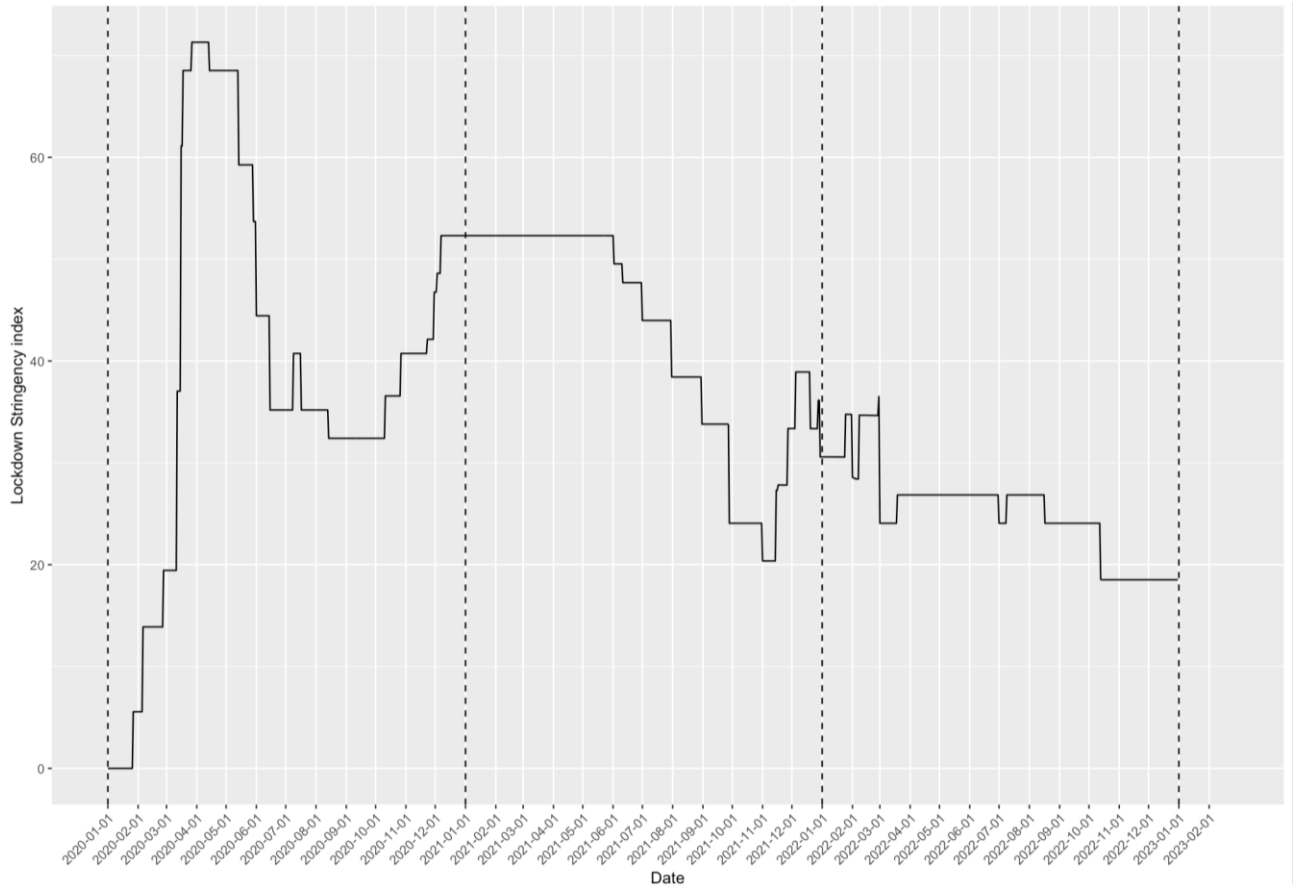

1  
 2 **Figure S1. Oxford COVID-19 Government Response Tracker (OxCGRT) stringency**  
 3 **index in Finland from 1 January 2020 to 1 January 2023.** The stringency index (y-axis)  
 4 reflects the severity of government-imposed restrictions (lockdown stringency index),  
 5 including measures such as school closures, workplace closures, and travel restrictions.  
 6 Higher values indicate more stringent public health measures. Data were obtained from the  
 7 Oxford COVID-19 Government Response Tracker (OxCGRT).

8

9

10

11

12

13

14

15

16

17

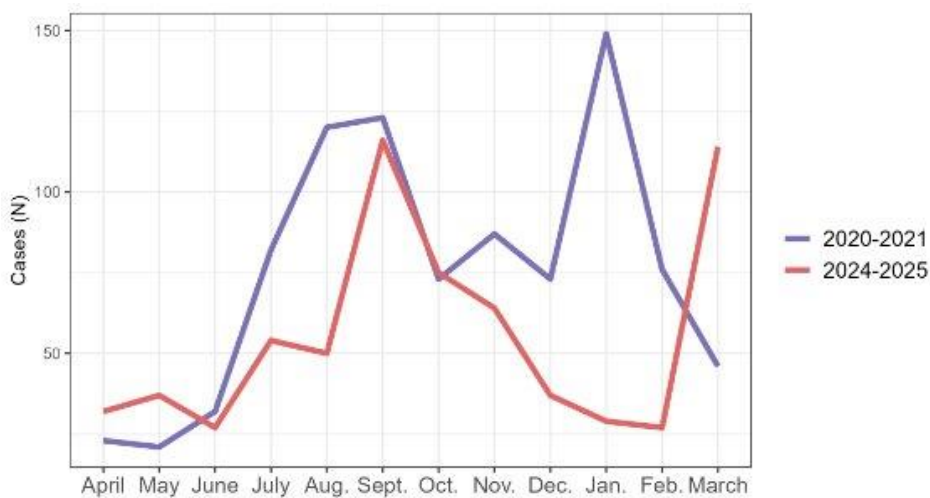

18 **Figure S2. Monthly diagnosed rhinovirus cases during 2020-21 and 2024-25 according**  
19 **to Finnish National Infectious Diseases Register ([sampo.thl.fi](https://sampo.thl.fi)).**
