# Supplementary material
Source: Research Square preprint supplement (doi:10.21203/rs.3.rs-9922479/v1)
Supplement: Supplementary file 1 [file 36b2edd858bf0e965b7fa7f7.xlsx]

## Sheet: TableS1
Table S1. Storage-associated changes in viral genome-type abundances in wastewater.
genome_type	n_samples_2020_21	n_samples_2024_25	median_log_rel_2020_21	median_log_rel_2024_25	delta_median	cliffs_delta	p_value	FDR_q_value
ssDNA(+/-)	60	60	-0.497302	-0.955016	-0.457714	0.855	6.74596e-16	4.72217e-15
ssDNA(-)	60	58	-1.55455	-1.97964	-0.425089	0.662069	5.69787e-10	1.99425e-09
ssRNA(+)	60	60	-0.761782	-0.553447	0.208335	-0.404444	0.000134328	0.000313433
dsRNA	60	60	-1.16665	-0.657351	0.509299	-0.384444	0.000284044	0.000497076
ssRNA(-)	5	36	-4.32808	-3.10543	1.22265	-0.866667	0.000525755	0.000736057
ssRNA-RT	59	58	-2.5485	-2.70689	-0.158389	0.308591	0.0040323	0.00470435
dsDNA	60	60	-0.521948	-0.497328	0.0246206	0.0305556	0.774839	0.774839

## Sheet: TableS2
Table S2. Storage-associated changes in non-human viral genome-type abundances
genome_type	n_samples_2020_21	n_samples_2024_25	median_log_rel_2020_21	median_log_rel_2024_25	delta_median	cliffs_delta	p_value	FDR_q_value
ssDNA(+/-)	60	60	-0.378702	-0.582683	-0.203982	0.41	0.000108447	0.000650683
ssRNA-RT	59	58	-1.92277	-1.65965	0.263127	-0.246639	0.0215747	0.0647241
ssRNA(+)	60	60	-0.484561	-0.407349	0.0772128	-0.192222	0.0697694	0.139539
dsDNA	60	60	-2.3121	-2.03831	0.27379	-0.19	0.0730673	0.109601
dsRNA	60	60	-1.18441	-0.993429	0.190977	-0.0533333	0.616199	0.739438
ssDNA(-)	60	56	-1.10139	-1.10457	-0.00317399	0.0160714	0.883597	0.883597

## Sheet: TableS3
TableS3: Kruskal-Wallsi test for observed species, Shannon and Simpson diversity
Data	Response	df	χ^2	p-value
2020-2021 and 2024-2025	Species count	4	8.735	0.06806
	Shannon index	4	3.136	0.5354
	Simpson index (1/D)	4	3.505	0.4771
2020-2021	Species count	4	10.416	0.03397
	Shannon index	4	13.381	0.009557
	Simpson index (1/D)	4	12.914	0.0117
2024-2025	Species count	4	2.596	0.6275
	Shannon index	4	0.70874	0.9502
	Simpson index (1/D)	4	0.72623	0.9481

## Sheet: TableS4
Table S4: Pairwise Mann-Whitney U-tests for the number of observed species, Shannon and Simpson diversity between cities using 2020-2021 data
variable	City1	City2	statistic	p_value	q_value
shannon_index	Helsinki	Kuopio	75	0.887386	0.887386
	Helsinki	Oulu	63	0.629726	0.699695
	Helsinki	Tampere	89	0.347358	0.496226
	Helsinki	Turku	31	0.0172712	0.051223
	Kuopio	Oulu	60	0.513723	0.642153
	Kuopio	Tampere	93	0.241524	0.40254
	Kuopio	Turku	31	0.0172712	0.051223
	Oulu	Tampere	103	0.0780243	0.156049
	Oulu	Turku	32	0.0204892	0.051223
	Tampere	Turku	17	0.0008579	0.0085794
simpson_index_1/D	Helsinki	Kuopio	68	0.842836	0.842836
	Helsinki	Oulu	55	0.347358	0.434197
	Helsinki	Tampere	83	0.551167	0.612408
	Helsinki	Turku	32	0.0204892	0.102446
	Kuopio	Oulu	54	0.318585	0.434197
	Kuopio	Tampere	98	0.143168	0.238613
	Kuopio	Turku	35	0.0332414	0.110805
	Oulu	Tampere	107	0.044902	0.112255
	Oulu	Turku	39	0.0596571	0.119314
	Tampere	Turku	18	0.0011146	0.0111458
species_count	Helsinki	Kuopio	85	0.469616	0.58702
	Helsinki	Oulu	107.5	0.0431262	0.107816
	Helsinki	Tampere	111	0.0258716	0.107816
	Helsinki	Turku	65	0.707211	0.78579
	Kuopio	Oulu	102.5	0.0827953	0.165591
	Kuopio	Tampere	100	0.111335	0.185559
	Kuopio	Turku	57	0.401787	0.573981
	Oulu	Tampere	72	1	1
	Oulu	Turku	34	0.0302028	0.107816
	Tampere	Turku	36	0.0399695	0.107816

## Sheet: TableS5
TableS5: Bray-Curtis beta diversity. PERMANOVA on species level RPKMF values, with 999 permutations
Data	Term	df	Sum of sqs	R2	F	p-value
2020-2021 and 2024-2025	City	4	1.3878	0.04955	1.4988	0.058
2020-2021	City	4	1.8872	0.2068	3.5849	0.001
2024-2025	City	4	0.8948	0.07488	1.1129	0.319
2020-2021 and 2024-2025	Year	1	6.932	0.2475	38.811	0.001

## Sheet: TableS6_MaAsLin_prevalence
feature	metadata	value	name	coef	null_hypothesis	stderr	pval_individual	qval_individual	pval_joint	qval_joint	error	model	N	N_not_zero	qval_individual_readj
s__Gammapapillomavirus 4	Year_cat	2024-2025	Year_cat2024-2025	-4.40464160555741	0	0.638648338255669	5.31800953213611e-12	7.14450577028807e-10	1.06360190642439e-11	6.46045734545278e-10	NA	prevalence	120	58	4.84534300910494e-10
s__Mupapillomavirus 2	Year_cat	2024-2025	Year_cat2024-2025	-3.71753511709294	0	0.54097373407436	6.33378171124829e-12	7.14450577028807e-10	1.26675634224564e-11	6.46045734545278e-10	NA	prevalence	120	61	4.84534300910494e-10
s__Gammapapillomavirus 12	Year_cat	2024-2025	Year_cat2024-2025	-4.06884557012932	0	0.634077037780916	1.39024473022927e-10	8.71220030943675e-09	2.78048946026525e-10	9.24320380235599e-09	NA	prevalence	120	51	7.09024812416928e-09
s__Gammapapillomavirus 7	Year_cat	2024-2025	Year_cat2024-2025	-3.48911885813657	0	0.558450062401086	4.16109373047702e-10	2.13350623999003e-08	8.32218745922256e-10	2.12215780210175e-08	NA	prevalence	120	53	1.59161835190746e-08
s__Betapapillomavirus 3	Year_cat	2024-2025	Year_cat2024-2025	-5.45556756728794	0	0.939488681223741	6.36196012273252e-09	2.76011193017011e-07	1.27239202049905e-08	2.99501506363622e-07	NA	prevalence	120	63	1.94675979755615e-07
s__Deltapolyomavirus sextihominis	Year_cat	2024-2025	Year_cat2024-2025	-3.18940287811643	0	0.572230120165038	2.49475523345918e-08	9.3802796778065e-07	4.9895104046803e-08	1.01786012255478e-06	NA	prevalence	120	74	6.36162584532091e-07
s__Sapovirus Sapozj-9	Year_cat	2024-2025	Year_cat2024-2025	3.36937661557613	0	0.634376559363481	1.088343075591e-07	3.73005643705682e-06	2.17668603273293e-07	4.04750782118898e-06	NA	prevalence	120	40	2.37880700807747e-06
s__Alphapapillomavirus 3	Year_cat	2024-2025	Year_cat2024-2025	-2.52412749332184	0	0.477850675272898	1.27605788311758e-07	3.99831470043507e-06	2.55211560340278e-07	4.33859652578472e-06	NA	prevalence	120	50	2.44046070146237e-06
s__Mupapillomavirus 1	Year_cat	2024-2025	Year_cat2024-2025	-4.89743512094151	0	0.940698430592365	1.92778963234152e-07	5.72249132968747e-06	3.85557889304576e-07	6.20951126985265e-06	NA	prevalence	120	76	3.27724237498058e-06
s__Gammapapillomavirus 5	Year_cat	2024-2025	Year_cat2024-2025	-3.23522153114075	0	0.647695701368951	5.88444745786214e-07	1.65941418311712e-05	1.17688914530521e-06	1.80064039231697e-05	NA	prevalence	120	34	9.00320461052907e-06
s__Alphapapillomavirus 2	Year_cat	2024-2025	Year_cat2024-2025	-2.14175715451419	0	0.431664915969598	6.99077646799266e-07	1.87752282283232e-05	1.39815480488898e-06	2.03731128712394e-05	NA	prevalence	120	61	9.72353454184434e-06
s__HMO Astrovirus A	Year_cat	2024-2025	Year_cat2024-2025	2.56507315267015	0	0.52167575300688	8.78861644223171e-07	2.25308166973577e-05	1.75772251604855e-06	2.44483222686753e-05	NA	prevalence	120	80	1.12054859638454e-05
s__Gammapapillomavirus 15	Year_cat	2024-2025	Year_cat2024-2025	-3.02004228736808	0	0.620131249879278	1.1159542494991e-06	2.62249248632288e-05	2.23190725364431e-06	2.96940704180503e-05	NA	prevalence	120	36	1.21957857266687e-05
s__Betapapillomavirus 4	Year_cat	2024-2025	Year_cat2024-2025	-2.25476748817927	0	0.481575194403732	2.83996152435427e-06	5.93236407309558e-05	5.67991498332708e-06	6.95221593959234e-05	NA	prevalence	120	41	2.89676075484136e-05
s__Gammapapillomavirus sp.	Year_cat	2024-2025	Year_cat2024-2025	-3.41269275090095	0	0.736112374484351	3.55039187310856e-06	7.15150363011867e-05	7.10077114093467e-06	8.35706141971542e-05	NA	prevalence	120	29	3.39506222866006e-05
s__Gammapapillomavirus 9	Year_cat	2024-2025	Year_cat2024-2025	-4.09747480156843	0	0.891795471301731	4.33507129665035e-06	8.43096624589929e-05	8.67012380045755e-06	9.82614030718522e-05	NA	prevalence	120	33	3.90156416698531e-05
s__Alphapapillomavirus 6	Year_cat	2024-2025	Year_cat2024-2025	-2.30771851963281	0	0.504246175723602	4.72658915068988e-06	8.88598760329697e-05	9.45315596073476e-06	0.000103309490142316	NA	prevalence	120	64	4.0176007780864e-05
s__Alphapapillomavirus 10	Year_cat	2024-2025	Year_cat2024-2025	-1.7915470604352	0	0.417949387383668	1.81496502304626e-05	0.000310194022120634	3.62989710511217e-05	0.000358305972311073	NA	prevalence	120	62	0.000138844824263039
s__Mamastrovirus 9	Year_cat	2024-2025	Year_cat2024-2025	1.71889818412644	0	0.413617511385664	3.24197474084684e-05	0.000507909376066004	6.48384437769147e-05	0.000601229205931391	NA	prevalence	120	69	0.000236201016833127
s__Betapapillomavirus 5	Year_cat	2024-2025	Year_cat2024-2025	-2.57536918578135	0	0.638205049272729	5.45251687986998e-05	0.000831140410877478	0.000109047364603367	0.000953385530532294	NA	prevalence	120	26	0.000379197764827321
s__Deltapolyomavirus septihominis	Year_cat	2024-2025	Year_cat2024-2025	-2.14682666530071	0	0.53519878638323	6.03930760129777e-05	0.000880427822687495	0.000120782504702325	0.00100620156235813	NA	prevalence	120	31	0.000382368538606165
s__Human respiratory circular DNA virus	Year_cat	2024-2025	Year_cat2024-2025	-1.79879635252903	0	0.448647994723857	6.0880647313497e-05	0.000880427822687495	0.000121757588173777	0.00100620156235813	NA	prevalence	120	72	0.000382368538606165
s__Gammapapillomavirus 10	Year_cat	2024-2025	Year_cat2024-2025	-3.48090203305738	0	0.869519271315159	6.24785193800924e-05	0.000880947123259303	0.000124953135194801	0.00100620156235813	NA	prevalence	120	29	0.000382368538606165
s__Alphapapillomavirus 4	Year_cat	2024-2025	Year_cat2024-2025	-3.1107910629899	0	0.795486158049662	9.20849161126168e-05	0.00120781145784921	0.000184161352593458	0.00140883434733995	NA	prevalence	120	98	0.000541884314047322
s__Salivirus FHB	Year_cat	2024-2025	Year_cat2024-2025	1.62935487741164	0	0.418707675481838	9.96715587017942e-05	0.00127760816154118	0.000199333182983974	0.00148770619495357	NA	prevalence	120	72	0.000564805499310167
s__Gammapapillomavirus 24	Year_cat	2024-2025	Year_cat2024-2025	-2.78368364688532	0	0.724632657109135	0.00012227972028225	0.0015325724942042	0.000244544488234508	0.00178168127142285	NA	prevalence	120	23	0.000668171328685152
s__Enterovirus A	Year_cat	2024-2025	Year_cat2024-2025	1.58282774079727	0	0.416956339000949	0.000146962112190652	0.00180188328859843	0.000293902626518886	0.00209149310964602	NA	prevalence	120	55	0.000766090486845311
s__Human papillomavirus	Year_cat	2024-2025	Year_cat2024-2025	-5.80058188837468	0	1.53020758061183	0.000150213820950061	0.00180256585140073	2.58498119016036e-08	5.65003031563621e-07	NA	prevalence	120	84	0.000766090486845311
s__Alphapapillomavirus 7	Year_cat	2024-2025	Year_cat2024-2025	-1.56252947816986	0	0.41517267158726	0.000167507931676204	0.00196602983465361	0.000334987804445233	0.00232278437766692	NA	prevalence	120	52	0.000826732695047071
s__Betacoronavirus 1	Year_cat	2024-2025	Year_cat2024-2025	2.0583445256847	0	0.572583985165426	0.000324598155121331	0.00352064152862367	0.000649090946280354	0.00405350672575078	NA	prevalence	120	26	0.00155198492917386
s__Severe acute respiratory syndrome-related coronavirus	Year_cat	2024-2025	Year_cat2024-2025	1.48827924921529	0	0.415319717042068	0.000339080038588434	0.00360832342950711	0.0006780451019043	0.00414963602365432	NA	prevalence	120	74	0.00157209836072819
s__Protoparvovirus primate3	Year_cat	2024-2025	Year_cat2024-2025	-2.29410227866874	0	0.643611661384324	0.000364661647202177	0.00380868831522274	0.000729190316287415	0.00437514189772449	NA	prevalence	120	22	0.0016409774124098
s__Betapapillomavirus 2	Year_cat	2024-2025	Year_cat2024-2025	-5.5563658915204	0	1.62372901031704	0.00062167211189037	0.00615128194923103	2.25153229393969e-13	2.29656293981848e-11	NA	prevalence	120	98	0.0027175952319779
s__Gammapapillomavirus 1	Year_cat	2024-2025	Year_cat2024-2025	-5.04655870459547	0	1.50398757828368	0.000792352956519231	0.00770494943925597	2.2486154562161e-07	4.04750782118898e-06	NA	prevalence	120	95	0.00336750006520673
s__Gammapapillomavirus unclassified	Year_cat	2024-2025	Year_cat2024-2025	-2.35978408115565	0	0.72314907720534	0.00110159590673946	0.00986190621271519	0.00220197829993718	0.0120322385675139	NA	prevalence	120	19	0.00455524793867939
s__Human parechovirus 1B	Year_cat	2024-2025	Year_cat2024-2025	4.63311379869784	0	1.44629039184203	0.00135793298676379	0.0116041546141633	0.00135793298676379	0.00784014139527773	NA	prevalence	120	30	0.00541204925716321
s__Gammapapillomavirus 21	Year_cat	2024-2025	Year_cat2024-2025	-2.83691984201327	0	0.886842989622426	0.00137954196751219	0.0116128607414459	0.00275718079898424	0.0140616220748196	NA	prevalence	120	18	0.00541204925716321
s__Gammapapillomavirus 20	Year_cat	2024-2025	Year_cat2024-2025	-2.83302805285202	0	0.892914517355305	0.00150982969293866	0.0123854007344629	0.00301737980017564	0.0149455061800188	NA	prevalence	120	17	0.00565441426888621
s__Human mastadenovirus E	Year_cat	2024-2025	Year_cat2024-2025	2.80717128594846	0	0.885054469271912	0.00151523519623748	0.0123854007344629	0.00302817445477504	0.0149455061800188	NA	prevalence	120	23	0.00565441426888621
s__Nupapillomavirus 1	Year_cat	2024-2025	Year_cat2024-2025	-2.77290274924067	0	0.877925020271549	0.00158597828317047	0.0127784535958307	0.00316944123922626	0.0153944288762418	NA	prevalence	120	19	0.0057594953267632
s__Gammapapillomavirus 3	Year_cat	2024-2025	Year_cat2024-2025	-2.26069043477999	0	0.717105997618459	0.0016186816931426	0.0128582602103158	0.00323474325586148	0.0154545936128114	NA	prevalence	120	19	0.0057594953267632
s__Alphapapillomavirus 14	Year_cat	2024-2025	Year_cat2024-2025	-1.91649555739511	0	0.63260117717019	0.00244920075737033	0.0186668814480658	0.00489240293039076	0.0223444074134265	NA	prevalence	120	20	0.00832728257505912
s__Betapapillomavirus 1	Year_cat	2024-2025	Year_cat2024-2025	-4.82533930483523	0	1.61501625674699	0.00280996935684531	0.0208529304902731	6.47482067950909e-11	2.83042161132826e-09	NA	prevalence	120	107	0.00934620242602897
s__Respirovirus pneumoniae	Year_cat	2024-2025	Year_cat2024-2025	4.33605558489235	0	1.47726144651651	0.0033333437204103	0.023797542510271	0.0033333437204103	0.0154545936128114	NA	prevalence	120	18	0.0108510976430378
s__Gammapapillomavirus 27	Year_cat	2024-2025	Year_cat2024-2025	-2.10357685672662	0	0.731261816071175	0.00401934088239854	0.0273121476828045	0.00802252666366816	0.0331742318794927	NA	prevalence	120	16	0.0128116490626453
s__Gammapapillomavirus 11	Year_cat	2024-2025	Year_cat2024-2025	-3.98153501551386	0	1.45007223508883	0.00603728543177435	0.0395933602734969	0.00603728543177435	0.0271677844429846	NA	prevalence	120	19	0.0188511157359485
s__Alphapolyomavirus octihominis	Year_cat	2024-2025	Year_cat2024-2025	-3.98890015892027	0	1.46163252119362	0.00635128653061644	0.0411738575088238	0.00635128653061644	0.0278889194201197	NA	prevalence	120	16	0.0194349367836863
s__Gammapapillomavirus 19	Year_cat	2024-2025	Year_cat2024-2025	-3.90219525862445	0	1.45870287165881	0.00747040287587418	0.0473405305841915	0.00747040287587418	0.0317492122224653	NA	prevalence	120	16	0.0224112086276225
s__Alphapapillomavirus 5	Year_cat	2024-2025	Year_cat2024-2025	-1.3027468997965	0	0.489710842259574	0.0078085685171684	0.048933696040922	0.0155561632920495	0.0601106125359681	NA	prevalence	120	27	0.0229752112139763
s__Astrovirus MLB2	Year_cat	2024-2025	Year_cat2024-2025	1.08391270421228	0	0.408624518584677	0.00798771818596379	0.049506297328391	0.0159116327301092	0.0601106125359681	NA	prevalence	120	65	0.0230588845745747
s__Gammapapillomavirus 18	Year_cat	2024-2025	Year_cat2024-2025	-1.89959499705978	0	0.73844255369128	0.0100986104061423	0.0598745842667482	0.0200952388801496	0.0712462522024021	NA	prevalence	120	14	0.0285460324788361
s__Gammapapillomavirus 2	Year_cat	2024-2025	Year_cat2024-2025	-2.32786741102425	0	0.906883967716902	0.0102616456623267	0.0598745842667482	0.0204179899529542	0.0712462522024021	NA	prevalence	120	12	0.0285460324788361
s__Gyrovirus homsa3	Year_cat	2024-2025	Year_cat2024-2025	-1.15727549532948	0	0.457766249808965	0.0114684080598796	0.0660018586303275	0.0228052917363313	0.0775379919035264	NA	prevalence	120	32	0.0313333291635996
s__Gammapapillomavirus 13	Year_cat	2024-2025	Year_cat2024-2025	-3.65852918082572	0	1.45472684168585	0.011905764342313	0.0678267786774194	0.011905764342313	0.0479363669572075	NA	prevalence	120	15	0.0319575779714717
s__Human coronavirus NL63	Year_cat	2024-2025	Year_cat2024-2025	3.64994300696747	0	1.45706474675422	0.0122452387448032	0.0690631465206901	0.0122452387448032	0.0486628968299972	NA	prevalence	120	18	0.0323020953095671
s__Deltapolyomavirus undecihominis	Year_cat	2024-2025	Year_cat2024-2025	-3.55581784891431	0	1.47324199383558	0.0157957640722594	0.084845818445279	0.0157957640722594	0.0601106125359681	NA	prevalence	120	11	0.0402791983842615
s__Orthopneumovirus hominis	Year_cat	2024-2025	Year_cat2024-2025	2.16931175482566	0	0.905076413541196	0.0165377213281594	0.0879931587649236	0.032801946429591	0.104556204244321	NA	prevalence	120	16	0.0414798584132523
s__Betapolyomavirus hominis	Year_cat	2024-2025	Year_cat2024-2025	-4.10095028514567	0	1.71772252308449	0.0169664184730076	0.088602407581262	8.42201863786614e-11	3.2214221289838e-09	NA	prevalence	120	114	0.0418687423608091
s__Enterovirus D	Year_cat	2024-2025	Year_cat2024-2025	2.11951792809053	0	0.900652121397056	0.0186068763080182	0.0954025294338388	0.0368675367700945	0.11169768565989	NA	prevalence	120	13	0.0450289548557011
s__Rhinovirus A	Year_cat	2024-2025	Year_cat2024-2025	0.943557240892127	0	0.401724333966704	0.0188356412468292	0.0957054203892945	0.0161638095060796	0.0603186062056141	NA	prevalence	120	76	0.0450289548557011
s__Human coronavirus 229E	Year_cat	2024-2025	Year_cat2024-2025	3.45584485096881	0	1.47735169846946	0.0193242532199281	0.0973114180003522	0.0193242532199281	0.0695673115917412	NA	prevalence	120	10	0.0454863191176769
s__Metapneumovirus hominis	Year_cat	2024-2025	Year_cat2024-2025	2.08976144882439	0	0.906499406400823	0.0211492609626769	0.101244661767194	0.0418512306860864	0.118762265602273	NA	prevalence	120	11	0.0482960735416353
s__Roseolovirus humanbeta6a	Year_cat	2024-2025	Year_cat2024-2025	-2.09210735574926	0	0.905445665203766	0.0208558994903898	0.101244661767194	0.0412768304372263	0.118762265602273	NA	prevalence	120	11	0.0482960735416353
s__Betainfluenzavirus influenzae	Year_cat	2024-2025	Year_cat2024-2025	3.34215305653843	0	1.4656031655349	0.0225843153299808	0.105269040050489	0.0225843153299808	0.0775379919035264	NA	prevalence	120	11	0.0508147094924568
s__Alphapapillomavirus 1	Year_cat	2024-2025	Year_cat2024-2025	-0.992259404512901	0	0.436540479703057	0.0230257804224404	0.106447050477511	0.0455213742808184	0.125491356125499	NA	prevalence	120	34	0.0510571652845418
s__Anellovirus D_HF7_66	Year_cat	2024-2025	Year_cat2024-2025	-1.09886961896456	0	0.488265567578182	0.0244135928672774	0.111945255098736	0.0482311622178657	0.12723047964368	NA	prevalence	120	26	0.0533611386956206
s__Alphainfluenzavirus influenzae	Year_cat	2024-2025	Year_cat2024-2025	3.2909394860407	0	1.47435289243377	0.0256067233441618	0.11472640792213	0.0256067233441618	0.0861061246517967	NA	prevalence	120	17	0.0551806855162923
s__Mupapillomavirus 3	Year_cat	2024-2025	Year_cat2024-2025	-2.10584030170351	0	0.955200412888708	0.027481773469002	0.120152870050521	0.0542082990650026	0.138231162615756	NA	prevalence	120	8	0.0583987686216293
s__Alphapapillomavirus 11	Year_cat	2024-2025	Year_cat2024-2025	-0.987482354320265	0	0.451911610231966	0.0288798453649905	0.123486734553923	0.0569256452616752	0.139455276642413	NA	prevalence	120	30	0.0605289909704595
s__Gemykibivirus humas1	Year_cat	2024-2025	Year_cat2024-2025	-1.9955389071067	0	0.927810353877304	0.0314916148098602	0.132421970192962	0.0619915078163879	0.14685366640147	NA	prevalence	120	9	0.0651110414311974
s__Gammapapillomavirus 23	Year_cat	2024-2025	Year_cat2024-2025	-3.16759238648734	0	1.49817210749184	0.0344892478850956	0.137956991540382	0.0344892478850956	0.107690916865707	NA	prevalence	120	7	0.070358065685595
s__Alphapapillomavirus 9	Year_cat	2024-2025	Year_cat2024-2025	-0.807746831700873	0	0.386777078373545	0.0367613990233607	0.144989014329898	0.0721713975885667	0.163588501200751	NA	prevalence	120	51	0.0740065006654498
s__Alphapolyomavirus quintihominis	Year_cat	2024-2025	Year_cat2024-2025	-3.08885934404341	0	1.51440715426149	0.0413852777555243	0.158784330980379	4.07705283064186e-06	5.19824235906837e-05	NA	prevalence	120	114	0.0822330843713665
s__Alphapolyomavirus quardecihominis	Year_cat	2024-2025	Year_cat2024-2025	-1.4004113628771	0	0.689748465376529	0.042323837185296	0.159506514902882	0.0828563671765046	0.181511046083091	NA	prevalence	120	12	0.0830198344788498
s__Enterovirus B	Year_cat	2024-2025	Year_cat2024-2025	0.843657841679356	0	0.418760471032965	0.0439408191130034	0.163043565656144	0.0859508426416852	0.185218013016589	NA	prevalence	120	40	0.0851005737251838
s__Gammapapillomavirus 22	Year_cat	2024-2025	Year_cat2024-2025	-2.95363769850483	0	1.48864338224338	0.0472431684951265	0.169714312300964	0.0472431684951265	0.126810610171129	NA	prevalence	120	7	0.0892370960463501
s__Human papillomavirus KC5	Year_cat	2024-2025	Year_cat2024-2025	-2.93086342830004	0	1.47581137232803	0.0470406945090621	0.169714312300964	0.0470406945090621	0.126810610171129	NA	prevalence	120	8	0.0892370960463501
s__Anellovirus D_HF6_322	Year_cat	2024-2025	Year_cat2024-2025	-1.5332498135546	0	0.79608772256203	0.0541067485703623	0.184946704204148	0.105285956899868	0.216224851082951	NA	prevalence	120	9	0.10095527477153
s__Gammapapillomavirus 17	Year_cat	2024-2025	Year_cat2024-2025	-2.85722743969714	0	1.50002196944606	0.0568073229311164	0.190710298411605	0.0568073229311164	0.139455276642413	NA	prevalence	120	6	0.10471711335495
s__Gammapapillomavirus 14	Year_cat	2024-2025	Year_cat2024-2025	-2.8452242324164	0	1.52115437606723	0.0614230845332855	0.201410579516122	0.0614230845332855	0.146839561462386	NA	prevalence	120	5	0.111877761114199
s__Hepatitis E virus	Year_cat	2024-2025	Year_cat2024-2025	-0.824762707521387	0	0.445946879340771	0.0643908387728292	0.208715132573998	0.12463549742779	0.244477321877588	NA	prevalence	120	31	0.115903509791093
s__Parechovirus A	Year_cat	2024-2025	Year_cat2024-2025	-0.732296124056919	0	0.401683338680895	0.0682930611208912	0.216831383311894	0.131922180044521	0.252798416752393	NA	prevalence	120	79	0.121498120366237
s__Rhinovirus B	Year_cat	2024-2025	Year_cat2024-2025	-0.691844821787966	0	0.386883108483619	0.0737352229499113	0.226598097209236	0.142033562796349	0.262130671347678	NA	prevalence	120	54	0.129672288636051
s__Alphapapillomavirus 13	Year_cat	2024-2025	Year_cat2024-2025	-1.32179880240126	0	0.759489014551296	0.0817924741307912	0.24295227595104	0.156894939437146	0.277686232910244	NA	prevalence	120	10	0.14032001269467
s__Alphatorquevirus homin13	Year_cat	2024-2025	Year_cat2024-2025	-1.0485861504551	0	0.602609301207623	0.0818456248771233	0.24295227595104	0.15699254344272	0.277686232910244	NA	prevalence	120	15	0.14032001269467
s__Betapolyomavirus tertihominis	Year_cat	2024-2025	Year_cat2024-2025	-1.81575705282584	0	1.04586581821844	0.0825411839380414	0.24373417665474	0.158269320830189	0.278335702149643	NA	prevalence	120	5	0.14032001269467
s__Human mastadenovirus A	Year_cat	2024-2025	Year_cat2024-2025	1.02189896429815	0	0.594268649947699	0.0855068309578869	0.249874884249991	0.00637981816800124	0.0278889194201197	NA	prevalence	120	104	0.143764232269854
s__Human circovirus VS6600022	Year_cat	2024-2025	Year_cat2024-2025	-2.82486226336495	0	1.64913790523987	0.0867249194875375	0.252128116448305	0.0397886771336517	0.115955573360928	NA	prevalence	120	117	0.144227311756448
s__Bocaparvovirus primate2	Year_cat	2024-2025	Year_cat2024-2025	0.947262514502017	0	0.561850136909308	0.0918015643657955	0.26416368521586	0.017564645824993	0.0647564050897333	NA	prevalence	120	103	0.151028380085664
s__Gammapapillomavirus 16	Year_cat	2024-2025	Year_cat2024-2025	-2.49989826153707	0	1.5310968281355	0.102521598462776	0.283442066338262	0.102521598462776	0.21197033195682	NA	prevalence	120	4	0.16687026132771
s__Papillomavirus homo8923	Year_cat	2024-2025	Year_cat2024-2025	-2.44771575180109	0	1.52810165024438	0.109199477062714	0.293419717350975	0.109199477062714	0.221291655504574	NA	prevalence	120	4	0.1740366665687
s__Human polyomavirus 16	Year_cat	2024-2025	Year_cat2024-2025	-2.41955821176328	0	1.52654231646094	0.112968025031602	0.300026029286958	0.112968025031602	0.226615405099724	NA	prevalence	120	4	0.176898760103356
s__Papillomavirus homo7424	Year_cat	2024-2025	Year_cat2024-2025	-2.41706266447589	0	1.526405878914	0.113307702549862	0.300026029286958	0.113307702549862	0.226615405099724	NA	prevalence	120	4	0.176898760103356
s__Gammainfluenzavirus influenzae	Year_cat	2024-2025	Year_cat2024-2025	1.54869946921426	0	1.00485225137591	0.123262989431179	0.314571611037035	0.231332214298847	0.37653009348642	NA	prevalence	120	5	0.190497347302731
s__Gammapapillomavirus 26	Year_cat	2024-2025	Year_cat2024-2025	-2.32596930748287	0	1.52160497048981	0.126356471408561	0.315792937513958	0.126356471408561	0.246274396503309	NA	prevalence	120	4	0.193325401255098
s__Human mastadenovirus C	Year_cat	2024-2025	Year_cat2024-2025	0.691752624182718	0	0.454732023373923	0.128201782916969	0.317130726163029	0.220514765860365	0.366725643224302	NA	prevalence	120	27	0.194206661250458
s__Alphatorquevirus homin10	Year_cat	2024-2025	Year_cat2024-2025	-1.14901513326171	0	0.769512336202484	0.135391877256815	0.329142322296739	0.252452794086505	0.39817090845073	NA	prevalence	120	9	0.203087815885223
s__Human coronavirus HKU1	Year_cat	2024-2025	Year_cat2024-2025	2.22608041251937	0	1.52003086073319	0.143058242206086	0.341884951712849	0.143058242206086	0.262130671347678	NA	prevalence	120	4	0.212503990849817
s__Orthorubulavirus hominis	Year_cat	2024-2025	Year_cat2024-2025	2.13750417929057	0	1.52365855016156	0.160653786073101	0.359558473592178	0.160653786073101	0.280914620219251	NA	prevalence	120	4	0.23634643528062
s__Dependoparvovirus mammalian1	Year_cat	2024-2025	Year_cat2024-2025	-1.05913825134044	0	0.787876366875009	0.178853015584419	0.387973464575433	0.325717629985198	0.470139597997503	NA	prevalence	120	8	0.255743097050618
s__Cardiovirus D	Year_cat	2024-2025	Year_cat2024-2025	1.90897537797964	0	1.54110567695316	0.21545474943206	0.438020524405364	0.21545474943206	0.360268597410986	NA	prevalence	120	4	0.296978168136083
s__Roseolovirus humanbeta7	Year_cat	2024-2025	Year_cat2024-2025	-0.477050425253397	0	0.388157307790012	0.219066885647856	0.438020524405364	0.0630168984709398	0.147199778107691	NA	prevalence	120	68	0.29926101342966
s__Alphatorquevirus homin20	Year_cat	2024-2025	Year_cat2024-2025	1.15218962784117	0	0.982529394687225	0.240925356166566	0.470179587812952	0.423805685089145	0.583770990170205	NA	prevalence	120	5	0.326208668083935
s__Human mastadenovirus D	Year_cat	2024-2025	Year_cat2024-2025	-0.4646273344352	0	0.403298148009882	0.249292679480641	0.478234936146535	0.436438518918644	0.58618148020271	NA	prevalence	120	80	0.334577017197702
s__Hetorquevirus hominid2	Year_cat	2024-2025	Year_cat2024-2025	0.837679209492241	0	0.793345467179019	0.291022122434611	0.531186009880649	0.497350369122876	0.639450474586555	NA	prevalence	120	9	0.387185954195613
s__Salivirus A	Year_cat	2024-2025	Year_cat2024-2025	-0.410700304938131	0	0.393404425642056	0.296501755119263	0.537707362981557	0.505090219449722	0.646025434341726	NA	prevalence	120	68	0.391075590803856
s__Torque teno virus 16	Year_cat	2024-2025	Year_cat2024-2025	0.563199382824182	0	0.550849604824195	0.306582390573474	0.548928470741077	0.142386243385749	0.262130671347678	NA	prevalence	120	16	0.400915433826851
s__SEN virus	Year_cat	2024-2025	Year_cat2024-2025	-0.710808644894074	0	0.709907716456095	0.316696738006888	0.565243545050269	0.533096652149573	0.668555637531841	NA	prevalence	120	9	0.410632211144524
s__Human cosavirus	Year_cat	2024-2025	Year_cat2024-2025	-0.784009467874137	0	0.806284710208424	0.33086502811584	0.57773336178741	0.552258389401584	0.680967281409074	NA	prevalence	120	7	0.425397893291794
s__Kobuvirus aichi	Year_cat	2024-2025	Year_cat2024-2025	1.38820930957167	0	1.57516901687381	0.378151050116964	0.625446311630404	0.613303883529366	0.716301482290023	NA	prevalence	120	118	0.482142588899129
s__Mamastrovirus 1	Year_cat	2024-2025	Year_cat2024-2025	1.50608904104368	0	1.72339253515014	0.382167562093205	0.629389271082883	0.000151989143892238	0.00119253020592371	NA	prevalence	120	119	0.483236669423639
s__Astrovirus VA3	Year_cat	2024-2025	Year_cat2024-2025	0.35268799828425	0	0.414229353763867	0.394529594871615	0.644970120311858	0.63340558851367	0.730476051454677	NA	prevalence	120	34	0.492384582658997
s__Hepatovirus A	Year_cat	2024-2025	Year_cat2024-2025	0.852406433434082	0	1.00392153268881	0.395838586059194	0.645239776119611	0.634988985905046	0.730476051454677	NA	prevalence	120	5	0.492384582658997
s__Alphatorquevirus homin5	Year_cat	2024-2025	Year_cat2024-2025	-0.766306545732707	0	0.910805281110134	0.4001515662118	0.646663276055745	0.640181856481843	0.73095391075912	NA	prevalence	120	5	0.493735400245205
s__Alphapapillomavirus 8	Year_cat	2024-2025	Year_cat2024-2025	-0.452722544746469	0	0.548580359270908	0.409222839698908	0.657554648405083	0.205647046427205	0.34766848732997	NA	prevalence	120	16	0.500888755791463
s__Gyrovirus homsa2	Year_cat	2024-2025	Year_cat2024-2025	-0.614176973516748	0	0.785803925235595	0.434455203889051	0.675447828830174	0.347818116635672	0.493084347885825	NA	prevalence	120	7	0.523398788937203
s__Erythroparvovirus primate1	Year_cat	2024-2025	Year_cat2024-2025	0.475178374319047	0	0.646506783920285	0.46234336757344	0.697223687998449	0.710925345607731	0.785354352909623	NA	prevalence	120	11	0.552644806552627
s__Betapolyomavirus quartihominis	Year_cat	2024-2025	Year_cat2024-2025	0.425275188093448	0	0.598282406747074	0.477191550905377	0.706353203420385	0.492289547983774	0.635614353092974	NA	prevalence	120	13	0.565971374329633
s__Rhinovirus C	Year_cat	2024-2025	Year_cat2024-2025	-0.274281055724908	0	0.394275493552484	0.486642788728777	0.71105319389386	0.0435787986962976	0.122340480743735	NA	prevalence	120	78	0.572741128273099
s__Varicellovirus humanalpha3	Year_cat	2024-2025	Year_cat2024-2025	-0.428438976789658	0	0.643354397709117	0.505445925676755	0.719877530509318	0.658914513573887	0.746769782050405	NA	prevalence	120	11	0.590329974263691
s__Simplexvirus humanalpha2	Year_cat	2024-2025	Year_cat2024-2025	-0.236304066436978	0	0.385877338035184	0.540285510246869	0.740694683938084	0.788662587911018	0.840873700002688	NA	prevalence	120	56	0.626240023240689
s__Cytomegalovirus humanbeta5	Year_cat	2024-2025	Year_cat2024-2025	-0.234769257400758	0	0.389560531284964	0.546740520136045	0.743040128570432	0.47341198577608	0.625174137778141	NA	prevalence	120	44	0.628957139705375
s__Adeno-associated virus	Year_cat	2024-2025	Year_cat2024-2025	-0.249785256023787	0	0.424856519226726	0.556580285886046	0.749513354914849	0.0300142200037726	0.0977058651186639	NA	prevalence	120	31	0.63549838612362
s__Protoparvovirus primate1	Year_cat	2024-2025	Year_cat2024-2025	-0.370677396645502	0	0.658730540001277	0.573629132988366	0.758943409979109	0.665228718227506	0.750087270455515	NA	prevalence	120	10	0.650113017386815
s__Rotavirus A	Year_cat	2024-2025	Year_cat2024-2025	0.882558159440918	0	1.66396668090934	0.595838695299784	0.774315723845802	0.000498897004930374	0.00331874964149336	NA	prevalence	120	119	0.670318532212257
s__Dependoparvovirus primate1	Year_cat	2024-2025	Year_cat2024-2025	0.226858116429313	0	0.473048260242766	0.63153564483462	0.802220954249382	0.797688984732801	0.847544546278601	NA	prevalence	120	24	0.705291632552532
s__Gammapapillomavirus 6	Year_cat	2024-2025	Year_cat2024-2025	-0.354895484609192	0	0.762982816734813	0.641829647340697	0.808017681027127	0.0610813609888	0.146839561462386	NA	prevalence	120	7	0.711593739442947
s__Roseolovirus humanbeta6b	Year_cat	2024-2025	Year_cat2024-2025	-0.286367053560979	0	0.632728930094971	0.650843696858922	0.813343074104741	0.878089875976856	0.923352240717931	NA	prevalence	120	11	0.716396299420252
s__Cosavirus D	Year_cat	2024-2025	Year_cat2024-2025	0.358936615690344	0	0.851048022496921	0.673201404209019	0.823612997774158	0.893202677789043	0.926508540350669	NA	prevalence	120	6	0.735712963171285
s__Simplexvirus humanalpha1	Year_cat	2024-2025	Year_cat2024-2025	-0.154147587059008	0	0.375192070344128	0.681182674099109	0.831573654095016	0.898355512705405	0.928705361107614	NA	prevalence	120	63	0.739155667639459
s__Mamastrovirus 6	Year_cat	2024-2025	Year_cat2024-2025	0.172224843802312	0	0.470438916672051	0.714294967762316	0.855334101524302	0.348059539684112	0.493084347885825	NA	prevalence	120	95	0.769627676532636
s__Alphatorquevirus homin7	Year_cat	2024-2025	Year_cat2024-2025	-0.233801125891636	0	0.728639541652819	0.748306250683561	0.881095460095049	0.891790689450443	0.926508540350669	NA	prevalence	120	8	0.800635359122971
s__Rotavirus C	Year_cat	2024-2025	Year_cat2024-2025	0.218532030328356	0	0.714022701551745	0.759560837066219	0.892483983552808	0.233492562757918	0.378035577798533	NA	prevalence	120	8	0.807033389382858
s__Human mastadenovirus F	Year_cat	2024-2025	Year_cat2024-2025	-0.268643828796933	0	1.19537577576993	0.822184749058912	0.920767515805542	1.39215349439046e-05	0.000146896196304648	NA	prevalence	120	118	0.85574331024499
s__Cosavirus A	Year_cat	2024-2025	Year_cat2024-2025	-0.0788274654946098	0	0.415662111743842	0.849588784580737	0.927864085092264	0.114424041130295	0.227362055752403	NA	prevalence	120	33	0.868177844841973
s__Lymphocryptovirus humangamma4	Year_cat	2024-2025	Year_cat2024-2025	0.135679310152534	0	0.666430305105748	0.838673011992598	0.927864085092264	0.00263762288028427	0.0139157345063274	NA	prevalence	120	110	0.867006559695051
s__Torque teno midi virus	Year_cat	2024-2025	Year_cat2024-2025	0.106322905427707	0	0.566616548804541	0.851154749845072	0.927864085092264	0.977845091506317	0.987526726075686	NA	prevalence	120	14	0.868177844841973
s__Burkina Faso astrovirus	Year_cat	2024-2025	Year_cat2024-2025	-0.0996911093072461	0	0.917554969944203	0.913481171551878	0.950559743090884	0.75035544438766	0.815711023316888	NA	prevalence	120	5	0.925580259916804
s__Cardiovirus B	Year_cat	2024-2025	Year_cat2024-2025	-0.0646418187201471	0	0.653467399624989	0.921200788437099	0.95506846448258	0.786660921996899	0.840873700002688	NA	prevalence	120	10	0.927261319939975
s__Alphatorquevirus homin15	Year_cat	2024-2025	Year_cat2024-2025	0.0240971779226949	0	0.711897410955251	0.972997379984216	0.990016741407873	0.692242797378423	0.76967363019551	NA	prevalence	120	8	0.972997379984216
s__Gammapapillomavirus 8	Year_cat	2024-2025	Year_cat2024-2025	-2.67233765636174	0	0.547520687101871	1.056576375227e-06	2.59090902446969e-05	0.0549587850027968	0.138986679428561	Prevalence association possibly induced by stronger abundance association	prevalence	120	37	1.21957857266687e-05
s__Deltapolyomavirus decihominis	Year_cat	2024-2025	Year_cat2024-2025	-2.17562029721726	0	0.479763767727	5.7665176594857e-06	0.000104913418062901	0.144698950655972	0.263558802980521	Prevalence association possibly induced by stronger abundance association	prevalence	120	40	4.64356422053322e-05
s__Torque teno virus	Year_cat	2024-2025	Year_cat2024-2025	-1.99422962880944	0	0.635721203144925	0.00170711573513676	0.0133724065919046	0.000534975525208536	0.00348303214284707	Prevalence association possibly induced by stronger abundance association	prevalence	120	98	0.00593610698808919
s__Sapporo virus	Year_cat	2024-2025	Year_cat2024-2025	1.78896240187341	0	0.723555973209728	0.01341871442055	0.074932227061289	5.55860690809595e-10	1.54630337625215e-08	Prevalence association possibly induced by stronger abundance association	prevalence	120	105	0.0347976831583754
s__Enterovirus C	Year_cat	2024-2025	Year_cat2024-2025	-0.887471902654483	0	0.553269759437852	0.108703213059225	0.293419717350975	0.0373627910823351	0.112088373247005	Prevalence association possibly induced by stronger abundance association	prevalence	120	103	0.1740366665687
s__Human fecal virus Jorvi2	Year_cat	2024-2025	Year_cat2024-2025	-2.23273558847501	0	1.63370126624202	0.171727790340782	0.379821465694905	1.02660102641039e-11	6.46045734545278e-10	Prevalence association possibly induced by stronger abundance association	prevalence	120	118	0.250231923067997
s__Human mastadenovirus B	Year_cat	2024-2025	Year_cat2024-2025	0.514351210535644	0	0.379596699941334	0.175419502494439	0.384967312867174	2.60474981106373e-05	0.000265684480728501	Prevalence association possibly induced by stronger abundance association	prevalence	120	60	0.253199847940086
s__Betapolyomavirus secuhominis	Year_cat	2024-2025	Year_cat2024-2025	-2.08354124846984	0	1.60319647080214	0.193732299994357	0.410770741341418	0	0	Prevalence association possibly induced by stronger abundance association	prevalence	120	118	0.274454091658672
s__Norwalk virus	Year_cat	2024-2025	Year_cat2024-2025	1.99283209409131	0	1.54278426635542	0.196457092445033	0.413439552757458	5.55111512312578e-16	8.49320613838245e-14	Prevalence association possibly induced by stronger abundance association	prevalence	120	117	0.27576087288156
s__Molluscum contagiosum virus	Year_cat	2024-2025	Year_cat2024-2025	-2.01978479553657	0	1.59424952157227	0.205184302228762	0.425455685503757	3.02065483737124e-10	9.24320380235599e-09	Prevalence association possibly induced by stronger abundance association	prevalence	120	118	0.285392711281823
s__Human respiratory circovirus-like 1	Year_cat	2024-2025	Year_cat2024-2025	-0.569502832507038	0	0.704212978031229	0.418682991900672	0.665651932661476	0.0261177490769136	0.0868699045384299	Prevalence association possibly induced by stronger abundance association	prevalence	120	9	0.508400775879387
s__Bocaparvovirus primate1	Year_cat	2024-2025	Year_cat2024-2025	-0.113607431799911	0	0.429872007085345	0.791562632812427	0.916290018188894	9.03183794228601e-05	0.000812865414805741	Prevalence association possibly induced by stronger abundance association	prevalence	120	90	0.833857404029859
s__TTV-like mini virus	Year_cat	2024-2025	Year_cat2024-2025	-0.106278033621755	0	0.410487433346556	0.795707065283395	0.917668728778474	0.454361881935681	0.607138584595277	Prevalence association possibly induced by stronger abundance association	prevalence	120	46	0.833857404029859

## Sheet: TableS7_MaAsLin_abundance
feature	metadata	value	name	coef	null_hypothesis	stderr	pval_individual	qval_individual	pval_joint	qval_joint	error	model	N	N_not_zero	qval_individual_readj
s__Betapolyomavirus secuhominis	Year_cat	2024-2025	Year_cat2024-2025	-5.05065498040996	-1.12075760786928	0.319881280485607	0	0	0	0	NA	abundance	120	118	0
s__Norwalk virus	Year_cat	2024-2025	Year_cat2024-2025	2.45558135198108	-1.12075760786928	0.29751390407597	5.55111512312578e-16	1.56541446472147e-13	5.55111512312578e-16	8.49320613838245e-14	NA	abundance	120	117	3.58046925441613e-14
s__Betapapillomavirus 2	Year_cat	2024-2025	Year_cat2024-2025	-5.0980265736377	-1.12075760786928	0.392522659195196	1.12576614696991e-13	2.11644035630343e-11	2.25153229393969e-13	2.29656293981848e-11	NA	abundance	120	98	4.84079443197061e-12
s__Human fecal virus Jorvi2	Year_cat	2024-2025	Year_cat2024-2025	-3.44295256518876	-1.12075760786928	0.197599121341017	1.02660102641039e-11	9.65004964825766e-10	1.02660102641039e-11	6.46045734545278e-10	NA	abundance	120	118	3.31078831017351e-10
s__Betapapillomavirus 1	Year_cat	2024-2025	Year_cat2024-2025	-4.53051373135494	-1.12075760786928	0.395865493907723	3.23741033980696e-11	2.6084277595016e-09	6.47482067950909e-11	2.83042161132826e-09	NA	abundance	120	107	8.35251867670196e-10
s__Betapolyomavirus hominis	Year_cat	2024-2025	Year_cat2024-2025	-4.10025712970338	-1.12075760786928	0.33307930566457	4.21100931902174e-11	2.96876156991033e-09	8.42201863786614e-11	3.2214221289838e-09	NA	abundance	120	114	9.05367003589674e-10
s__Molluscum contagiosum virus	Year_cat	2024-2025	Year_cat2024-2025	-3.57378804912575	-1.12075760786928	0.266226763276624	3.02065483737124e-10	1.70364932827738e-08	3.02065483737124e-10	9.24320380235599e-09	NA	abundance	120	118	5.56663534315557e-09
s__Sapporo virus	Year_cat	2024-2025	Year_cat2024-2025	1.8979270797561	-1.12075760786928	0.370942618683219	5.55860690809595e-10	2.6125452468051e-08	5.55860690809595e-10	1.54630337625215e-08	NA	abundance	120	105	8.96325363930472e-09
s__Human papillomavirus	Year_cat	2024-2025	Year_cat2024-2025	-3.9633884269524	-1.12075760786928	0.378581305001769	1.29249060343284e-08	5.20689071668658e-07	2.58498119016036e-08	5.65003031563621e-07	NA	abundance	120	84	1.8525698649204e-07
s__Gammapapillomavirus 1	Year_cat	2024-2025	Year_cat2024-2025	-3.75851118640073	-1.12075760786928	0.391125506516664	1.12430779131145e-07	3.73005643705682e-06	2.2486154562161e-07	4.04750782118898e-06	NA	abundance	120	95	1.45035705079177e-06
s__Alphapolyomavirus quintihominis	Year_cat	2024-2025	Year_cat2024-2025	-3.04417588166158	-1.12075760786928	0.306841650131127	2.03852849312014e-06	4.59892028047904e-05	4.07705283064186e-06	5.19824235906837e-05	NA	abundance	120	114	2.39063796011362e-05
s__Mupapillomavirus 1	Year_cat	2024-2025	Year_cat2024-2025	-3.50400994545779	-1.12075760786928	0.402624407614328	2.55314823083275e-06	5.5383677007295e-05	3.85557889304576e-07	6.20951126985265e-06	NA	abundance	120	76	2.74463434814521e-05
s__Human mastadenovirus F	Year_cat	2024-2025	Year_cat2024-2025	1.00471166375783	-1.12075760786928	0.38629081686625	6.9607916982628e-06	0.000122683953681882	1.39215349439046e-05	0.000146896196304648	NA	abundance	120	118	6.9072471467377e-05
s__Human mastadenovirus B	Year_cat	2024-2025	Year_cat2024-2025	1.84894391252111	-1.12075760786928	0.602115316038883	2.60474981106373e-05	0.000432082027482337	2.60474981106373e-05	0.000265684480728501	NA	abundance	120	60	0.000240009089733729
s__Mamastrovirus 1	Year_cat	2024-2025	Year_cat2024-2025	1.21452343235193	-1.12075760786928	0.519832229551362	7.59974597530633e-05	0.00104542847074946	0.000151989143892238	0.00119253020592371	NA	abundance	120	119	0.000653578153876344
s__Bocaparvovirus primate1	Year_cat	2024-2025	Year_cat2024-2025	-2.86084655248309	-1.12075760786928	0.352230791171046	9.03183794228601e-05	0.00120781145784921	9.03183794228601e-05	0.000812865414805741	NA	abundance	120	90	0.00072819193409681
s__Rotavirus A	Year_cat	2024-2025	Year_cat2024-2025	0.649702864094683	-1.12075760786928	0.402231467348607	0.00024947962250621	0.00281413014187005	0.000498897004930374	0.00331874964149336	NA	abundance	120	119	0.00189311007666477
s__Torque teno virus	Year_cat	2024-2025	Year_cat2024-2025	-2.7646610165666	-1.12075760786928	0.393810764563195	0.000534975525208536	0.00546925238713097	0.000534975525208536	0.00348303214284707	NA	abundance	120	98	0.00383399126399451
s__HMO Astrovirus A	Year_cat	2024-2025	Year_cat2024-2025	1.01439574656441	-1.12075760786928	0.569570537838731	0.000836239807959771	0.00799388562185273	1.75772251604855e-06	2.44483222686753e-05	NA	abundance	120	80	0.00567762816983213
s__Sapovirus Sapozj-9	Year_cat	2024-2025	Year_cat2024-2025	2.9856594982262	-1.12075760786928	1.1168266910464	0.000921679530243136	0.00866378758428548	2.17668603273293e-07	4.04750782118898e-06	NA	abundance	120	40	0.00594483297006823
s__Lymphocryptovirus humangamma4	Year_cat	2024-2025	Year_cat2024-2025	0.557098731218212	-1.12075760786928	0.452625651930368	0.00131968222072398	0.0116041546141633	0.00263762288028427	0.0139157345063274	NA	abundance	120	110	0.00810661935587588
s__Mupapillomavirus 2	Year_cat	2024-2025	Year_cat2024-2025	-3.44858552039964	-1.12075760786928	0.673375698274874	0.00183584402494352	0.0141837812338102	1.26675634224564e-11	6.46045734545278e-10	NA	abundance	120	61	0.0107647217826234
s__Human mastadenovirus A	Year_cat	2024-2025	Year_cat2024-2025	0.536601457623787	-1.12075760786928	0.4962173109529	0.00319501313847814	0.0234024338974243	0.00637981816800124	0.0278889194201197	NA	abundance	120	104	0.0179198562984209
s__Gammapapillomavirus 21	Year_cat	2024-2025	Year_cat2024-2025	4.16516322586144	-1.12075760786928	1.51009002013423	0.00354790157308171	0.024703907249606	0.00275718079898424	0.0140616220748196	NA	abundance	120	18	0.0190699709553142
s__Severe acute respiratory syndrome-related coronavirus	Year_cat	2024-2025	Year_cat2024-2025	0.795784643273159	-1.12075760786928	0.627360913960985	0.00553235640670857	0.0367088119221604	0.0006780451019043	0.00414963602365432	NA	abundance	120	74	0.0285469590586162
s__Rhinovirus A	Year_cat	2024-2025	Year_cat2024-2025	-2.90085790883108	-1.12075760786928	0.608911468350588	0.00811482998588975	0.0497474360004545	0.0161638095060796	0.0603186062056141	NA	abundance	120	76	0.0402620410838376
s__Bocaparvovirus primate2	Year_cat	2024-2025	Year_cat2024-2025	-2.22271863713782	-1.12075760786928	0.339840695367906	0.00882122996151347	0.053496491379501	0.017564645824993	0.0647564050897333	NA	abundance	120	103	0.0421458764827866
s__Adeno-associated virus	Year_cat	2024-2025	Year_cat2024-2025	1.97241020221488	-1.12075760786928	1.17190130898748	0.0151214389599967	0.0828008890625064	0.0300142200037726	0.0977058651186639	NA	abundance	120	31	0.0696666294942705
s__Salivirus FHB	Year_cat	2024-2025	Year_cat2024-2025	0.226246279843762	-1.12075760786928	0.498112203705774	0.0167819347011937	0.0884580483315257	0.000199333182983974	0.00148770619495357	NA	abundance	120	72	0.0746506750501375
s__Human circovirus VS6600022	Year_cat	2024-2025	Year_cat2024-2025	-1.96744771764856	-1.12075760786928	0.272582027713072	0.0200962685720866	0.0985590910839724	0.0397886771336517	0.115955573360928	NA	abundance	120	117	0.0864139548599724
s__Rhinovirus C	Year_cat	2024-2025	Year_cat2024-2025	0.163895465112611	-1.12075760786928	0.49686109933308	0.0220321061999518	0.104421074762797	0.0435787986962976	0.122340480743735	NA	abundance	120	78	0.0916819903159285
s__Human respiratory circovirus-like 1	Year_cat	2024-2025	Year_cat2024-2025	-3.10457153668982	-1.12075760786928	0.635646113849541	0.0261177490769136	0.1159874840896	0.0261177490769136	0.0868699045384299	NA	abundance	120	9	0.105287175966308
s__Alphapapillomavirus 1	Year_cat	2024-2025	Year_cat2024-2025	0.819030203557644	-1.12075760786928	0.807567163352826	0.027442735524434	0.120152870050521	0.0455213742808184	0.125491356125499	NA	abundance	120	34	0.107276147959151
s__Gammapapillomavirus 6	Year_cat	2024-2025	Year_cat2024-2025	1.41720119270177	-1.12075760786928	0.743422716153523	0.0310218583418922	0.131551339134039	0.0610813609888	0.146839561462386	NA	abundance	120	7	0.117700580179532
s__Roseolovirus humanbeta7	Year_cat	2024-2025	Year_cat2024-2025	0.176938297351167	-1.12075760786928	0.543550113075523	0.0320211254737734	0.132793490935355	0.0630168984709398	0.147199778107691	NA	abundance	120	68	0.118020719603336
s__Enterovirus C	Year_cat	2024-2025	Year_cat2024-2025	-2.26799113604717	-1.12075760786928	0.493683334178273	0.0373627910823351	0.146309772340776	0.0373627910823351	0.112088373247005	NA	abundance	120	103	0.133883334711701
s__Gemykibivirus humas1	Year_cat	2024-2025	Year_cat2024-2025	3.02255468649424	-1.12075760786928	1.69700074662313	0.0520330834066608	0.181152216304671	0.0619915078163879	0.14685366640147	NA	abundance	120	9	0.181412642147547
s__Gammapapillomavirus 8	Year_cat	2024-2025	Year_cat2024-2025	-3.05191764379742	-1.12075760786928	0.945034292171148	0.0549587850027968	0.186727438202274	0.0549587850027968	0.138986679428561	NA	abundance	120	37	0.186570612246337
s__Cosavirus A	Year_cat	2024-2025	Year_cat2024-2025	0.141810073418039	-1.12075760786928	0.598917654513283	0.0589495449925623	0.19557378456356	0.114424041130295	0.227362055752403	NA	abundance	120	33	0.19498695651386
s__Torque teno virus 16	Year_cat	2024-2025	Year_cat2024-2025	0.82974622065756	-1.12075760786928	0.979418988892818	0.0739256203661336	0.226598097209236	0.142386243385749	0.262130671347678	NA	abundance	120	16	0.238410125680781
s__Gammapapillomavirus 4	Year_cat	2024-2025	Year_cat2024-2025	-2.73313028820982	-1.12075760786928	0.878475000939639	0.0805049302456717	0.241514790737015	1.06360190642439e-11	6.46045734545278e-10	NA	abundance	120	58	0.25329600004126
s__Deltapolyomavirus sextihominis	Year_cat	2024-2025	Year_cat2024-2025	-2.19298157014211	-1.12075760786928	0.589753806240571	0.0940216562902354	0.269010725784778	4.9895104046803e-08	1.01786012255478e-06	NA	abundance	120	74	0.283864149010864
s__Gammapapillomavirus 3	Year_cat	2024-2025	Year_cat2024-2025	1.4365780530476	-1.12075760786928	1.42543590456982	0.0946213830036213	0.269010725784778	0.00323474325586148	0.0154545936128114	NA	abundance	120	19	0.283864149010864
s__Deltapolyomavirus septihominis	Year_cat	2024-2025	Year_cat2024-2025	0.487609920639452	-1.12075760786928	0.914778991124932	0.0982608524519949	0.275717018820523	0.000120782504702325	0.00100620156235813	NA	abundance	120	31	0.287319113374096
s__Betacoronavirus 1	Year_cat	2024-2025	Year_cat2024-2025	0.354594156006465	-1.12075760786928	0.835937549451005	0.100227597688638	0.278464852691585	0.000649090946280354	0.00405350672575078	NA	abundance	120	26	0.287319113374096
s__Alphapapillomavirus 8	Year_cat	2024-2025	Year_cat2024-2025	1.09996465043118	-1.12075760786928	1.271909091028	0.108735194472038	0.293419717350975	0.205647046427205	0.34766848732997	NA	abundance	120	16	0.304931306236802
s__Gammapapillomavirus sp.	Year_cat	2024-2025	Year_cat2024-2025	-3.35851583723457	-1.12075760786928	1.34561541604306	0.112546059503123	0.300026029286958	7.10077114093467e-06	8.35706141971542e-05	NA	abundance	120	29	0.308903014380912
s__Human mastadenovirus C	Year_cat	2024-2025	Year_cat2024-2025	0.139589675354489	-1.12075760786928	0.741186556099822	0.117115390246474	0.307223628367495	0.220514765860365	0.366725643224302	NA	abundance	120	27	0.314747611287399
s__Enterovirus B	Year_cat	2024-2025	Year_cat2024-2025	0.34001447402227	-1.12075760786928	0.890668619181025	0.119815963239075	0.310054050771868	0.0859508426416852	0.185218013016589	NA	abundance	120	40	0.315433862404912
s__Rotavirus C	Year_cat	2024-2025	Year_cat2024-2025	1.85072776782712	-1.12075760786928	1.59886239839583	0.124495895359661	0.314928719727043	0.233492562757918	0.378035577798533	NA	abundance	120	8	0.321199410027925
s__Deltapolyomavirus decihominis	Year_cat	2024-2025	Year_cat2024-2025	-2.44444306730225	-1.12075760786928	0.861381160058856	0.144698950655972	0.342900034327598	0.144698950655972	0.263558802980521	NA	abundance	120	40	0.366003228129812
s__Enterovirus A	Year_cat	2024-2025	Year_cat2024-2025	0.0297539778602215	-1.12075760786928	0.757874694677006	0.152678334813376	0.352132199507071	0.000293902626518886	0.00209149310964602	NA	abundance	120	55	0.378759715210106
s__Gammapapillomavirus 15	Year_cat	2024-2025	Year_cat2024-2025	0.528906914089346	-1.12075760786928	1.12215674125031	0.158652971211804	0.358333185412139	2.23190725364431e-06	2.96940704180503e-05	NA	abundance	120	36	0.386155345024957
s__Gammainfluenzavirus influenzae	Year_cat	2024-2025	Year_cat2024-2025	6.61929811571328	-1.12075760786928	3.97958936545336	0.191601095312229	0.409850711563215	0.231332214298847	0.37653009348642	NA	abundance	120	5	0.443602665108552
s__Gyrovirus homsa2	Year_cat	2024-2025	Year_cat2024-2025	-3.60719633035885	-1.12075760786928	1.57260167848185	0.192422212189855	0.409850711563215	0.347818116635672	0.493084347885825	NA	abundance	120	7	0.443602665108552
s__Mamastrovirus 6	Year_cat	2024-2025	Year_cat2024-2025	-0.428736315005541	-1.12075760786928	0.481007000626417	0.192571699582007	0.409850711563215	0.348059539684112	0.493084347885825	NA	abundance	120	95	0.443602665108552
s__Gammapapillomavirus 27	Year_cat	2024-2025	Year_cat2024-2025	0.917250843994928	-1.12075760786928	1.48967053054908	0.198114845253577	0.413839898974139	0.00802252666366816	0.0331742318794927	NA	abundance	120	16	0.448365176100201
s__Alphapapillomavirus 2	Year_cat	2024-2025	Year_cat2024-2025	-2.00532785639131	-1.12075760786928	0.678380098263182	0.218726497973463	0.438020524405364	1.39815480488898e-06	2.03731128712394e-05	NA	abundance	120	61	0.474211581918289
s__Alphatorquevirus homin10	Year_cat	2024-2025	Year_cat2024-2025	-3.6447350775467	-1.12075760786928	1.83961517973436	0.220563526473623	0.438020524405364	0.252452794086505	0.39817090845073	NA	abundance	120	9	0.474211581918289
s__Betapapillomavirus 4	Year_cat	2024-2025	Year_cat2024-2025	-1.95268998588834	-1.12075760786928	0.627955995090244	0.219566099774305	0.438020524405364	5.67991498332708e-06	6.95221593959234e-05	NA	abundance	120	41	0.474211581918289
s__Enterovirus D	Year_cat	2024-2025	Year_cat2024-2025	-10.4198220920763	-1.12075760786928	7.51479485510481	0.24418738363848	0.472721254131186	0.0368675367700945	0.11169768565989	NA	abundance	120	13	0.516396270317441
s__Cytomegalovirus humanbeta5	Year_cat	2024-2025	Year_cat2024-2025	-0.0510492759184543	-1.12075760786928	0.935929350482317	0.274336156182547	0.516895748260269	0.47341198577608	0.625174137778141	NA	abundance	120	44	0.56496803086377
s__Gammapapillomavirus 10	Year_cat	2024-2025	Year_cat2024-2025	-3.01264852623474	-1.12075760786928	1.69128669585283	0.275914619724167	0.516895748260269	0.000124953135194801	0.00100620156235813	NA	abundance	120	29	0.56496803086377
s__Betapolyomavirus quartihominis	Year_cat	2024-2025	Year_cat2024-2025	1.08674077629145	-1.12075760786928	1.95980854518402	0.287461964512612	0.528106019495483	0.492289547983774	0.635614353092974	NA	abundance	120	13	0.579415522220734
s__Rhinovirus B	Year_cat	2024-2025	Year_cat2024-2025	-0.342902851092139	-1.12075760786928	0.726458298492258	0.306182870534859	0.548928470741077	0.142033562796349	0.262130671347678	NA	abundance	120	54	0.607655235369182
s__Alphatorquevirus homin13	Year_cat	2024-2025	Year_cat2024-2025	0.497236489896773	-1.12075760786928	1.56228247619443	0.322525277407995	0.572025963704745	0.15699254344272	0.277686232910244	NA	abundance	120	15	0.625827184726146
s__Hetorquevirus hominid2	Year_cat	2024-2025	Year_cat2024-2025	0.612821704310425	-1.12075760786928	1.60960417917073	0.325042026175595	0.572886571134487	0.497350369122876	0.639450474586555	NA	abundance	120	9	0.625827184726146
s__Gammapapillomavirus 7	Year_cat	2024-2025	Year_cat2024-2025	-1.80309193311162	-1.12075760786928	0.694027989569906	0.350794731923272	0.601362397582752	8.32218745922256e-10	2.12215780210175e-08	NA	abundance	120	53	0.660574571142184
s__Human respiratory circular DNA virus	Year_cat	2024-2025	Year_cat2024-2025	-1.5585483466287	-1.12075760786928	0.410506570426859	0.353330584564424	0.603874089982834	0.000121757588173777	0.00100620156235813	NA	abundance	120	72	0.660574571142184
s__Betapapillomavirus 5	Year_cat	2024-2025	Year_cat2024-2025	-2.27731019451663	-1.12075760786928	1.23166966078286	0.36347982494709	0.613220307547988	0.000109047364603367	0.000953385530532294	NA	abundance	120	26	0.669841391688209
s__Mamastrovirus 9	Year_cat	2024-2025	Year_cat2024-2025	-0.611216504263304	-1.12075760786928	0.531821521935953	0.373700643799874	0.623571488470795	6.48384437769147e-05	0.000601229205931391	NA	abundance	120	69	0.678977226058926
s__SEN virus	Year_cat	2024-2025	Year_cat2024-2025	0.475111664284632	-1.12075760786928	1.69011871264828	0.382766879399697	0.629389271082883	0.533096652149573	0.668555637531841	NA	abundance	120	9	0.685790658924457
s__Orthopneumovirus hominis	Year_cat	2024-2025	Year_cat2024-2025	-4.50449867745957	-1.12075760786928	3.88565174610981	0.399268218678315	0.646663276055745	0.032801946429591	0.104556204244321	NA	abundance	120	16	0.705556167253461
s__Alphatorquevirus homin5	Year_cat	2024-2025	Year_cat2024-2025	1.80432813051226	-1.12075760786928	2.87743243454131	0.415932548311655	0.664616889516245	0.640181856481843	0.73095391075912	NA	abundance	120	5	0.715280848232173
s__Varicellovirus humanalpha3	Year_cat	2024-2025	Year_cat2024-2025	-3.4986564741352	-1.12075760786928	2.77333703230944	0.415974755317792	0.664616889516245	0.658914513573887	0.746769782050405	NA	abundance	120	11	0.715280848232173
s__Protoparvovirus primate1	Year_cat	2024-2025	Year_cat2024-2025	-0.575357123388796	-1.12075760786928	0.604033483288759	0.421405771051513	0.667620378856891	0.665228718227506	0.750087270455515	NA	abundance	120	10	0.715280848232173
s__Roseolovirus humanbeta6a	Year_cat	2024-2025	Year_cat2024-2025	0.753018484354333	-1.12075760786928	2.29178209377409	0.437124924686194	0.675447828830174	0.0412768304372263	0.118762265602273	NA	abundance	120	11	0.722511768340926
s__Astrovirus VA3	Year_cat	2024-2025	Year_cat2024-2025	-0.512638886057888	-1.12075760786928	0.751882099579054	0.439087773044949	0.676627060102052	0.63340558851367	0.730476051454677	NA	abundance	120	34	0.722511768340926
s__Alphatorquevirus homin15	Year_cat	2024-2025	Year_cat2024-2025	-0.0446368458505562	-1.12075760786928	1.27712356739511	0.445241311359996	0.682380705453907	0.692242797378423	0.76967363019551	NA	abundance	120	8	0.722511768340926
s__Alphapapillomavirus 10	Year_cat	2024-2025	Year_cat2024-2025	-0.658293666932776	-1.12075760786928	0.573062466683701	0.448069313699799	0.68300295385591	3.62989710511217e-05	0.000358305972311073	NA	abundance	120	62	0.722511768340926
s__TTV-like mini virus	Year_cat	2024-2025	Year_cat2024-2025	-1.65326796810151	-1.12075760786928	0.675240253667351	0.454361881935681	0.688871240354097	0.454361881935681	0.607138584595277	NA	abundance	120	46	0.723613367527196
s__Alphapapillomavirus 13	Year_cat	2024-2025	Year_cat2024-2025	-2.14647385693493	-1.12075760786928	1.32572248130746	0.467343757816139	0.701015636724209	0.156894939437146	0.277686232910244	NA	abundance	120	10	0.735211521442463
s__Anellovirus D_HF7_66	Year_cat	2024-2025	Year_cat2024-2025	-1.82801299236224	-1.12075760786928	0.998494926544394	0.49239699288619	0.71427887639672	0.0482311622178657	0.12723047964368	NA	abundance	120	26	0.741906536040879
s__Astrovirus MLB2	Year_cat	2024-2025	Year_cat2024-2025	-0.721557412685424	-1.12075760786928	0.547362466911975	0.496615073712513	0.714804711159049	0.0159116327301092	0.0601106125359681	NA	abundance	120	65	0.741906536040879
s__Betapapillomavirus 3	Year_cat	2024-2025	Year_cat2024-2025	-1.65154370164382	-1.12075760786928	0.754171978174446	0.497745361363137	0.714804711159049	1.27239202049905e-08	2.99501506363622e-07	NA	abundance	120	63	0.741906536040879
s__Mupapillomavirus 3	Year_cat	2024-2025	Year_cat2024-2025	-2.4309295491967	-1.12075760786928	1.78138635222771	0.495882826176356	0.714804711159049	0.0542082990650026	0.138231162615756	NA	abundance	120	8	0.741906536040879
s__Burkina Faso astrovirus	Year_cat	2024-2025	Year_cat2024-2025	-1.83734999841068	-1.12075760786928	0.859508506804957	0.500355570818267	0.716245030308382	0.75035544438766	0.815711023316888	NA	abundance	120	5	0.741906536040879
s__Alphatorquevirus homin20	Year_cat	2024-2025	Year_cat2024-2025	0.335449315411254	-1.12075760786928	1.81218498125847	0.506964140944797	0.720221096959359	0.423805685089145	0.583770990170205	NA	abundance	120	5	0.743163342975896
s__Anellovirus D_HF6_322	Year_cat	2024-2025	Year_cat2024-2025	-2.20918124449876	-1.12075760786928	1.5743613884536	0.516857605327441	0.725143505981783	0.105285956899868	0.216224851082951	NA	abundance	120	9	0.749153158283594
s__Cardiovirus B	Year_cat	2024-2025	Year_cat2024-2025	-2.44954778055523	-1.12075760786928	2.05254064942856	0.538113565902719	0.740530836008262	0.786660921996899	0.840873700002688	NA	abundance	120	10	0.767058397974779
s__Simplexvirus humanalpha2	Year_cat	2024-2025	Year_cat2024-2025	-0.648019216043099	-1.12075760786928	0.75507564117873	0.545050011367764	0.742531899544491	0.788662587911018	0.840873700002688	NA	abundance	120	56	0.767058397974779
s__Dependoparvovirus primate1	Year_cat	2024-2025	Year_cat2024-2025	-0.177289999532678	-1.12075760786928	1.55052251761804	0.550210032051404	0.745957831915846	0.797688984732801	0.847544546278601	NA	abundance	120	24	0.767058397974779
s__Alphapapillomavirus 11	Year_cat	2024-2025	Year_cat2024-2025	-0.462221998264418	-1.12075760786928	1.08961782681915	0.554585973871412	0.749513354914849	0.0569256452616752	0.139455276642413	NA	abundance	120	30	0.767058397974779
s__Alphapapillomavirus 4	Year_cat	2024-2025	Year_cat2024-2025	-1.44913729046199	-1.12075760786928	0.529381724106702	0.564887967500806	0.75496875277359	0.000184161352593458	0.00140883434733995	NA	abundance	120	98	0.767058397974779
s__Protoparvovirus primate3	Year_cat	2024-2025	Year_cat2024-2025	-0.478520578613849	-1.12075760786928	1.08400960228456	0.563780732182368	0.75496875277359	0.000729190316287415	0.00437514189772449	NA	abundance	120	22	0.767058397974779
s__Parechovirus A	Year_cat	2024-2025	Year_cat2024-2025	-0.769083749072072	-1.12075760786928	0.596632159156705	0.575787446213748	0.758943409979109	0.131922180044521	0.252798416752393	NA	abundance	120	79	0.773714380849724
s__Alphapapillomavirus 14	Year_cat	2024-2025	Year_cat2024-2025	-1.92733528025806	-1.12075760786928	1.60624614232663	0.622857850667616	0.798831756997244	0.00489240293039076	0.0223444074134265	NA	abundance	120	20	0.820337431740548
s__Gammapapillomavirus 20	Year_cat	2024-2025	Year_cat2024-2025	-2.08455461548332	-1.12075760786928	1.91653218892235	0.623202079926928	0.798831756997244	0.00301737980017564	0.0149455061800188	NA	abundance	120	17	0.820337431740548
s__Alphapapillomavirus 7	Year_cat	2024-2025	Year_cat2024-2025	-0.77122843619822	-1.12075760786928	0.712323150009332	0.636662205109894	0.806915693667372	0.000334987804445233	0.00232278437766692	NA	abundance	120	52	0.829590146052286
s__Gammapapillomavirus unclassified	Year_cat	2024-2025	Year_cat2024-2025	-1.90123511933366	-1.12075760786928	1.72037901811152	0.656154430350456	0.813343074104741	0.00220197829993718	0.0120322385675139	NA	abundance	120	19	0.846439215152088
s__Alphatorquevirus homin7	Year_cat	2024-2025	Year_cat2024-2025	-2.26032564200827	-1.12075760786928	2.53192132647189	0.671048163784488	0.822763400814025	0.891790689450443	0.926508540350669	NA	abundance	120	8	0.85708131810098
s__Human mastadenovirus D	Year_cat	2024-2025	Year_cat2024-2025	-0.891725327787718	-1.12075760786928	0.526500551804422	0.685084502989861	0.83453058247577	0.436438518918644	0.58618148020271	NA	abundance	120	80	0.858562462524322
s__Gyrovirus homsa3	Year_cat	2024-2025	Year_cat2024-2025	-1.46000142019531	-1.12075760786928	0.816704632042487	0.688721073061409	0.835519019779871	0.0228052917363313	0.0775379919035264	NA	abundance	120	32	0.858562462524322
s__Human mastadenovirus E	Year_cat	2024-2025	Year_cat2024-2025	0.10838392714058	-1.12075760786928	3.06791901606802	0.693760391581333	0.839096865843419	0.00302817445477504	0.0149455061800188	NA	abundance	120	23	0.858562462524322
s__Metapneumovirus hominis	Year_cat	2024-2025	Year_cat2024-2025	-0.642200073523493	-1.12075760786928	1.18633873396268	0.698829911357006	0.840659556645039	0.0418512306860864	0.118762265602273	NA	abundance	120	11	0.858562462524322
s__Alphapapillomavirus 3	Year_cat	2024-2025	Year_cat2024-2025	-1.36457971555567	-1.12075760786928	0.700204635756486	0.738470461879706	0.879724301935652	2.55211560340278e-07	4.33859652578472e-06	NA	abundance	120	50	0.894275875409625
s__Gammapapillomavirus 5	Year_cat	2024-2025	Year_cat2024-2025	-1.47730721608239	-1.12075760786928	1.060002800589	0.741763710611084	0.880746805862424	1.17688914530521e-06	1.80064039231697e-05	NA	abundance	120	34	0.894275875409625
s__Alphapapillomavirus 5	Year_cat	2024-2025	Year_cat2024-2025	-0.854145720432987	-1.12075760786928	0.965821741615126	0.788108900878143	0.914595514599326	0.0155561632920495	0.0601106125359681	NA	abundance	120	27	0.934029430278399
s__Human cosavirus	Year_cat	2024-2025	Year_cat2024-2025	-0.115061811039137	-1.12075760786928	3.57188641930912	0.792818313610248	0.916290018188894	0.552258389401584	0.680967281409074	NA	abundance	120	7	0.934029430278399
s__Gammapapillomavirus 9	Year_cat	2024-2025	Year_cat2024-2025	-1.38728265869093	-1.12075760786928	1.07090151525976	0.80721133213787	0.918279146236884	8.67012380045755e-06	9.82614030718522e-05	NA	abundance	120	33	0.934029430278399
s__Gammapapillomavirus 24	Year_cat	2024-2025	Year_cat2024-2025	-1.45823784451241	-1.12075760786928	1.41166129540475	0.813938749555684	0.920767515805542	0.000244544488234508	0.00178168127142285	NA	abundance	120	23	0.934029430278399
s__Roseolovirus humanbeta6b	Year_cat	2024-2025	Year_cat2024-2025	-1.33248403786903	-1.12075760786928	0.958100793259412	0.832816495214765	0.926446752073229	0.878089875976856	0.923352240717931	NA	abundance	120	11	0.934029430278399
s__Erythroparvovirus primate1	Year_cat	2024-2025	Year_cat2024-2025	-1.33682186610821	-1.12075760786928	1.11188269559221	0.851847813695503	0.927864085092264	0.710925345607731	0.785354352909623	NA	abundance	120	11	0.934029430278399
s__Gammapapillomavirus 2	Year_cat	2024-2025	Year_cat2024-2025	-1.57744702846657	-1.12075760786928	2.38442967987964	0.852118222918432	0.927864085092264	0.0204179899529542	0.0712462522024021	NA	abundance	120	12	0.934029430278399
s__Hepatovirus A	Year_cat	2024-2025	Year_cat2024-2025	-1.84946522272216	-1.12075760786928	3.28729092888214	0.844757948249699	0.927864085092264	0.634988985905046	0.730476051454677	NA	abundance	120	5	0.934029430278399
s__Salivirus A	Year_cat	2024-2025	Year_cat2024-2025	-1.01852790288533	-1.12075760786928	0.492621896910277	0.848052796722191	0.927864085092264	0.505090219449722	0.646025434341726	NA	abundance	120	68	0.934029430278399
s__Simplexvirus humanalpha1	Year_cat	2024-2025	Year_cat2024-2025	-0.999410419680778	-1.12075760786928	0.602571453604336	0.847686363019471	0.927864085092264	0.898355512705405	0.928705361107614	NA	abundance	120	63	0.934029430278399
s__Alphapapillomavirus 9	Year_cat	2024-2025	Year_cat2024-2025	-1.26645544172433	-1.12075760786928	0.770944471656754	0.854383509867063	0.928463004942242	0.0721713975885667	0.163588501200751	NA	abundance	120	51	0.934029430278399
s__Dependoparvovirus mammalian1	Year_cat	2024-2025	Year_cat2024-2025	-1.45861070982579	-1.12075760786928	1.93089158196349	0.867898985410695	0.933812772522555	0.325717629985198	0.470139597997503	NA	abundance	120	8	0.936447824803108
s__Gammapapillomavirus 12	Year_cat	2024-2025	Year_cat2024-2025	-0.982846804796413	-1.12075760786928	0.915612248947557	0.882553090264915	0.933812772522555	2.78048946026525e-10	9.24320380235599e-09	NA	abundance	120	51	0.936447824803108
s__Gammapapillomavirus 18	Year_cat	2024-2025	Year_cat2024-2025	-1.29772900293971	-1.12075760786928	1.1766579422231	0.883775869854749	0.933812772522555	0.0200952388801496	0.0712462522024021	NA	abundance	120	14	0.936447824803108
s__Torque teno midi virus	Year_cat	2024-2025	Year_cat2024-2025	-0.860926381395714	-1.12075760786928	1.76391901159144	0.885632826557978	0.933812772522555	0.977845091506317	0.987526726075686	NA	abundance	120	14	0.936447824803108
s__Alphapolyomavirus quardecihominis	Year_cat	2024-2025	Year_cat2024-2025	-0.877305863795348	-1.12075760786928	1.79599780277576	0.895040483532708	0.941152725023876	0.0828563671765046	0.181511046083091	NA	abundance	120	12	0.938700994924548
s__Hepatitis E virus	Year_cat	2024-2025	Year_cat2024-2025	-0.995120603119316	-1.12075760786928	1.10947877099785	0.911279263084864	0.950021265027474	0.12463549742779	0.244477321877588	NA	abundance	120	31	0.948024394660867
s__Cosavirus D	Year_cat	2024-2025	Year_cat2024-2025	-1.49815795382946	-1.12075760786928	4.32140018579273	0.9357564386986	0.96660555206229	0.893202677789043	0.926508540350669	NA	abundance	120	6	0.965700644736955
s__Betapolyomavirus tertihominis	Year_cat	2024-2025	Year_cat2024-2025	-1.20047482919421	-1.12075760786928	2.19886063854349	0.974321282852469	0.990016741407873	0.158269320830189	0.278335702149643	NA	abundance	120	5	0.991852017628979
s__Kobuvirus aichi	Year_cat	2024-2025	Year_cat2024-2025	-1.13380197929702	-1.12075760786928	0.419940230210441	0.977729299581888	0.990016741407873	0.613303883529366	0.716301482290023	NA	abundance	120	118	0.991852017628979
s__Alphapapillomavirus 6	Year_cat	2024-2025	Year_cat2024-2025	-1.10771323644154	-1.12075760786928	0.625492038585426	0.984163242298522	0.99431359993017	9.45315596073476e-06	0.000103309490142316	NA	abundance	120	64	0.991852017628979
s__Nupapillomavirus 1	Year_cat	2024-2025	Year_cat2024-2025	-1.10269990253686	-1.12075760786928	2.10109327266435	0.993227542618119	0.996762160207507	0.00316944123922626	0.0153944288762418	NA	abundance	120	19	0.993227542618119
s__Alphainfluenzavirus influenzae	Year_cat	2024-2025	Year_cat2024-2025	NA	NA	NA	NA	NA	0.0256067233441618	0.0861061246517967	No data points have the baseline factor level	abundance	120	17	NA
s__Alphapolyomavirus octihominis	Year_cat	2024-2025	Year_cat2024-2025	NA	NA	NA	NA	NA	0.00635128653061644	0.0278889194201197	contrasts can be applied only to factors with 2 or more levels	abundance	120	16	NA
s__Betainfluenzavirus influenzae	Year_cat	2024-2025	Year_cat2024-2025	NA	NA	NA	NA	NA	0.0225843153299808	0.0775379919035264	No data points have the baseline factor level	abundance	120	11	NA
s__Cardiovirus D	Year_cat	2024-2025	Year_cat2024-2025	NA	NA	NA	NA	NA	0.21545474943206	0.360268597410986	No data points have the baseline factor level	abundance	120	4	NA
s__Deltapolyomavirus undecihominis	Year_cat	2024-2025	Year_cat2024-2025	NA	NA	NA	NA	NA	0.0157957640722594	0.0601106125359681	contrasts can be applied only to factors with 2 or more levels	abundance	120	11	NA
s__Gammapapillomavirus 11	Year_cat	2024-2025	Year_cat2024-2025	NA	NA	NA	NA	NA	0.00603728543177435	0.0271677844429846	contrasts can be applied only to factors with 2 or more levels	abundance	120	19	NA
s__Gammapapillomavirus 13	Year_cat	2024-2025	Year_cat2024-2025	NA	NA	NA	NA	NA	0.011905764342313	0.0479363669572075	contrasts can be applied only to factors with 2 or more levels	abundance	120	15	NA
s__Gammapapillomavirus 14	Year_cat	2024-2025	Year_cat2024-2025	NA	NA	NA	NA	NA	0.0614230845332855	0.146839561462386	contrasts can be applied only to factors with 2 or more levels	abundance	120	5	NA
s__Gammapapillomavirus 16	Year_cat	2024-2025	Year_cat2024-2025	NA	NA	NA	NA	NA	0.102521598462776	0.21197033195682	contrasts can be applied only to factors with 2 or more levels	abundance	120	4	NA
s__Gammapapillomavirus 17	Year_cat	2024-2025	Year_cat2024-2025	NA	NA	NA	NA	NA	0.0568073229311164	0.139455276642413	contrasts can be applied only to factors with 2 or more levels	abundance	120	6	NA
s__Gammapapillomavirus 19	Year_cat	2024-2025	Year_cat2024-2025	NA	NA	NA	NA	NA	0.00747040287587418	0.0317492122224653	contrasts can be applied only to factors with 2 or more levels	abundance	120	16	NA
s__Gammapapillomavirus 22	Year_cat	2024-2025	Year_cat2024-2025	NA	NA	NA	NA	NA	0.0472431684951265	0.126810610171129	contrasts can be applied only to factors with 2 or more levels	abundance	120	7	NA
s__Gammapapillomavirus 23	Year_cat	2024-2025	Year_cat2024-2025	NA	NA	NA	NA	NA	0.0344892478850956	0.107690916865707	contrasts can be applied only to factors with 2 or more levels	abundance	120	7	NA
s__Gammapapillomavirus 26	Year_cat	2024-2025	Year_cat2024-2025	NA	NA	NA	NA	NA	0.126356471408561	0.246274396503309	contrasts can be applied only to factors with 2 or more levels	abundance	120	4	NA
s__Human coronavirus 229E	Year_cat	2024-2025	Year_cat2024-2025	NA	NA	NA	NA	NA	0.0193242532199281	0.0695673115917412	No data points have the baseline factor level	abundance	120	10	NA
s__Human coronavirus HKU1	Year_cat	2024-2025	Year_cat2024-2025	NA	NA	NA	NA	NA	0.143058242206086	0.262130671347678	No data points have the baseline factor level	abundance	120	4	NA
s__Human coronavirus NL63	Year_cat	2024-2025	Year_cat2024-2025	NA	NA	NA	NA	NA	0.0122452387448032	0.0486628968299972	No data points have the baseline factor level	abundance	120	18	NA
s__Human papillomavirus KC5	Year_cat	2024-2025	Year_cat2024-2025	NA	NA	NA	NA	NA	0.0470406945090621	0.126810610171129	contrasts can be applied only to factors with 2 or more levels	abundance	120	8	NA
s__Human parechovirus 1B	Year_cat	2024-2025	Year_cat2024-2025	NA	NA	NA	NA	NA	0.00135793298676379	0.00784014139527773	No data points have the baseline factor level	abundance	120	30	NA
s__Human polyomavirus 16	Year_cat	2024-2025	Year_cat2024-2025	NA	NA	NA	NA	NA	0.112968025031602	0.226615405099724	contrasts can be applied only to factors with 2 or more levels	abundance	120	4	NA
s__Orthorubulavirus hominis	Year_cat	2024-2025	Year_cat2024-2025	NA	NA	NA	NA	NA	0.160653786073101	0.280914620219251	No data points have the baseline factor level	abundance	120	4	NA
s__Papillomavirus homo7424	Year_cat	2024-2025	Year_cat2024-2025	NA	NA	NA	NA	NA	0.113307702549862	0.226615405099724	contrasts can be applied only to factors with 2 or more levels	abundance	120	4	NA
s__Papillomavirus homo8923	Year_cat	2024-2025	Year_cat2024-2025	NA	NA	NA	NA	NA	0.109199477062714	0.221291655504574	contrasts can be applied only to factors with 2 or more levels	abundance	120	4	NA
s__Respirovirus pneumoniae	Year_cat	2024-2025	Year_cat2024-2025	NA	NA	NA	NA	NA	0.0033333437204103	0.0154545936128114	No data points have the baseline factor level	abundance	120	18	NA

## Sheet: TableS8_pos_ctrl
sample_ID	Name	description	Length	Segment	Accession	Assembly	Asm_length	kingdom	phylum	tclass	order	family	genus	species	subspecies	RPKMF	read_count	covered_bases	mean_coverage	avg_read_identity	Pi	filtered_reads_in_sample
TAU_pos_SET6	Coxsackievirus B4	Human coxsackievirus B4 strain Tuscany	7395		DQ480420.1	set:DQ480420	7395	k__Viruses	p__Pisuviricota	c__Pisoniviricetes	o__Picornavirales	f__Picornaviridae	g__Enterovirus	s__Enterovirus B	t__Coxsackievirus B4	49757.3	18747319	7395	363569.14334009466	0.9978013600055182	0.002	50950008
TAU_pos_SET6	Human coronavirus 229E	Human coronavirus 229E	27317		NC_002645.1	GCF_000853505.1	27317	k__Viruses	p__Pisuviricota	c__Pisoniviricetes	o__Nidovirales	f__Coronaviridae	g__Alphacoronavirus	s__Human coronavirus 229E	t__Human coronavirus 229E	308.743	429709	27229	2258.36797598565	0.9982669546960726	0.001	50950008
TAU_pos_SET6	Human fecal virus Jorvi2	Human fecal virus Jorvi2	3925		NC_035212.1	GCF_002219885.1	3925	k__Viruses	p__Cressdnaviricota	c__Arfiviricetes	o__Cirlivirales	f__Circoviridae	g__Unclassified Circoviridae	s__Human fecal virus Jorvi2	t__Human fecal virus Jorvi2	14.9766	2995	3774	108.75592356687898	0.960537383864397	0.006	50950008
TAU_pos_SET6	JC polyomavirus	JC polyomavirus	5130		NC_001699.1	GCF_000863805.1	5130	k__Viruses	p__Cossaviricota	c__Papovaviricetes	o__Sepolyvirales	f__Polyomaviridae	g__Betapolyomavirus	s__Betapolyomavirus secuhominis	t__JC polyomavirus	12.7672	3337	4940	93.69746588693957	0.9917718597939285	0.002	50950008
TAU_pos_SET6	Human bocavirus 3	Human bocavirus 3	5242		NC_012564.1	GCF_000882855.1	5242	k__Viruses	p__Cossaviricota	c__Quintoviricetes	o__Piccovirales	f__Parvoviridae	g__Bocaparvovirus	s__Bocaparvovirus primate1	t__Human bocavirus 3	10.8095	2887	5242	79.29473483403281	0.9972659477650273	0.0	50950008
TAU_pos_SET6	Astrovirus MLB1	Astrovirus MLB1	6171		NC_011400.1	GCF_000880715.1	6171	k__Viruses	p__Pisuviricota	c__Stelpaviricetes	o__Stellavirales	f__Astroviridae	g__Mamastrovirus	s__Mamastrovirus 6	t__Astrovirus MLB1	7.50288	2359	6154	54.896127045859664	0.9578841325485974	0.0	50950008
TAU_pos_SET6	Human bocavirus 2	Human bocavirus 2 strain BJQ435	5307		JX257046.1	set:JX257046	5307	k__Viruses	p__Cossaviricota	c__Quintoviricetes	o__Piccovirales	f__Parvoviridae	g__Bocaparvovirus	s__Bocaparvovirus primate2	t__Human bocavirus 2	6.89	1863	5256	50.29489353683814	0.9711559623238222	0.0	50950008
TAU_pos_SET6	Betapolyomavirus hominis	BK polyomavirus	5153		NC_001538.1	GCF_000837865.1	5153	k__Viruses	p__Cossaviricota	c__Papovaviricetes	o__Sepolyvirales	f__Polyomaviridae	g__Betapolyomavirus	s__Betapolyomavirus hominis	t__Betapolyomavirus hominis	5.2867	1388	4992	39.09897147292839	0.9843088126403624	0.0	50950008
TAU_pos_SET6	Porcine stool-associated circular virus 4	Porcine stool-associated circular virus 4 isolate CP2	2980		NC_023877.1	GCF_000919035.1	2980	k__Viruses	p__Cressdnaviricota	c__Arfiviricetes	o__Cirlivirales	f__Circoviridae	g__Unclassified Circoviridae	s__Porcine stool-associated circular virus 4	t__Porcine stool-associated circular virus 4	2.09443	318	2643	14.891946308724831	0.9665912181973496	0.0	50950008
TAU_pos_SET6	Canine astrovirus	Canine astrovirus strain HUN/2012/135	6571		KX599353.1	set:KX599353	6571	k__Viruses	p__Pisuviricota	c__Stelpaviricetes	o__Stellavirales	f__Astroviridae	g__Mamastrovirus	s__Canine astrovirus	t__Canine astrovirus	1.89371	634	5690	13.766245624714655	0.9687501454803171	0.002	50950008
TAU_pos_SET6	aichivirus A1	Aichivirus A1 strain A_RIVM_R04-15/Hu/NL/2019	8252		OP255993.1	acc:OP255993.1	8252	k__Viruses	p__Pisuviricota	c__Pisoniviricetes	o__Picornavirales	f__Picornaviridae	g__Kobuvirus	s__Kobuvirus aichi	t__aichivirus A1	1.79574	755	7508	12.972855065438681	0.9584229072579425	0.001	50950008
TAU_pos_SET6	Canine parvovirus	Canine parvovirus	5323		NC_001539.1	GCF_000848925.1	5323	k__Viruses	p__Cossaviricota	c__Quintoviricetes	o__Piccovirales	f__Parvoviridae	g__Protoparvovirus	s__Protoparvovirus carnivoran1	t__Canine parvovirus	1.42327	386	4354	10.406161938756341	0.9855076150003483	0.0	50950008
TAU_pos_SET6	Human parechovirus 1B	Human parechovirus 1B strain HPeV-1B/USA/WA-UW-6bd44/2021	7268		OR728261.1	acc:OR728261.1	7268	k__Viruses	p__Pisuviricota	c__Pisoniviricetes	o__Picornavirales	f__Picornaviridae	g__Parechovirus	s__Human parechovirus 1B	t__Human parechovirus 1B	1.35294	501	3798	9.974545954870665	0.9653486775536397	0.001	50950008
TAU_pos_SET6	Merkel cell polyomavirus	Merkel cell polyomavirus isolate R17b	5387		NC_010277.2	GCF_000874865.1	5387	k__Viruses	p__Cossaviricota	c__Papovaviricetes	o__Sepolyvirales	f__Polyomaviridae	g__Alphapolyomavirus	s__Alphapolyomavirus quintihominis	t__Merkel cell polyomavirus	1.31527	361	4111	9.66771858177093	0.9972016338033929	0.0	50950008
TAU_pos_SET6	Human circovirus VS6600022	Human circovirus VS6600022	2836		NC_024694.1	GCF_000924015.1	2836	k__Viruses	p__Cressdnaviricota	c__Arfiviricetes	o__Cirlivirales	f__Circoviridae	g__Circovirus	s__Human circovirus VS6600022	t__Human circovirus VS6600022	1.25957	182	2364	9.31064880112835	0.9780271148044196	0.0	50950008
TAU_pos_SET6	Human respirovirus 3	Human respirovirus 3 strain HPIV3/Seattle/USA/SC0767/2019	15610		MN306039.1	set:MN306039	15610	k__Viruses	p__Negarnaviricota	c__Monjiviricetes	o__Mononegavirales	f__Paramyxoviridae	g__Respirovirus	s__Respirovirus pneumoniae	t__Human respirovirus 3	0.829845	660	8025	6.162267777065983	0.9735192071788896	0.0	50950008
TAU_pos_SET6	Bocaparvovirus primate1	Primate bocaparvovirus 1 isolate Salvador1	5543		NC_075120.1	GCF_003033285.1	5543	k__Viruses	p__Cossaviricota	c__Quintoviricetes	o__Piccovirales	f__Parvoviridae	g__Bocaparvovirus	s__Bocaparvovirus primate1	t__Bocaparvovirus primate1	0.761289	215	4389	5.44145769438932	0.9913738399193631	0.0	50950008
TAU_pos_SET6	Sapovirus GII	Sapovirus GII GII.3-AK11-P1 RNA	7512		LC715150.1	acc:LC715150.1	7512	k__Viruses	p__Pisuviricota	c__Pisoniviricetes	o__Picornavirales	f__Caliciviridae	g__Sapovirus	s__Sapporo virus	t__Sapovirus GII	0.749863	287	6303	5.569222577209798	0.9572900736919292	0.0	50950008
TAU_pos_SET6	Cucurbit aphid-borne yellows virus	Cucurbit aphid-borne yellows virus isolate PF-799	5672	NA	OP909806.1	acc:OP909806.1	5672	k__Viruses	p__Pisuviricota	c__Pisoniviricetes	o__Sobelivirales	f__Solemoviridae	g__Polerovirus	s__Cucurbit aphid-borne yellows virus	t__Cucurbit aphid-borne yellows virus	0.546735	158	3106	4.105782792665726	0.9508336241787958	0.0	50950008
TAU_pos_SET6	Canine kobuvirus	Canine kobuvirus strain S272/16	8312		MN337880.1	set:MN337880	8312	k__Viruses	p__Pisuviricota	c__Pisoniviricetes	o__Picornavirales	f__Picornaviridae	g__Kobuvirus	s__Canine kobuvirus	t__Canine kobuvirus	0.52893	224	2890	3.803416746871992	0.9563452419117849	0.0	50950008
TAU_pos_SET6	Chicken anemia virus	Chicken anemia virus strain CIAV-Heilongjiang16	2295		MH186137.1	set:MH186137	2295	k__Viruses	p__Unclassified Viruses	c__Unclassified Viruses	o__Unclassified Viruses	f__Anelloviridae	g__Gyrovirus	s__Gyrovirus chickenanemia	t__Chicken anemia virus	0.521678	61	966	3.718954248366013	0.9459806196827054	0.0	50950008
TAU_pos_SET6	Moku virus	Moku virus isolate Big Island	10056		NC_031338.1	GCF_001766585.1	10056	k__Viruses	p__Pisuviricota	c__Pisoniviricetes	o__Picornavirales	f__Iflaviridae	g__Iflavirus	s__Moku virus	t__Moku virus	0.517221	265	6906	3.7118138424821003	0.979036580779032	0.0	50950008
TAU_pos_SET6	Human papillomavirus type 6b	Human papillomavirus type 6b	7902		NC_001355.1	GCF_000861945.1	7902	k__Viruses	p__Cossaviricota	c__Papovaviricetes	o__Zurhausenvirales	f__Papillomaviridae	g__Alphapapillomavirus	s__Alphapapillomavirus 10	t__Human papillomavirus type 6b	0.499246	201	3669	3.646038977474057	0.9842489411701572	0.0	50950008
TAU_pos_SET6	Canine bocavirus 1	Canine bocavirus 1 isolate Con-161	5413		NC_020499.1	GCF_000905315.1	5413	k__Viruses	p__Cossaviricota	c__Quintoviricetes	o__Piccovirales	f__Parvoviridae	g__Bocaparvovirus	s__Bocaparvovirus carnivoran2	t__Canine bocavirus 1	0.493125	136	4051	3.539811564751524	0.976070375324654	0.0	50950008
TAU_pos_SET6	Bovine rotavirus A	Bovine rotavirus A isolate bovine-tc/USA/NCDV/1971/G6P[1] segment 6 VP6 protein gene	1194	6	JF693031.1	set:832cf24ae7abbe2b9a1fb51db9b8cbcb522fbbb0	17421	k__Viruses	p__Duplornaviricota	c__Resentoviricetes	o__Reovirales	f__Sedoreoviridae	g__Rotavirus	s__Rotavirus A	t__G6	0.460267	28	288	3.5117252931323284	0.9854307885674408	0.0	50950008
TAU_pos_SET6	Torque teno sus virus 1b	Torque teno sus virus 1b isolate RS/5	2906		MH170066.1	set:MH170066	2906	k__Viruses	p__Unclassified Viruses	c__Unclassified Viruses	o__Unclassified Viruses	f__Anelloviridae	g__Iotatorquevirus	s__Torque teno sus virus 1b	t__Torque teno sus virus 1b	0.452517	67	396	3.397109428768066	0.9849080027799241	0.0	50950008
TAU_pos_SET6	Bovine rotavirus A	Bovine rotavirus A isolate bovine-tc/USA/NCDV/1971/G6P[1] segment 5 NSP1 protein gene	1476	5	JF693030.1	set:832cf24ae7abbe2b9a1fb51db9b8cbcb522fbbb0	17421	k__Viruses	p__Duplornaviricota	c__Resentoviricetes	o__Reovirales	f__Sedoreoviridae	g__Rotavirus	s__Rotavirus A	t__G6	0.452114	34	524	3.0548780487804876	0.9671715716334052	0.0	50950008
TAU_pos_SET6	Torque teno virus	MAG: Torque teno virus isolate SAfiA-716-1	3451		MN768561.1	acc:MN768561.1	3451	k__Viruses	p__Unclassified Viruses	c__Unclassified Viruses	o__Unclassified Viruses	f__Anelloviridae	g__Unclassified Anelloviridae	s__Torque teno virus	t__Torque teno virus	0.392428	69	335	2.902926687916546	0.9686585507439731	0.0	50950008
TAU_pos_SET6	Avian gyrovirus 2	Avian gyrovirus 2	2383		NC_015396.1	GCF_000891935.1	2383	k__Viruses	p__Unclassified Viruses	c__Unclassified Viruses	o__Unclassified Viruses	f__Anelloviridae	g__Gyrovirus	s__Gyrovirus galga1	t__Avian gyrovirus 2	0.362397	44	957	2.6856903063365505	0.9518549009153895	0.0	50950008
TAU_pos_SET6	Torque teno virus	Torque teno virus DNA, isolate: JT14F	3626		AB064601.1	set:AB064601	3626	k__Viruses	p__Unclassified Viruses	c__Unclassified Viruses	o__Unclassified Viruses	f__Anelloviridae	g__Unclassified Anelloviridae	s__Torque teno virus	t__Torque teno virus	0.35725	66	988	2.606177606177606	0.9748520604654848	0.0	50950008
TAU_pos_SET6	Parvovirus NIH-CQV	Parvovirus NIH-CQV putative 15-kDa protein, putative replication associated protein (rep), and putative capsid protein (cap) genes	3780		NC_022089.1	GCF_000910875.1	3780	k__Viruses	p__Cossaviricota	c__Quintoviricetes	o__Piccovirales	f__Parvoviridae	g__Unclassified Parvoviridae	s__Parvovirus NIH-CQV	t__Parvovirus NIH-CQV	0.347887	67	1605	2.2955026455026455	0.9860579781907491	0.0	50950008
TAU_pos_SET6	White clover mottle virus	White clover mottle virus genomic RNA, strain: CD	6205	NA	NC_031747.1	GCF_001866835.1	6205	k__Viruses	p__Pisuviricota	c__Pisoniviricetes	o__Sobelivirales	f__Solemoviridae	g__Polerovirus	s__White clover mottle virus	t__White clover mottle virus	0.335289	106	2093	2.4547945205479453	0.954647467886115	0.0	50950008
TAU_pos_SET6	Human papillomavirus 65	Human papillomavirus type 65 complete genome	7308		X70829.1	set:X70829	7308	k__Viruses	p__Cossaviricota	c__Papovaviricetes	o__Zurhausenvirales	f__Papillomaviridae	g__Gammapapillomavirus	s__Gammapapillomavirus 1	t__Human papillomavirus 65	0.308855	115	3956	2.238232074438971	0.9961076011490643	0.0	50950008
TAU_pos_SET6	Feline bocaparvovirus 2	Feline bocavirus 2 isolate POR1	5479		NC_022800.1	GCF_000911415.1	5479	k__Viruses	p__Cossaviricota	c__Quintoviricetes	o__Piccovirales	f__Parvoviridae	g__Bocaparvovirus	s__Bocaparvovirus carnivoran4	t__Feline bocaparvovirus 2	0.297326	83	2921	2.1611607957656505	0.9866803475016485	0.0	50950008
TAU_pos_SET6	Human coronavirus OC43	Human coronavirus OC43 strain ATCC VR-759	30741		NC_006213.1	GCF_003972325.1	30741	k__Viruses	p__Pisuviricota	c__Pisoniviricetes	o__Nidovirales	f__Coronaviridae	g__Betacoronavirus	s__Betacoronavirus 1	t__Human coronavirus OC43	0.292417	458	5786	2.1572167463647896	0.9880160912068051	0.0	50950008
TAU_pos_SET6	Turnip yellows virus	Turnip yellows virus genome assembly: monopartite	5719	NA	LR584020.1	set:LR584020	5719	k__Viruses	p__Pisuviricota	c__Pisoniviricetes	o__Sobelivirales	f__Solemoviridae	g__Polerovirus	s__Turnip yellows virus	t__Turnip yellows virus	0.247097	72	1365	1.7487322958559188	0.9694428595462541	0.0	50950008
TAU_pos_SET6	Mammalian orthoreovirus	Mammalian orthoreovirus isolate WIV4 mu-NS gene	2223	6	KT444537.1	set:16778583d5a235bf221fa3141ecb385a5314f97a	23557	k__Viruses	p__Duplornaviricota	c__Resentoviricetes	o__Reovirales	f__Spinareoviridae	g__Orthoreovirus	s__Mammalian orthoreovirus	t__T2	0.220727	25	505	1.6648672964462439	0.9642363822753016	0.0	50950008
TAU_pos_SET6	Feline coronavirus	Feline coronavirus strain ZJU1709	29303		MT239440.1	acc:MT239440.1	29303	k__Viruses	p__Pisuviricota	c__Pisoniviricetes	o__Nidovirales	f__Coronaviridae	g__Alphacoronavirus	s__Alphacoronavirus 1	t__Feline coronavirus	0.220363	329	3569	1.647510493806095	0.9516806632646796	0.0	50950008
TAU_pos_SET6	Torque teno virus	Torque teno virus isolate M265	3817		MK452766.1	set:MK452766	3817	k__Viruses	p__Unclassified Viruses	c__Unclassified Viruses	o__Unclassified Viruses	f__Anelloviridae	g__Unclassified Anelloviridae	s__Torque teno virus	t__Torque teno virus	0.215965	42	387	1.5009169504846738	0.9843178700560374	0.0	50950008
TAU_pos_SET6	Human papillomavirus 134	Human papillomavirus type 134	7309		NC_014956.1	GCF_000889695.1	7309	k__Viruses	p__Cossaviricota	c__Papovaviricetes	o__Zurhausenvirales	f__Papillomaviridae	g__Gammapapillomavirus	s__Gammapapillomavirus 7	t__Human papillomavirus 134	0.190658	71	1570	1.3811738951977015	0.9951663682634738	0.0	50950008
TAU_pos_SET6	rhinovirus B83	Rhinovirus B83 strain SC0340	7077		MN306025.1	set:MN306025	7077	k__Viruses	p__Pisuviricota	c__Pisoniviricetes	o__Picornavirales	f__Picornaviridae	g__Enterovirus	s__Rhinovirus B	t__rhinovirus B83	0.183042	66	1576	1.2779426310583581	0.9870212994860975	0.0	50950008
TAU_pos_SET6	Canine circovirus	Canine circovirus strain ITA/2021/cat/99.95	2066		OQ357581.1	acc:OQ357581.1	2066	k__Viruses	p__Cressdnaviricota	c__Arfiviricetes	o__Cirlivirales	f__Circoviridae	g__Circovirus	s__Circovirus canine	t__Circovirus canine	0.180501	19	706	1.3794772507260407	0.9467227902514734	0.0	50950008
TAU_pos_SET6	Human papillomavirus 16	Human papillomavirus type 16	7906		NC_001526.4	GCF_000863945.3	7906	k__Viruses	p__Cossaviricota	c__Papovaviricetes	o__Zurhausenvirales	f__Papillomaviridae	g__Alphapapillomavirus	s__Alphapapillomavirus 9	t__Human papillomavirus type 16	0.178744	72	334	1.1415380723501138	0.9996376811594203	0.0	50950008
TAU_pos_SET6	Molluscum contagiosum virus subtype 1	Molluscum contagiosum virus subtype 1	190289		NC_001731.1	GCF_000843325.1	190289	k__Viruses	p__Nucleocytoviricota	c__Pokkesviricetes	o__Chitovirales	f__Poxviridae	g__Molluscipoxvirus	s__Molluscum contagiosum virus	t__Molluscum contagiosum virus subtype 1	0.176788	1714	45207	1.2717393017988428	0.98730102132921	0.0	50950008
TAU_pos_SET6	Human papillomavirus 4	Human papillomavirus type 4	7353		NC_001457.1	GCF_000864845.1	7353	k__Viruses	p__Cossaviricota	c__Papovaviricetes	o__Zurhausenvirales	f__Papillomaviridae	g__Gammapapillomavirus	s__Gammapapillomavirus 1	t__Human papillomavirus 4	0.170833	64	2557	1.2785257717938256	0.997525590053416	0.0	50950008
TAU_pos_SET6	Human papillomavirus type 27b	Human papillomavirus type 27b DNA	7831		AB211993.1	set:AB211993	7831	k__Viruses	p__Cossaviricota	c__Papovaviricetes	o__Zurhausenvirales	f__Papillomaviridae	g__Alphapapillomavirus	s__Alphapapillomavirus 4	t__Human papillomavirus type 27b	0.170431	68	2919	1.2244924019920826	0.9965684739675228	0.0	50950008
TAU_pos_SET6	Human papillomavirus type 57b	Human papillomavirus type 57b complete genome	7868		U37537.1	set:U37537	7868	k__Viruses	p__Cossaviricota	c__Papovaviricetes	o__Zurhausenvirales	f__Papillomaviridae	g__Alphapapillomavirus	s__Alphapapillomavirus 4	t__Human papillomavirus type 57b	0.139695	56	1069	1.0210981189628876	0.9580939093468885	0.0	50950008
TAU_pos_SET6	Feline bocavirus	Feline bocavirus	5331		NC_017823.1	GCF_000896155.1	5331	k__Viruses	p__Cossaviricota	c__Quintoviricetes	o__Piccovirales	f__Parvoviridae	g__Bocaparvovirus	s__Bocaparvovirus carnivoran3	t__Feline bocavirus	0.136222	37	1307	0.9452260363909211	0.9664970493111956	0.0	50950008
TAU_pos_SET6	Torque teno virus	Torque teno virus complete genome, isolate TTV-HD18b (uro705)	3860		FR751490.1	set:FR751490	3860	k__Viruses	p__Unclassified Viruses	c__Unclassified Viruses	o__Unclassified Viruses	f__Anelloviridae	g__Unclassified Anelloviridae	s__Torque teno virus	t__Torque teno virus	0.127118	25	517	0.9404145077720207	0.9628884844442323	0.0	50950008
TAU_pos_SET6	Tomato brown rugose fruit virus	Tomato brown rugose fruit virus isolate Tom1-Jo	6393		NC_028478.1	GCF_001461485.1	6393	k__Viruses	p__Kitrinoviricota	c__Alsuviricetes	o__Martellivirales	f__Virgaviridae	g__Tobamovirus	s__Tomato brown rugose fruit virus	t__Tomato brown rugose fruit virus	0.122804	40	2006	0.8438917566087909	0.9954870772789939	0.0	50950008
TAU_pos_SET6	human papillomavirus 118	Human papillomavirus type 118 clone K2	7597		GQ246951.1	set:GQ246951	7597	k__Viruses	p__Cossaviricota	c__Papovaviricetes	o__Zurhausenvirales	f__Papillomaviridae	g__Betapapillomavirus	s__Betapapillomavirus 1	t__human papillomavirus 118	0.121426	47	850	0.9281295248124259	0.9940664655322465	0.0	50950008
TAU_pos_SET6	Human papillomavirus 5	Human papillomoavirus type 5	7746		NC_001531.1	GCF_000866505.1	7746	k__Viruses	p__Cossaviricota	c__Papovaviricetes	o__Zurhausenvirales	f__Papillomaviridae	g__Betapapillomavirus	s__Betapapillomavirus 1	t__Human papillomavirus 5	0.11909	47	914	0.8969790859798605	0.9803350417619819	0.0	50950008
TAU_pos_SET6	Human papillomavirus 107	Human papillomavirus type 107	7562		EF422221.1	set:EF422221	7562	k__Viruses	p__Cossaviricota	c__Papovaviricetes	o__Zurhausenvirales	f__Papillomaviridae	g__Betapapillomavirus	s__Betapapillomavirus 2	t__Human papillomavirus 107	0.116797	45	1609	0.8627347262628934	0.9906411088021857	0.0	50950008
TAU_pos_SET6	Human respiratory circular DNA virus	Human respiratory circular DNA virus strain 181955	3058		MN535741.1	acc:MN535741.1	3058	k__Viruses	p__Cressdnaviricota	c__Arfiviricetes	o__Cirlivirales	f__Circoviridae	g__Unclassified Circoviridae	s__Human respiratory circular DNA virus	t__Human respiratory circular DNA virus	0.109111	17	428	0.789404839764552	0.9620789204534704	0.0	50950008
TAU_pos_SET6	human papillomavirus 20	Human papillomavirus type 20	7757		U31778.1	set:U31778	7757	k__Viruses	p__Cossaviricota	c__Papovaviricetes	o__Zurhausenvirales	f__Papillomaviridae	g__Betapapillomavirus	s__Betapapillomavirus 1	t__human papillomavirus 20	0.1088	43	889	0.7655021271109965	0.9980997619568712	0.0	50950008
TAU_pos_SET6	rhinovirus A24	Rhinovirus A24 strain RvA24/USA/2021/GSDN4Y	7132		OK649393.1	acc:OK649393.1	7132	k__Viruses	p__Pisuviricota	c__Pisoniviricetes	o__Picornavirales	f__Picornaviridae	g__Enterovirus	s__Rhinovirus A	t__rhinovirus A24	0.107327	39	579	0.8156197420078519	0.9709980893812817	0.0	50950008
TAU_pos_SET6	Bat circovirus ZS/China/2011	Bat circovirus ZS/China/2011 isolate YN-BtCV-3	1743		JF938080.1	set:JF938080	1743	k__Viruses	p__Cressdnaviricota	c__Arfiviricetes	o__Cirlivirales	f__Circoviridae	g__Cyclovirus	s__Cyclovirus vazka	t__Cyclovirus vazka	0.101345	9	324	0.7395295467584624	0.9317762359234512	0.0	50950008
TAU_pos_SET6	Severe acute respiratory syndrome coronavirus 2	SARS-CoV-2 Delta-AY.113	29815	NA	OK540327.1	acc:OK540327.1	29815	k__Viruses	p__Pisuviricota	c__Pisoniviricetes	o__Nidovirales	f__Coronaviridae	g__Betacoronavirus	s__Severe acute respiratory syndrome-related coronavirus	t__SARS-CoV-2_Delta	0.0941363	143	3535	0.6567834982391414	0.9993365972461553	0.0	50950008
TAU_pos_SET6	Human picobirnavirus	Human picobirnavirus RNA segment 1, complete sequence	2525	1	NC_007026.1	GCF_000859285.1	4270	k__Viruses	p__Pisuviricota	c__Duplopiviricetes	o__Durnavirales	f__Picobirnaviridae	g__Orthopicobirnavirus	s__Orthopicobirnavirus hominis	t__Orthopicobirnavirus hominis	0.0932772	12	615	0.6570297029702971	0.9664839723520978	0.0	50950008
TAU_pos_SET6	Rat minute virus	Rat minute virus isolate NTU1	4783		JX627317.1	set:JX627317	4783	k__Viruses	p__Cossaviricota	c__Quintoviricetes	o__Piccovirales	f__Parvoviridae	g__Protoparvovirus	s__Rat minute virus	t__Rat minute virus	0.0902772	22	301	0.6140497595651265	0.9817110392529174	0.0	50950008
TAU_pos_SET6	MW polyomavirus	MW polyomavirus isolate Pool1	5026		OP910239.1	acc:OP910239.1	5026	k__Viruses	p__Cossaviricota	c__Papovaviricetes	o__Sepolyvirales	f__Polyomaviridae	g__Deltapolyomavirus	s__Deltapolyomavirus decihominis	t__MW polyomavirus	0.0898175	23	543	0.6418623159570235	0.9886110115650643	0.0	50950008
TAU_pos_SET6	Human mastadenovirus D	Human adenovirus D	35083		NC_010956.1	GCF_000845985.1	35083	k__Viruses	p__Preplasmiviricota	c__Tectiliviricetes	o__Rowavirales	f__Adenoviridae	g__Mastadenovirus	s__Human mastadenovirus D	t__Human mastadenovirus D	0.0883926	158	1016	0.5787418407775846	0.9730962990423808	0.0	50950008
TAU_pos_SET6	rhinovirus A31	Rhinovirus A31 isolate RV-A31/USA/4T3/2009	7124		OQ791521.1	acc:OQ791521.1	7124	k__Viruses	p__Pisuviricota	c__Pisoniviricetes	o__Picornavirales	f__Picornaviridae	g__Enterovirus	s__Rhinovirus A	t__rhinovirus A31	0.0881621	32	1029	0.6713924761370017	0.9779693843683913	0.0	50950008
TAU_pos_SET6	Aphid lethal paralysis virus	Aphid lethal paralysis virus isolate ALPV-CE	9837		MK704471.1	set:MK704471	9837	k__Viruses	p__Pisuviricota	c__Pisoniviricetes	o__Picornavirales	f__Dicistroviridae	g__Cripavirus	s__Cripavirus mortiferum	t__Aphid lethal paralysis virus	0.0877901	44	701	0.5630781742401139	0.9189995131047785	0.0	50950008
TAU_pos_SET6	MW polyomavirus	MW polyomavirus	4927		NC_018102.1	GCF_000898335.1	4927	k__Viruses	p__Cossaviricota	c__Papovaviricetes	o__Sepolyvirales	f__Polyomaviridae	g__Deltapolyomavirus	s__Deltapolyomavirus decihominis	t__MW polyomavirus	0.0876387	22	1017	0.6640957986604424	0.9858458759783265	0.0	50950008
TAU_pos_SET6	Human astrovirus 1	Human astrovirus type 1 strain Dresden	6777		AY720892.1	set:AY720892	6777	k__Viruses	p__Pisuviricota	c__Stelpaviricetes	o__Stellavirales	f__Astroviridae	g__Mamastrovirus	s__Mamastrovirus 1	t__Human astrovirus 1	0.0868839	30	716	0.6309576508779696	0.97510036769539	0.0	50950008
TAU_pos_SET6	Betapapillomavirus 1	Betapapillomavirus 1 isolate Beta01_HIVGc36	7550		MF588677.1	set:MF588677	7550	k__Viruses	p__Cossaviricota	c__Papovaviricetes	o__Zurhausenvirales	f__Papillomaviridae	g__Betapapillomavirus	s__Betapapillomavirus 1	t__Betapapillomavirus 1	0.0857872	33	1115	0.6459602649006623	0.9683108135287122	0.0	50950008
TAU_pos_SET6	Human rotavirus A	Human rotavirus A RVA/Human-wt/VNM/RVN18.0197/2018/G9P[8] VP4 gene for VP4 protein	2329	4	LC491463.1	set:1137bb10e3ca3c91fa3ba986b7c0baae2d6d8a41	17806	k__Viruses	p__Duplornaviricota	c__Resentoviricetes	o__Reovirales	f__Sedoreoviridae	g__Rotavirus	s__Rotavirus A	t__G9P[8]	0.0842726	10	137	0.5805066552168313	0.9629784805613821	0.0	50950008
TAU_pos_SET6	Bocavirus pig/SX/China/2010	Bocavirus pig/SX/China/2010 NS1 (NS1), NP1 (NP1), VP1 (VP1), and VP2 (VP2) genes	4786		NC_038537.1	GCF_002827285.1	4786	k__Viruses	p__Cossaviricota	c__Quintoviricetes	o__Piccovirales	f__Parvoviridae	g__Bocaparvovirus	s__Bocaparvovirus ungulate3	t__Bocavirus pig/SX/China/2010	0.0779178	19	714	0.5936063518595904	0.9862671198061662	0.0	50950008
TAU_pos_SET6	Human papillomavirus 23	Human papillomavirus type 23	7324		U31781.1	set:U31781	7324	k__Viruses	p__Cossaviricota	c__Papovaviricetes	o__Zurhausenvirales	f__Papillomaviridae	g__Betapapillomavirus	s__Betapapillomavirus 2	t__Human papillomavirus 23	0.0750353	28	884	0.5252594210813762	0.9818803979240698	0.0	50950008
TAU_pos_SET6	Porcine parvovirus 6	Porcine parvovirus 6 strain P15-1 nonstructural protein (QKJ52_gp1) and capsid protein (QKJ52_gp2) genes	5566		NC_075986.1	GCF_013087245.1	5566	k__Viruses	p__Cossaviricota	c__Quintoviricetes	o__Piccovirales	f__Parvoviridae	g__Copiparvovirus	s__Copiparvovirus ungulate4	t__Porcine parvovirus 6	0.0740512	21	349	0.49155587495508446	0.9933346555664025	0.0	50950008
TAU_pos_SET6	Human papillomavirus	Human papillomavirus isolate DyskB	7427		KX781286.1	set:KX781286	7427	k__Viruses	p__Cossaviricota	c__Papovaviricetes	o__Zurhausenvirales	f__Papillomaviridae	g__Unclassified Papillomaviridae	s__Human papillomavirus	t__Human papillomavirus	0.071352	27	883	0.5443651541672276	0.9969726598593515	0.0	50950008
TAU_pos_SET6	Pepper mild mottle virus	Pepper mild mottle virus	6357		NC_003630.1	GCF_000859645.1	6357	k__Viruses	p__Kitrinoviricota	c__Alsuviricetes	o__Martellivirales	f__Virgaviridae	g__Tobamovirus	s__Pepper mild mottle virus	t__Pepper mild mottle virus	0.0710119	23	879	0.4723926380368098	0.9789881954363789	0.0	50950008
TAU_pos_SET6	Porcine circovirus 3	Porcine circovirus 3 strain 29160	2000		NC_031753.1	GCF_001866935.1	2000	k__Viruses	p__Cressdnaviricota	c__Arfiviricetes	o__Cirlivirales	f__Circoviridae	g__Circovirus	s__Circovirus porcine3	t__Circovirus porcine3	0.0686948	7	406	0.503	0.9870899268542136	0.0	50950008
TAU_pos_SET6	Human papillomavirus type 49	Human papillomavirus type 49	7560		NC_001591.1	GCF_000862825.1	7560	k__Viruses	p__Cossaviricota	c__Papovaviricetes	o__Zurhausenvirales	f__Papillomaviridae	g__Betapapillomavirus	s__Betapapillomavirus 3	t__Human papillomavirus type 49	0.0675005	26	765	0.47156084656084657	0.9861261661540508	0.0	50950008
TAU_pos_SET6	Human papillomavirus 120	Human papillomavirus type 120 isolate CL3767	7307		JQ963484.1	set:JQ963484	7307	k__Viruses	p__Cossaviricota	c__Papovaviricetes	o__Zurhausenvirales	f__Papillomaviridae	g__Betapapillomavirus	s__Betapapillomavirus 2	t__Human papillomavirus 120	0.0671516	25	1064	0.4733816887915697	0.9955220888329614	0.0	50950008
TAU_pos_SET6	Human papillomavirus 178	Human papillomavirus type 178	7314		NC_023891.1	GCF_000918095.1	7314	k__Viruses	p__Cossaviricota	c__Papovaviricetes	o__Zurhausenvirales	f__Papillomaviridae	g__Gammapapillomavirus	s__Gammapapillomavirus 24	t__Human papillomavirus 178	0.0670874	25	998	0.5056056877221766	0.9902888280470837	0.0	50950008
TAU_pos_SET6	Torque teno virus	Torque teno virus strain SIA109	3260		FJ426280.1	set:FJ426280	3260	k__Viruses	p__Unclassified Viruses	c__Unclassified Viruses	o__Unclassified Viruses	f__Anelloviridae	g__Unclassified Anelloviridae	s__Torque teno virus	t__Torque teno virus	0.0662264	11	181	0.47607361963190187	0.9857144520727762	0.0	50950008
TAU_pos_SET6	Human papillomavirus 110	Human papillomavirus type 110	7423		EU410348.1	set:EU410348	7423	k__Viruses	p__Cossaviricota	c__Papovaviricetes	o__Zurhausenvirales	f__Papillomaviridae	g__Betapapillomavirus	s__Betapapillomavirus 2	t__Human papillomavirus 110	0.0661023	25	617	0.45305132695675604	0.9884802220680082	0.0	50950008
TAU_pos_SET6	Aedes albopictus densovirus 2	Aedes albopictus densovirus 2 DNA	4176		NC_004285.1	GCF_000847125.1	4176	k__Viruses	p__Cossaviricota	c__Quintoviricetes	o__Piccovirales	f__Parvoviridae	g__Brevihamaparvovirus	s__Brevihamaparvovirus dipteran2	t__Aedes albopictus densovirus 2	0.0657996	14	459	0.5055076628352491	0.9445691131246046	0.0	50950008
TAU_pos_SET6	Human papillomavirus type 196	Human papillomavirus type 196 isolate ACS058	7500		KR816183.1	set:KR816183	7500	k__Viruses	p__Cossaviricota	c__Papovaviricetes	o__Zurhausenvirales	f__Papillomaviridae	g__Betapapillomavirus	s__Betapapillomavirus 1	t__Human papillomavirus type 196	0.0654236	25	768	0.5033333333333333	0.9986754966887418	0.0	50950008
TAU_pos_SET6	Rat parvovirus 1	Rat parvovirus 1a nonstructural protein (NS1) and nonstructural protein (NS2) genes	4936		NC_038545.1	GCF_002827485.1	4936	k__Viruses	p__Cossaviricota	c__Quintoviricetes	o__Piccovirales	f__Parvoviridae	g__Protoparvovirus	s__Protoparvovirus rodent2	t__Rat parvovirus 1	0.063621	16	793	0.48500810372771475	0.9954303894987926	0.0	50950008
TAU_pos_SET6	Porcine torovirus	Porcine torovirus isolate SP-VC29	28262		ON649880.1	acc:ON649880.1	28262	k__Viruses	p__Pisuviricota	c__Pisoniviricetes	o__Nidovirales	f__Tobaniviridae	g__Torovirus	s__Porcine torovirus	t__Porcine torovirus	0.0625022	90	3634	0.45049890312079827	0.9505495207891957	0.0	50950008
TAU_pos_SET6	human papillomavirus 124	Human papillomavirus type 124	7489		GQ845446.1	set:GQ845446	7489	k__Viruses	p__Cossaviricota	c__Papovaviricetes	o__Zurhausenvirales	f__Papillomaviridae	g__Betapapillomavirus	s__Betapapillomavirus 1	t__human papillomavirus 124	0.0602781	23	695	0.4192816130324476	0.9939427774278933	0.0	50950008
TAU_pos_SET6	Tomato black ring virus	Tomato black ring virus RNA 2, complete sequence	4633	RNA2	NC_004440.1	GCF_000853325.1	11991	k__Viruses	p__Pisuviricota	c__Pisoniviricetes	o__Picornavirales	f__Secoviridae	g__Nepovirus	s__Nepovirus nigranuli	t__Nepovirus nigranuli	0.0593091	14	139	0.42003021800129503	0.9856115107913669	0.0	50950008
TAU_pos_SET6	Human rotavirus A	Human rotavirus A RVA/Human-wt/LKA/R1207/2009/G4P[6] VP2 gene for inner capsid protein VP2	2673	2	LC389886.1	set:641b2599c0766078253780cbf49a37033e449625	17421	k__Viruses	p__Duplornaviricota	c__Resentoviricetes	o__Reovirales	f__Sedoreoviridae	g__Rotavirus	s__Rotavirus A	t__G4P[6]	0.0587417	8	132	0.3890759446315002	0.8634588068181818	0.0	50950008
TAU_pos_SET6	Bangali torovirus	Bangali torovirus strain Bangali/H.rufipes/2018 polyprotein 1ab (QKT20_gp1), spike (QKT20_gp2), membrane glycoprotein (QKT20_gp3), hemagglutinin esterase (QKT20_gp4), and N (QKT20_gp5) genes	28850		NC_076940.1	GCF_023156145.1	28850	k__Viruses	p__Pisuviricota	c__Pisoniviricetes	o__Nidovirales	f__Tobaniviridae	g__Torovirus	s__Torovirus banli	t__Bangali torovirus	0.0578268	85	3902	0.42648180242634315	0.9618995608260563	0.0	50950008
TAU_pos_SET6	Human papillomavirus 125	Human papillomavirus type 125 complete genome, strain SIBX9	7809		FN547152.2	set:FN547152	7809	k__Viruses	p__Cossaviricota	c__Papovaviricetes	o__Zurhausenvirales	f__Papillomaviridae	g__Alphapapillomavirus	s__Alphapapillomavirus 2	t__Human papillomavirus 125	0.057808	23	633	0.4118325009604303	0.9074777640005653	0.0	50950008
TAU_pos_SET6	Porcine parvovirus 5	Porcine parvovirus 5 isolate IA469 clone 1	5805		NC_023020.1	GCF_000914195.1	5805	k__Viruses	p__Cossaviricota	c__Quintoviricetes	o__Piccovirales	f__Parvoviridae	g__Protoparvovirus	s__Porcine parvovirus 5	t__Porcine parvovirus 5	0.0574781	17	473	0.38397932816537467	0.9969786279201687	0.0	50950008
TAU_pos_SET6	Canine circovirus	Canine circovirus isolate WM46	2064		KY388485.1	set:KY388485	2064	k__Viruses	p__Cressdnaviricota	c__Arfiviricetes	o__Cirlivirales	f__Circoviridae	g__Circovirus	s__Circovirus canine	t__Circovirus canine	0.0570555	6	144	0.4064922480620155	0.9654625739184564	0.0	50950008
TAU_pos_SET6	Jiangsu mamastrovirus 2	MAG: Jiangsu mamastrovirus 2 isolate 67-73244	6620		MW784073.1	acc:MW784073.1	6620	k__Viruses	p__Pisuviricota	c__Stelpaviricetes	o__Stellavirales	f__Astroviridae	g__Mamastrovirus	s__Jiangsu mamastrovirus 2	t__Jiangsu mamastrovirus 2	0.0563315	19	319	0.4149546827794562	0.943514392149213	0.0	50950008
TAU_pos_SET6	Human polyomavirus 6	Human polyomavirus 6	4926		NC_014406.1	GCF_000888495.1	4926	k__Viruses	p__Cossaviricota	c__Papovaviricetes	o__Sepolyvirales	f__Polyomaviridae	g__Deltapolyomavirus	s__Deltapolyomavirus sextihominis	t__Human polyomavirus 6	0.0557814	14	571	0.38408444985789686	0.9981078524124882	0.0	50950008
TAU_pos_SET6	Culex pipiens densovirus	Culex pipiens densovirus	5759		NC_012685.1	GCF_000883835.1	5759	k__Viruses	p__Cossaviricota	c__Quintoviricetes	o__Piccovirales	f__Parvoviridae	g__Protoambidensovirus	s__Protoambidensovirus dipteran1	t__Culex pipiens densovirus	0.0545291	16	1010	0.4103142906754645	0.9688577527228943	0.0	50950008
TAU_pos_SET6	Torque teno sus virus 1b	Torque teno sus virus 1b isolate TTSuV 1b pork 203	2887		MT671969.1	acc:MT671969.1	2887	k__Viruses	p__Unclassified Viruses	c__Unclassified Viruses	o__Unclassified Viruses	f__Anelloviridae	g__Iotatorquevirus	s__Torque teno sus virus 1b	t__Torque teno sus virus 1b	0.0543875	8	318	0.41842743332178733	0.9834437086092714	0.0	50950008
TAU_pos_SET6	Human papillomavirus type 60	Human papillomavirus type 60	7313		NC_001693.1	GCF_000838505.1	7313	k__Viruses	p__Cossaviricota	c__Papovaviricetes	o__Zurhausenvirales	f__Papillomaviridae	g__Gammapapillomavirus	s__Gammapapillomavirus 4	t__Human papillomavirus type 60	0.0536772	20	732	0.39573362505127857	0.9806939353652325	0.0	50950008
TAU_pos_SET6	Aleutian mink disease parvovirus	Aleutian mink disease virus	4801		NC_001662.1	GCF_000838725.1	4801	k__Viruses	p__Cossaviricota	c__Quintoviricetes	o__Piccovirales	f__Parvoviridae	g__Amdoparvovirus	s__Amdoparvovirus carnivoran1	t__Aleutian mink disease virus	0.0531456	13	425	0.40408248281608	0.9779942897084434	0.0	50950008
TAU_pos_SET6	Avian leukosis virus ev/J	Avian leukosis virus subgroup J isolate PDRC-59831	7581		KP284572.1	set:KP284572	7581	k__Viruses	p__Artverviricota	c__Revtraviricetes	o__Ortervirales	f__Retroviridae	g__Alpharetrovirus	s__Avian leukosis virus	t__Avian leukosis virus ev/J	0.0517797	20	326	0.38134810710988	0.946937329095376	0.0	50950008
TAU_pos_SET6	Human mastadenovirus C	Human mastadenovirus C isolate 245-Araguaina	36100		MN628614.1	acc:MN628614.1	36100	k__Viruses	p__Preplasmiviricota	c__Tectiliviricetes	o__Rowavirales	f__Adenoviridae	g__Mastadenovirus	s__Human mastadenovirus C	t__Human mastadenovirus C	0.0516502	95	1990	0.35518005540166203	0.9926040966214741	0.0	50950008
TAU_pos_SET6	Pepper vein yellows virus 5	Pepper vein yellows virus 5 isolate Spain-Almeria 2-2013	6125	NA	NC_036803.1	GCF_002922445.1	6125	k__Viruses	p__Pisuviricota	c__Pisoniviricetes	o__Sobelivirales	f__Solemoviridae	g__Polerovirus	s__Pepper vein yellows virus 5	t__Pepper vein yellows virus 5	0.0512707	16	193	0.3340408163265306	0.9966814159292035	0.0	50950008
TAU_pos_SET6	Sichuan mamastrovirus 11	MAG: Sichuan mamastrovirus 11 isolate R69-151373	6576		MW784105.1	acc:MW784105.1	6576	k__Viruses	p__Pisuviricota	c__Stelpaviricetes	o__Stellavirales	f__Astroviridae	g__Mamastrovirus	s__Sichuan mamastrovirus 11	t__Sichuan mamastrovirus 11	0.0477545	16	387	0.36237834549878345	0.94072255063188	0.0	50950008
TAU_pos_SET6	Aphid lethal paralysis virus	Aphid lethal paralysis virus isolate AP	9940		KJ817182.1	set:KJ817182	9940	k__Viruses	p__Pisuviricota	c__Pisoniviricetes	o__Picornavirales	f__Dicistroviridae	g__Cripavirus	s__Cripavirus mortiferum	t__Aphid lethal paralysis virus	0.0473893	24	1147	0.3522132796780684	0.965647790624019	0.0	50950008
TAU_pos_SET6	Human rotavirus A	Human rotavirus A RVA/Human-wt/VNM/RVN18.0197/2018/G9P[8] VP2 gene for VP2 protein	2621	2	LC491466.1	set:1137bb10e3ca3c91fa3ba986b7c0baae2d6d8a41	17806	k__Viruses	p__Duplornaviricota	c__Resentoviricetes	o__Reovirales	f__Sedoreoviridae	g__Rotavirus	s__Rotavirus A	t__G9P[8]	0.0449304	6	144	0.31819916062571535	0.8969404186795492	0.0	50950008
TAU_pos_SET6	Human papillomavirus type 8	Human papillomavirus type 8	7654		M12737.1	set:M12737	7654	k__Viruses	p__Cossaviricota	c__Papovaviricetes	o__Zurhausenvirales	f__Papillomaviridae	g__Betapapillomavirus	s__Betapapillomavirus 1	t__Human papillomavirus type 8	0.0435929	17	800	0.32923961327410506	0.9701535760795865	0.0	50950008
TAU_pos_SET6	Betapapillomavirus 2	Betapapillomavirus 2 isolate Beta02_m292c14	7323		MF588682.1	set:MF588682	7323	k__Viruses	p__Cossaviricota	c__Papovaviricetes	o__Zurhausenvirales	f__Papillomaviridae	g__Betapapillomavirus	s__Betapapillomavirus 2	t__Betapapillomavirus 2	0.0428832	16	345	0.3288269834767172	0.9929383637243341	0.0	50950008
TAU_pos_SET6	Human papillomavirus 149	Human papillomavirus type 149	7333		GU117629.1	set:GU117629	7333	k__Viruses	p__Cossaviricota	c__Papovaviricetes	o__Zurhausenvirales	f__Papillomaviridae	g__Gammapapillomavirus	s__Gammapapillomavirus 7	t__Human papillomavirus 149	0.0428247	16	178	0.3294695213418792	0.9834437086092717	0.0	50950008
TAU_pos_SET6	Cucumber green mottle mosaic virus	Cucumber green mottle mosaic virus	6424		NC_001801.1	GCF_000849225.1	6424	k__Viruses	p__Kitrinoviricota	c__Alsuviricetes	o__Martellivirales	f__Virgaviridae	g__Tobamovirus	s__Cucumber green mottle mosaic virus	t__Cucumber green mottle mosaic virus	0.0427738	14	847	0.30323785803237857	0.9862567021704967	0.0	50950008
TAU_pos_SET6	Human papillomavirus 122	Human papillomavirus type 122	7397		GQ845444.1	set:GQ845444	7397	k__Viruses	p__Cossaviricota	c__Papovaviricetes	o__Zurhausenvirales	f__Papillomaviridae	g__Betapapillomavirus	s__Betapapillomavirus 2	t__Human papillomavirus 122	0.0424541	16	598	0.3062052183317561	0.9988938053097345	0.0	50950008
TAU_pos_SET6	Rondani's wasp virus 1	Rondani's wasp virus 1 isolate Hz1	9332		MT783302.1	acc:MT783302.1	9332	k__Viruses	p__Pisuviricota	c__Pisoniviricetes	o__Picornavirales	f__Dicistroviridae	g__Cripavirus	s__Rondani's wasp virus 1	t__Rondani's wasp virus 1	0.042064	20	440	0.30979425632233176	0.9189590893913053	0.0	50950008
TAU_pos_SET6	Human papillomavirus 98	Human papillomavirus type 98	7466		FM955837.2	set:FM955837	7466	k__Viruses	p__Cossaviricota	c__Papovaviricetes	o__Zurhausenvirales	f__Papillomaviridae	g__Betapapillomavirus	s__Betapapillomavirus 1	t__Human papillomavirus 98	0.0420618	16	360	0.3029734797749799	0.9966887417218544	0.0	50950008
TAU_pos_SET6	Porcine bocavirus	Porcine bocavirus strain 644-3DI-HR	4996		KF206162.1	set:KF206162	4996	k__Viruses	p__Cossaviricota	c__Quintoviricetes	o__Piccovirales	f__Parvoviridae	g__Bocaparvovirus	s__Porcine bocavirus	t__Porcine bocavirus	0.0392856	10	109	0.21717373899119297	0.9103120978120979	0.0	50950008
TAU_pos_SET6	Breda virus	Breda virus	28475		NC_007447.1	GCF_000865145.1	28475	k__Viruses	p__Pisuviricota	c__Pisoniviricetes	o__Nidovirales	f__Tobaniviridae	g__Torovirus	s__Bovine torovirus	t__Breda virus	0.0385994	56	1233	0.2707638279192274	0.9398403270360989	0.0	50950008
TAU_pos_SET6	Bovine parvovirus 3	Bovine parvovirus 3 isolate ujs1794 nonstructural protein and structural protein genes	5100		NC_037053.1	GCF_002937235.1	5100	k__Viruses	p__Cossaviricota	c__Quintoviricetes	o__Piccovirales	f__Parvoviridae	g__Erythroparvovirus	s__Erythroparvovirus ungulate1	t__Bovine parvovirus 3	0.0384845	10	410	0.296078431372549	0.9688741721854306	0.0	50950008
TAU_pos_SET6	Mupapillomavirus 1	Human papillomavirus - 1	7815		NC_001356.1	GCF_000866405.1	7815	k__Viruses	p__Cossaviricota	c__Papovaviricetes	o__Zurhausenvirales	f__Papillomaviridae	g__Mupapillomavirus	s__Mupapillomavirus 1	t__Mupapillomavirus 1	0.0376719	15	1165	0.2830454254638516	0.9964650478292864	0.0	50950008
TAU_pos_SET6	Human papillomavirus type 53	Human papillomavirus type 53	7856		NC_001593.1	GCF_000865685.1	7856	k__Viruses	p__Cossaviricota	c__Papovaviricetes	o__Zurhausenvirales	f__Papillomaviridae	g__Alphapapillomavirus	s__Alphapapillomavirus 6	t__Human papillomavirus type 53	0.0374753	15	505	0.28475050916496947	0.9889035177314313	0.0	50950008
TAU_pos_SET6	Tomato black ring virus	Tomato black ring virus RNA 1, complete sequence	7358	RNA1	NC_004439.1	GCF_000853325.1	11991	k__Viruses	p__Pisuviricota	c__Pisoniviricetes	o__Picornavirales	f__Secoviridae	g__Nepovirus	s__Nepovirus nigranuli	t__Nepovirus nigranuli	0.0373443	14	452	0.27099755368306605	0.9684358473486112	0.0	50950008
TAU_pos_SET6	Potato leafroll virus	Potato leaf roll virus (Canadian isolate) genomic RNA, complete sequence	5883	NA	NC_076505.1	GCF_021461725.1	5883	k__Viruses	p__Pisuviricota	c__Pisoniviricetes	o__Sobelivirales	f__Solemoviridae	g__Polerovirus	s__Potato leafroll virus	t__Potato leafroll virus	0.0366986	11	116	0.21468638449770525	0.9825809583246653	0.0	50950008
TAU_pos_SET6	Grapevine fanleaf virus	Grapevine fanleaf virus isolate SGM2 clone 1 segment RNA2, complete sequence	3779	RNA2	KX034945.1	set:7aed2fb91c999a7497d8d198ebbc0d05d6e628a6	11122	k__Viruses	p__Pisuviricota	c__Pisoniviricetes	o__Picornavirales	f__Secoviridae	g__Nepovirus	s__Nepovirus foliumflabelli	t__Nepovirus foliumflabelli	0.0363561	7	273	0.23418893887271766	0.9449856597691342	0.0	50950008
TAU_pos_SET6	Rattus norvegicus papillomavirus 2	Rattus norvegicus papillomavirus 2	7724		HQ625441.1	set:HQ625441	7724	k__Viruses	p__Cossaviricota	c__Papovaviricetes	o__Zurhausenvirales	f__Papillomaviridae	g__Iotapapillomavirus	s__Iotapapillomavirus 1	t__Rattus norvegicus papillomavirus 2	0.0355747	14	306	0.2278612118073537	0.9854754408548786	0.0	50950008
TAU_pos_SET6	Human papillomavirus 94	Human papillomavirus type 94 complete genome	7881		AJ620211.1	set:AJ620211	7881	k__Viruses	p__Cossaviricota	c__Papovaviricetes	o__Zurhausenvirales	f__Papillomaviridae	g__Alphapapillomavirus	s__Alphapapillomavirus 2	t__Human papillomavirus 94	0.034866	14	193	0.2645603349828702	0.9748008158614868	0.0	50950008
TAU_pos_SET6	Human mastadenovirus F	Human mastadenovirus F isolate Hannover_2022_10	34237		ON815883.1	acc:ON815883.1	34237	k__Viruses	p__Preplasmiviricota	c__Tectiliviricetes	o__Rowavirales	f__Adenoviridae	g__Mastadenovirus	s__Human mastadenovirus F	t__Human mastadenovirus F	0.0332497	58	1376	0.24271986447410696	0.999885818680064	0.0	50950008
TAU_pos_SET6	Human papillomavirus type 88	Human papillomavirus type 88	7326		NC_010329.1	GCF_000874925.1	7326	k__Viruses	p__Cossaviricota	c__Papovaviricetes	o__Zurhausenvirales	f__Papillomaviridae	g__Gammapapillomavirus	s__Gammapapillomavirus 5	t__Human papillomavirus type 88	0.0321492	12	691	0.24433524433524434	0.9882371491643016	0.0	50950008
TAU_pos_SET6	Human astrovirus 1	Human astrovirus 1 HAstV1/181937/Tokyo/2018 RNA, nearly complete genome	6861		LC694990.1	acc:LC694990.1	6861	k__Viruses	p__Pisuviricota	c__Stelpaviricetes	o__Stellavirales	f__Astroviridae	g__Mamastrovirus	s__Mamastrovirus 1	t__Human astrovirus 1	0.0314674	11	445	0.22839236262935433	0.9929165663898175	0.0	50950008
TAU_pos_SET6	Human papillomavirus 105	Human papillomavirus type 105	7667		FM955841.1	set:FM955841	7667	k__Viruses	p__Cossaviricota	c__Papovaviricetes	o__Zurhausenvirales	f__Papillomaviridae	g__Betapapillomavirus	s__Betapapillomavirus 1	t__Human papillomavirus 105	0.0307193	12	522	0.23007695317594887	0.9994481236203091	0.0	50950008
TAU_pos_SET6	Human adenovirus 12	Human adenovirus 12 isolate HAdV-A12/USA/8B8/2011	34137		PP068617.1	acc:PP068617.1	34137	k__Viruses	p__Preplasmiviricota	c__Tectiliviricetes	o__Rowavirales	f__Adenoviridae	g__Mastadenovirus	s__Human mastadenovirus A	t__Human adenovirus 12	0.0298974	52	1443	0.21554325218970619	0.9911872953213867	0.0	50950008
TAU_pos_SET6	TTV-like mini virus	MAG: TTV-like mini virus isolate SAfiA-35-59	2820		MN769256.1	acc:MN769256.1	2820	k__Viruses	p__Unclassified Viruses	c__Unclassified Viruses	o__Unclassified Viruses	f__Anelloviridae	g__Betatorquevirus	s__TTV-like mini virus	t__TTV-like mini virus	0.0278398	4	170	0.21418439716312057	0.9801324503311258	0.0	50950008
TAU_pos_SET6	Aphis gossypii virus	Aphis gossypii virus isolate RZ	10243		MH476200.1	set:MH476200	10243	k__Viruses	p__Pisuviricota	c__Pisoniviricetes	o__Picornavirales	f__Dicistroviridae	g__Cripavirus	s__Aphis gossypii virus	t__Aphis gossypii virus	0.026826	14	486	0.19896514692961045	0.9436746324730064	0.0	50950008
TAU_pos_SET6	Big Sioux River virus	Big Sioux River virus strain Kenya P9 non-structural polyprotein and structural protein precursor, genes	9691		NC_035184.1	GCF_002219505.1	9691	k__Viruses	p__Pisuviricota	c__Pisoniviricetes	o__Picornavirales	f__Dicistroviridae	g__Unclassified Dicistroviridae	s__Big Sioux River virus	t__Big Sioux River virus	0.0243035	12	146	0.17727788669899908	0.9656311154598823	0.0	50950008
TAU_pos_SET6	Protoparvovirus Zsana/2013/HUN	Protoparvovirus Zsana/2013/HUN non-structural protein gene; putative middle protein gene; and structural protein-like gene, partial sequence	4281		NC_043446.1	GCF_003033325.1	4281	k__Viruses	p__Cossaviricota	c__Quintoviricetes	o__Piccovirales	f__Parvoviridae	g__Protoparvovirus	s__Protoparvovirus ungulate2	t__Protoparvovirus Zsana/2013/HUN	0.0229235	5	127	0.1417893015650549	0.9585452303898906	0.0	50950008
TAU_pos_SET6	Porcine picobirnavirus	Porcine picobirnavirus strain 221/04-16/ITA/2004 segment S, complete sequence	1730	S	NC_029802.1	GCF_001611625.1	4396	k__Viruses	p__Pisuviricota	c__Duplopiviricetes	o__Durnavirales	f__Picobirnaviridae	g__Picobirnavirus	s__Porcine picobirnavirus	t__Porcine picobirnavirus	0.0226903	2	222	0.17341040462427745	0.8999999999999999	0.0	50950008
TAU_pos_SET6	Torque teno virus	MAG: Torque teno virus isolate SAfiA-822-3	3558		MN765197.1	acc:MN765197.1	3558	k__Viruses	p__Unclassified Viruses	c__Unclassified Viruses	o__Unclassified Viruses	f__Anelloviridae	g__Unclassified Anelloviridae	s__Torque teno virus	t__Torque teno virus	0.0220653	4	201	0.16863406408094436	0.9633058521421813	0.0	50950008
TAU_pos_SET6	Human papillomavirus	MAG: Human papillomavirus isolate HPV-mSK_135	7214		MH777277.2	set:MH777277	7214	k__Viruses	p__Cossaviricota	c__Papovaviricetes	o__Zurhausenvirales	f__Papillomaviridae	g__Unclassified Papillomaviridae	s__Human papillomavirus	t__Human papillomavirus	0.0217655	8	398	0.16163016357083448	0.9991319444444444	0.0	50950008
TAU_pos_SET6	Porcine astrovirus 2	Porcine astrovirus 2 isolate KNU14-07	6338		KP759770.1	set:KP759770	6338	k__Viruses	p__Pisuviricota	c__Stelpaviricetes	o__Stellavirales	f__Astroviridae	g__Mamastrovirus	s__Porcine astrovirus 2	t__Porcine astrovirus 2	0.0216771	7	450	0.16582518144525088	0.904961871321265	0.0	50950008
TAU_pos_SET6	Grapevine fanleaf virus	Grapevine fanleaf virus isolate SGM2 clone 1 segment RNA1, complete sequence	7343	RNA1	KX034891.1	set:7aed2fb91c999a7497d8d198ebbc0d05d6e628a6	11122	k__Viruses	p__Pisuviricota	c__Pisoniviricetes	o__Picornavirales	f__Secoviridae	g__Nepovirus	s__Nepovirus foliumflabelli	t__Nepovirus foliumflabelli	0.0213832	8	298	0.16219528802941577	0.9294083845095691	0.0	50950008
TAU_pos_SET6	Felis catus papillomavirus 3	Felis catus papillomavirus-3	7583		NC_021472.1	GCF_000910155.1	7583	k__Viruses	p__Cossaviricota	c__Papovaviricetes	o__Zurhausenvirales	f__Papillomaviridae	g__Taupapillomavirus	s__Taupapillomavirus 3	t__Felis catus papillomavirus 3	0.0207064	8	593	0.15561123565871027	1.0	0.0	50950008
TAU_pos_SET6	Carrot red leaf virus	Carrot red leaf virus	5723	NA	NC_006265.1	GCF_000854305.1	5723	k__Viruses	p__Pisuviricota	c__Pisoniviricetes	o__Sobelivirales	f__Solemoviridae	g__Polerovirus	s__Carrot red leaf virus	t__Carrot red leaf virus	0.0205771	6	206	0.15411497466363797	0.9556569258556015	0.0	50950008
TAU_pos_SET6	Human papillomavirus	MAG: Human papillomavirus isolate HPV-mSK_059	7214		MH777204.2	set:MH777204	7214	k__Viruses	p__Cossaviricota	c__Papovaviricetes	o__Zurhausenvirales	f__Papillomaviridae	g__Unclassified Papillomaviridae	s__Human papillomavirus	t__Human papillomavirus	0.0190449	7	148	0.14028278347657333	0.9930564204757752	0.0	50950008
TAU_pos_SET6	Sewage-associated gemycircularvirus 6	Sewage-associated gemycircularvirus 6	2147		NC_026162.1	GCF_000930835.1	2147	k__Viruses	p__Cressdnaviricota	c__Repensiviricetes	o__Geplafuvirales	f__Genomoviridae	g__Gemycircularvirus	s__Gemycircularvirus sewopo3	t__Sewage-associated gemycircularvirus 6	0.0182833	2	185	0.1406613879832324	0.9966887417218543	0.0	50950008
TAU_pos_SET6	Centovirus AC	Centovirus AC	9070		NC_031687.1	GCF_001866225.1	9070	k__Viruses	p__Pisuviricota	c__Pisoniviricetes	o__Picornavirales	f__Dicistroviridae	g__Unclassified Dicistroviridae	s__Centovirus	t__Centovirus AC	0.0173116	8	271	0.11863285556780595	0.9365669547648443	0.0	50950008
TAU_pos_SET6	Human papillomavirus KC5	Human papillomavirus KC5	7143		NC_026946.1	GCF_000989155.1	7143	k__Viruses	p__Cossaviricota	c__Papovaviricetes	o__Zurhausenvirales	f__Papillomaviridae	g__Gammapapillomavirus	s__Human papillomavirus KC5	t__Human papillomavirus KC5	0.0164864	6	715	0.12683746325073497	0.9966887417218544	0.0	50950008
TAU_pos_SET6	Human papillomavirus	MAG: Human papillomavirus isolate HPV-mSK_136	7193		MH777278.1	set:MH777278	7193	k__Viruses	p__Cossaviricota	c__Papovaviricetes	o__Zurhausenvirales	f__Papillomaviridae	g__Unclassified Papillomaviridae	s__Human papillomavirus	t__Human papillomavirus	0.0163718	6	399	0.12595579035173085	1.0	0.0	50950008
TAU_pos_SET6	Human papillomavirus 175	Human papillomavirus type 175 isolate SE87	7226		NC_038524.1	GCF_002827025.1	7226	k__Viruses	p__Cossaviricota	c__Papovaviricetes	o__Zurhausenvirales	f__Papillomaviridae	g__Gammapapillomavirus	s__Gammapapillomavirus 23	t__Human papillomavirus 175	0.0162971	6	202	0.1253805701632992	1.0	0.0	50950008
TAU_pos_SET6	Human papillomavirus	MAG: Human papillomavirus isolate HPV-mSK_158	7320		MH777300.2	set:MH777300	7320	k__Viruses	p__Cossaviricota	c__Papovaviricetes	o__Zurhausenvirales	f__Papillomaviridae	g__Unclassified Papillomaviridae	s__Human papillomavirus	t__Human papillomavirus	0.0160878	6	522	0.12377049180327869	0.9768211920529802	0.0	50950008
TAU_pos_SET6	Human papillomavirus	MAG: Human papillomavirus isolate HPV-mSK_188	7326		MH777330.1	set:MH777330	7326	k__Viruses	p__Cossaviricota	c__Papovaviricetes	o__Zurhausenvirales	f__Papillomaviridae	g__Unclassified Papillomaviridae	s__Human papillomavirus	t__Human papillomavirus	0.0160746	6	285	0.1036036036036036	0.9914393978898334	0.0	50950008
TAU_pos_SET6	human papillomavirus 24	Human papillomavirus type 24	7452		U31782.1	set:U31782	7452	k__Viruses	p__Cossaviricota	c__Papovaviricetes	o__Zurhausenvirales	f__Papillomaviridae	g__Betapapillomavirus	s__Betapapillomavirus 1	t__human papillomavirus 24	0.0158028	6	219	0.12144390767579173	0.9734657836644592	0.0	50950008
TAU_pos_SET6	Porcine parvovirus	Porcine parvovirus	5075		NC_001718.1	GCF_000839485.1	5075	k__Viruses	p__Cossaviricota	c__Quintoviricetes	o__Piccovirales	f__Parvoviridae	g__Protoparvovirus	s__Protoparvovirus ungulate1	t__Porcine parvovirus	0.0154696	4	182	0.11901477832512315	1.0	0.0	50950008
TAU_pos_SET6	Feline astrovirus 3	Feline astrovirus 3 strain FAstV3-AUS	6458		MW037839.1	acc:MW037839.1	6458	k__Viruses	p__Pisuviricota	c__Stelpaviricetes	o__Stellavirales	f__Astroviridae	g__Mamastrovirus	s__Feline astrovirus 3	t__Feline astrovirus 3	0.0151959	5	151	0.11690925983276557	0.9602649006622517	0.0	50950008
TAU_pos_SET6	human papillomavirus 62	Human papillomavirus 62 isolate V521R491_HPV62	8092		OP712013.1	acc:OP712013.1	8092	k__Viruses	p__Cossaviricota	c__Papovaviricetes	o__Zurhausenvirales	f__Papillomaviridae	g__Alphapapillomavirus	s__Alphapapillomavirus 3	t__human papillomavirus 62	0.014553	6	197	0.11183885318833416	0.983428991905813	0.0	50950008
TAU_pos_SET6	Torque teno sus virus 1b	Torque teno sus virus 2 isolate TTV2Bj7-3	2808		HM633219.1	set:HM633219	2808	k__Viruses	p__Unclassified Viruses	c__Unclassified Viruses	o__Unclassified Viruses	f__Anelloviridae	g__Iotatorquevirus	s__Torque teno sus virus 1b	t__Torque teno sus virus 1b	0.0139794	2	137	0.09757834757834757	0.9854014598540146	0.0	50950008
TAU_pos_SET6	Porcine stool-associated circular virus 5	Porcine stool-associated circular virus 5 isolate CP3	3062		NC_023878.1	GCF_000919675.1	3062	k__Viruses	p__Cressdnaviricota	c__Arfiviricetes	o__Cirlivirales	f__Circoviridae	g__Unclassified Circoviridae	s__Porcine stool-associated circular virus 5	t__Porcine stool-associated circular virus 5	0.0128198	2	148	0.09666884389288047	0.918918918918919	0.0	50950008
TAU_pos_SET6	Tomato mosaic virus	Tomato mosaic virus	6383		NC_002692.1	GCF_000853705.1	6383	k__Viruses	p__Kitrinoviricota	c__Alsuviricetes	o__Martellivirales	f__Virgaviridae	g__Tobamovirus	s__Tomato mosaic virus	t__Tomato mosaic virus	0.0122996	4	320	0.09337302208992637	0.9915413349483022	0.0	50950008
TAU_pos_SET6	Acute bee paralysis virus	Acute bee paralysis virus isolate ABPV_No15_Mi020-JL2018-10	9586		MZ821785.1	acc:MZ821785.1	9586	k__Viruses	p__Pisuviricota	c__Pisoniviricetes	o__Picornavirales	f__Dicistroviridae	g__Aparavirus	s__Aparavirus apisacutum	t__Acute bee paralysis virus	0.0122848	6	200	0.09315668683496767	0.9663675336724574	0.0	50950008
TAU_pos_SET6	Tobacco mosaic virus	Tobacco mosaic virus	6395		NC_001367.1	GCF_000854365.1	6395	k__Viruses	p__Kitrinoviricota	c__Alsuviricetes	o__Martellivirales	f__Virgaviridae	g__Tobamovirus	s__Tobacco mosaic virus	t__Tobacco mosaic virus	0.0122765	4	175	0.0944487881157154	0.9139072847682119	0.0	50950008
TAU_pos_SET6	Chum salmon reovirus CS	Chum salmon reovirus CS segment 4	1619	4	NC_007585.1	GCF_000866805.1	23015	k__Viruses	p__Duplornaviricota	c__Resentoviricetes	o__Reovirales	f__Spinareoviridae	g__Aquareovirus	s__Aquareovirus salmonis		0.012123	1	104	0.06423718344657196	0.9523809523809523	0.0	50950008
TAU_pos_SET6	Torque teno virus 13	Torque teno virus 13 isolate TCHN-A Orf2 and Orf1 genes	3312		NC_038339.1	GCF_002818305.1	3312	k__Viruses	p__Unclassified Viruses	c__Unclassified Viruses	o__Unclassified Viruses	f__Anelloviridae	g__Alphatorquevirus	s__Alphatorquevirus homin13	t__Torque teno virus 13	0.0118521	2	151	0.09118357487922706	0.9139072847682119	0.0	50950008
TAU_pos_SET6	Y73 sarcoma virus	Y73 sarcoma virus	5188		NC_008094.1	GCF_000868085.1	5188	k__Viruses	p__Artverviricota	c__Revtraviricetes	o__Ortervirales	f__Retroviridae	g__Alpharetrovirus	s__Y73 sarcoma virus	t__Y73 sarcoma virus	0.0113495	3	138	0.07979953739398613	1.0	0.0	50950008
TAU_pos_SET6	Human picobirnavirus	Human picobirnavirus RNA segment 2, complete sequence	1745	2	NC_007027.1	GCF_000859285.1	4270	k__Viruses	p__Pisuviricota	c__Duplopiviricetes	o__Durnavirales	f__Picobirnaviridae	g__Orthopicobirnavirus	s__Orthopicobirnavirus hominis	t__Orthopicobirnavirus hominis	0.0112476	1	149	0.08538681948424069	0.959731543624161	0.0	50950008
TAU_pos_SET6	Human papillomavirus 157	Human papillomavirus 157	7154		KT698166.1	set:KT698166	7154	k__Viruses	p__Cossaviricota	c__Papovaviricetes	o__Zurhausenvirales	f__Papillomaviridae	g__Gammapapillomavirus	s__Gammapapillomavirus 12	t__Human papillomavirus 157	0.010974	4	159	0.08442829186469109	0.9933774834437086	0.0	50950008
TAU_pos_SET6	Human papillomavirus 199	Human papillomavirus 199 isolate A484-SLO	7184		KT372348.1	set:KT372348	7184	k__Viruses	p__Cossaviricota	c__Papovaviricetes	o__Zurhausenvirales	f__Papillomaviridae	g__Gammapapillomavirus	s__Gammapapillomavirus 12	t__Human papillomavirus 199	0.0109282	4	219	0.08407572383073497	1.0	0.0	50950008
TAU_pos_SET6	Human papillomavirus	MAG: Human papillomavirus isolate HPV-mSK_239	7240		MH777378.1	set:MH777378	7240	k__Viruses	p__Cossaviricota	c__Papovaviricetes	o__Zurhausenvirales	f__Papillomaviridae	g__Unclassified Papillomaviridae	s__Human papillomavirus	t__Human papillomavirus	0.0108437	4	167	0.08342541436464089	0.9966887417218543	0.0	50950008
TAU_pos_SET6	Human papillomavirus	MAG: Human papillomavirus isolate HPV-mSK_133	7245		MH777275.1	set:MH777275	7245	k__Viruses	p__Cossaviricota	c__Papovaviricetes	o__Zurhausenvirales	f__Papillomaviridae	g__Unclassified Papillomaviridae	s__Human papillomavirus	t__Human papillomavirus	0.0108362	4	365	0.08322981366459627	0.9718322295805739	0.0	50950008
TAU_pos_SET6	Gammapapillomavirus sp.	Gammapapillomavirus sp. isolate Gamma_w27c157c	7255		NC_040804.1	GCF_004131585.1	7255	k__Viruses	p__Cossaviricota	c__Papovaviricetes	o__Zurhausenvirales	f__Papillomaviridae	g__Gammapapillomavirus	s__Gammapapillomavirus sp.	t__Gammapapillomavirus sp.	0.0108213	4	133	0.07332873880082702	0.9924812030075187	0.0	50950008
TAU_pos_SET6	Human papillomavirus	MAG: Human papillomavirus isolate HPV-mSK_036	7256		MH777184.1	set:MH777184	7256	k__Viruses	p__Cossaviricota	c__Papovaviricetes	o__Zurhausenvirales	f__Papillomaviridae	g__Unclassified Papillomaviridae	s__Human papillomavirus	t__Human papillomavirus	0.0108198	4	333	0.07938257993384785	0.9966887417218544	0.0	50950008
TAU_pos_SET6	Gammapapillomavirus 19	Gammapapillomavirus 19 isolate Gamma19_w18c11d	7282		MF588733.1	set:MF588733	7282	k__Viruses	p__Cossaviricota	c__Papovaviricetes	o__Zurhausenvirales	f__Papillomaviridae	g__Gammapapillomavirus	s__Gammapapillomavirus 19	t__Gammapapillomavirus 19	0.0107811	4	204	0.07964844822850865	1.0	0.0	50950008
TAU_pos_SET6	Betapapillomavirus 2	Betapapillomavirus 2 isolate Beta02_m292c88	7449		MF588683.1	set:MF588683	7449	k__Viruses	p__Cossaviricota	c__Papovaviricetes	o__Zurhausenvirales	f__Papillomaviridae	g__Betapapillomavirus	s__Betapapillomavirus 2	t__Betapapillomavirus 2	0.0105394	4	212	0.08108470935696066	0.990066225165563	0.0	50950008
TAU_pos_SET6	Human papillomavirus type 90	Human papillomavirus type 90	8033		NC_004104.1	GCF_000862685.1	8033	k__Viruses	p__Cossaviricota	c__Papovaviricetes	o__Zurhausenvirales	f__Papillomaviridae	g__Alphapapillomavirus	s__Alphapapillomavirus 14	t__Human papillomavirus type 90	0.00977323	4	151	0.07518984190215362	0.9933774834437086	0.0	50950008
TAU_pos_SET6	RD114 retrovirus	RD114 retrovirus	8406		NC_009889.1	GCF_000873665.1	8406	k__Viruses	p__Artverviricota	c__Revtraviricetes	o__Ortervirales	f__Retroviridae	g__Gammaretrovirus	s__RD114 retrovirus	t__RD114 retrovirus	0.00933956	4	113	0.052105638829407566	0.9178065054211844	0.0	50950008
TAU_pos_SET6	Porcine parvovirus 7	Porcine parvovirus 7 strain AH-PPV720178-2	4331		MW853959.1	acc:MW853959.1	4331	k__Viruses	p__Cossaviricota	c__Quintoviricetes	o__Piccovirales	f__Parvoviridae	g__Chaphamaparvovirus	s__Chaphamaparvovirus ungulate1	t__Porcine parvovirus 7	0.00906353	2	134	0.0618794735626876	0.9925373134328358	0.0	50950008
TAU_pos_SET6	Human adenovirus 31	Human adenovirus 31 isolate HAdV-A31/USA/16G2/2018	33806		OR777233.1	acc:OR777233.1	33806	k__Viruses	p__Preplasmiviricota	c__Tectiliviricetes	o__Rowavirales	f__Adenoviridae	g__Mastadenovirus	s__Human mastadenovirus A	t__Human adenovirus 31	0.00812812	14	377	0.06250369756847897	1.0	0.0	50950008
TAU_pos_SET6	Gammapapillomavirus sp.	Gammapapillomavirus sp. isolate Gamma_LCOSOc196	7257		NC_040619.1	GCF_004131525.1	7257	k__Viruses	p__Cossaviricota	c__Papovaviricetes	o__Zurhausenvirales	f__Papillomaviridae	g__Gammapapillomavirus	s__Gammapapillomavirus sp.	t__Gammapapillomavirus sp.	0.00811372	3	359	0.06118230673832162	0.9481080744955382	0.0	50950008
TAU_pos_SET6	Human papillomavirus type 194	Human papillomavirus type 194 isolate ACS290	7260		KR816181.1	set:KR816181	7260	k__Viruses	p__Cossaviricota	c__Papovaviricetes	o__Zurhausenvirales	f__Papillomaviridae	g__Gammapapillomavirus	s__Human papillomavirus type 194	t__Human papillomavirus type 194	0.00811036	3	282	0.0568870523415978	0.9337748344370861	0.0	50950008
TAU_pos_SET6	Porcine bocavirus	Porcine bocavirus strain 20ZS-RS	5053		KF206154.1	set:KF206154	5053	k__Viruses	p__Cossaviricota	c__Quintoviricetes	o__Piccovirales	f__Parvoviridae	g__Bocaparvovirus	s__Porcine bocavirus	t__Porcine bocavirus	0.00776849	2	124	0.04868395012863645	0.9186991869918699	0.0	50950008
TAU_pos_SET6	Human alphaherpesvirus 1	Human herpesvirus 1 strain 17	152222		NC_001806.2	GCF_000859985.2	152222	k__Viruses	p__Peploviricota	c__Herviviricetes	o__Herpesvirales	f__Orthoherpesviridae	g__Simplexvirus	s__Simplexvirus humanalpha1	t__Human alphaherpesvirus 1	0.00722048	56	659	0.05483438661954251	0.9853576310066126	0.0	50950008
TAU_pos_SET6	Human orthorubulavirus 4	Human orthorubulavirus 4 isolate HPIV4a-HNRG	17170		OP615960.1	acc:OP615960.1	17170	k__Viruses	p__Negarnaviricota	c__Monjiviricetes	o__Mononegavirales	f__Paramyxoviridae	g__Orthorubulavirus	s__Orthorubulavirus hominis	t__Human orthorubulavirus 4	0.00571552	5	341	0.043156668608037276	0.9864842654807366	0.0	50950008
TAU_pos_SET6	Rhinovirus C	Rhinovirus C strain SC9996	7076		MN369031.1	set:MN369031	7076	k__Viruses	p__Pisuviricota	c__Pisoniviricetes	o__Picornavirales	f__Picornaviridae	g__Enterovirus	s__Rhinovirus C	t__Rhinovirus C	0.00554751	2	113	0.03165630299604296	0.9821414334688671	0.0	50950008
TAU_pos_SET6	rhinovirus A15	Rhinovirus A15 HRV_A15_Fukushima_O230_2018 RNA, nearly complete genome	7122		LC756673.1	acc:LC756673.1	7122	k__Viruses	p__Pisuviricota	c__Pisoniviricetes	o__Picornavirales	f__Picornaviridae	g__Enterovirus	s__Rhinovirus A	t__rhinovirus A15	0.00551168	2	149	0.04184217916315642	0.9731543624161074	0.0	50950008
TAU_pos_SET6	Human papillomavirus	MAG: Human papillomavirus isolate HPV-mSK_236	7127		MH777375.2	set:MH777375	7127	k__Viruses	p__Cossaviricota	c__Papovaviricetes	o__Zurhausenvirales	f__Papillomaviridae	g__Unclassified Papillomaviridae	s__Human papillomavirus	t__Human papillomavirus	0.00550781	2	145	0.04069033253823488	1.0	0.0	50950008
TAU_pos_SET6	Human papillomavirus	MAG: Human papillomavirus isolate HPV-mSK_105	7209		MH777247.2	set:MH777247	7209	k__Viruses	p__Cossaviricota	c__Papovaviricetes	o__Zurhausenvirales	f__Papillomaviridae	g__Unclassified Papillomaviridae	s__Human papillomavirus	t__Human papillomavirus	0.00544516	2	151	0.041892079345262866	1.0	0.0	50950008
TAU_pos_SET6	human papillomavirus 129	Human papillomavirus type 129	7219		NC_014953.1	GCF_000891495.1	7219	k__Viruses	p__Cossaviricota	c__Papovaviricetes	o__Zurhausenvirales	f__Papillomaviridae	g__Gammapapillomavirus	s__Gammapapillomavirus 9	t__Human papillomavirus type 129	0.00543762	2	170	0.04183404903726278	0.9834437086092715	0.0	50950008
TAU_pos_SET6	Human papillomavirus	MAG: Human papillomavirus isolate HPV-mSK_232	7228		MH777371.2	set:MH777371	7228	k__Viruses	p__Cossaviricota	c__Papovaviricetes	o__Zurhausenvirales	f__Papillomaviridae	g__Unclassified Papillomaviridae	s__Human papillomavirus	t__Human papillomavirus	0.00543085	2	295	0.04081350304371887	0.9966887417218543	0.0	50950008
TAU_pos_SET6	Human papillomavirus	MAG: Human papillomavirus isolate HPV-mSK_029	7229		MH777177.1	set:MH777177	7229	k__Viruses	p__Cossaviricota	c__Papovaviricetes	o__Zurhausenvirales	f__Papillomaviridae	g__Unclassified Papillomaviridae	s__Human papillomavirus	t__Human papillomavirus	0.0054301	2	200	0.04177617927790842	1.0	0.0	50950008
TAU_pos_SET6	Human papillomavirus	MAG: Human papillomavirus isolate HPV-mSK_057	7236		MH777202.2	set:MH777202	7236	k__Viruses	p__Cossaviricota	c__Papovaviricetes	o__Zurhausenvirales	f__Papillomaviridae	g__Unclassified Papillomaviridae	s__Human papillomavirus	t__Human papillomavirus	0.00542484	2	161	0.04173576561636263	1.0	0.0	50950008
TAU_pos_SET6	Human papillomavirus	MAG: Human papillomavirus isolate HPV-mSK_020	7248		MH777168.2	set:MH777168	7248	k__Viruses	p__Cossaviricota	c__Papovaviricetes	o__Zurhausenvirales	f__Papillomaviridae	g__Unclassified Papillomaviridae	s__Human papillomavirus	t__Human papillomavirus	0.00541586	2	172	0.04083885209713024	0.9221968485955697	0.0	50950008
TAU_pos_SET6	Human papillomavirus 111	Human papillomavirus type 111	7384		EU410349.1	set:EU410349	7384	k__Viruses	p__Cossaviricota	c__Papovaviricetes	o__Zurhausenvirales	f__Papillomaviridae	g__Betapapillomavirus	s__Betapapillomavirus 2	t__Human papillomavirus 111	0.00531611	2	139	0.03751354279523294	0.9927796892920446	0.0	50950008
TAU_pos_SET6	Human papillomavirus 151	Human papillomavirus type 151, isolate SIBX2	7386		FN677756.1	set:FN677756	7386	k__Viruses	p__Cossaviricota	c__Papovaviricetes	o__Zurhausenvirales	f__Papillomaviridae	g__Betapapillomavirus	s__Betapapillomavirus 2	t__Human papillomavirus 151	0.00531467	2	132	0.03574329813160033	0.9924242424242424	0.0	50950008
TAU_pos_SET6	Human papillomavirus 130	Human papillomavirus type 130	7388		GU117630.1	set:GU117630	7388	k__Viruses	p__Cossaviricota	c__Papovaviricetes	o__Zurhausenvirales	f__Papillomaviridae	g__Gammapapillomavirus	s__Gammapapillomavirus 10	t__Human papillomavirus 130	0.00531323	2	151	0.04087709799675149	1.0	0.0	50950008
TAU_pos_SET6	Human papillomavirus 17	Human papillomavirus type 17 isolate S410	7426		JN211195.1	set:JN211195	7426	k__Viruses	p__Cossaviricota	c__Papovaviricetes	o__Zurhausenvirales	f__Papillomaviridae	g__Betapapillomavirus	s__Betapapillomavirus 2	t__Human papillomavirus 17	0.00528604	2	136	0.036493401562079184	0.985239651416122	0.0	50950008
TAU_pos_SET6	Ovine enzootic nasal tumor virus	Ovine enzootic nasal tumour virus	7434		NC_007015.1	GCF_000861745.1	7434	k__Viruses	p__Artverviricota	c__Revtraviricetes	o__Ortervirales	f__Retroviridae	g__Betaretrovirus	s__Ovine enzootic nasal tumor virus	t__Ovine enzootic nasal tumor virus	0.00528036	2	142	0.0382028517621738	0.9612676056338028	0.0	50950008
TAU_pos_SET6	human papillomavirus 43	Human papillomavirus 43 isolate UC139_LW_V1	8007		OP971030.1	acc:OP971030.1	8007	k__Viruses	p__Cossaviricota	c__Papovaviricetes	o__Zurhausenvirales	f__Papillomaviridae	g__Alphapapillomavirus	s__Alphapapillomavirus 8	t__human papillomavirus 43	0.00490248	2	141	0.03521918321468715	1.0	0.0	50950008
TAU_pos_SET6	Formica exsecta virus 1	Formica exsecta virus 1 isolate Fex1	9554		NC_023021.1	GCF_000915215.1	9554	k__Viruses	p__Pisuviricota	c__Pisoniviricetes	o__Picornavirales	f__Dicistroviridae	g__Unclassified Dicistroviridae	s__Formica exsecta virus 1	t__Formica exsecta virus 1	0.00410866	2	118	0.024283022817667994	0.9741379310344828	0.0	50950008
TAU_pos_SET6	Bosavirus MS-2016a	Bosavirus MS-2016a	5371		NC_031959.2	GCF_002366225.2	5371	k__Viruses	p__Cossaviricota	c__Quintoviricetes	o__Piccovirales	f__Parvoviridae	g__Copiparvovirus	s__Copiparvovirus ungulate5	t__Bosavirus MS-2016a	0.00365427	1	110	0.020480357475330477	0.990909090909091	0.0	50950008
TAU_pos_SET6	Mamastrovirus 2	Mamastrovirus 2 strain AH-1-2020	6797		MN977118.1	acc:MN977118.1	6797	k__Viruses	p__Pisuviricota	c__Stelpaviricetes	o__Stellavirales	f__Astroviridae	g__Mamastrovirus	s__Mamastrovirus 2	t__Mamastrovirus 2	0.00288761	1	151	0.022215683389730765	0.9536423841059603	0.0	50950008
TAU_pos_SET6	Human papillomavirus	MAG: Human papillomavirus isolate HPV-mSK_114	7142		MH777256.2	set:MH777256	7142	k__Viruses	p__Cossaviricota	c__Papovaviricetes	o__Zurhausenvirales	f__Papillomaviridae	g__Unclassified Papillomaviridae	s__Human papillomavirus	t__Human papillomavirus	0.00274812	1	139	0.01946233548025763	1.0	0.0	50950008
TAU_pos_SET6	human papillomavirus 115	Human papillomavirus 115 isolate XJ-ZS137-1	7476		OL700030.1	acc:OL700030.1	7476	k__Viruses	p__Cossaviricota	c__Papovaviricetes	o__Zurhausenvirales	f__Papillomaviridae	g__Betapapillomavirus	s__Betapapillomavirus 3	t__human papillomavirus 115	0.00262535	1	151	0.02019796682718031	0.9403973509933775	0.0	50950008
TAU_pos_SET6	human papillomavirus 32	Human papillomavirus type 32	7961		NC_001586.1	GCF_000864925.1	7961	k__Viruses	p__Cossaviricota	c__Papovaviricetes	o__Zurhausenvirales	f__Papillomaviridae	g__Alphapapillomavirus	s__Alphapapillomavirus 1	t__Human papillomavirus type 32	0.0024654	1	151	0.018967466398693632	1.0	0.0	50950008
TAU_pos_SET6	human papillomavirus 89	Human papillomavirus - cand89	8078		AF436128.1	set:AF436128	8078	k__Viruses	p__Cossaviricota	c__Papovaviricetes	o__Zurhausenvirales	f__Papillomaviridae	g__Alphapapillomavirus	s__Alphapapillomavirus 3	t__human papillomavirus 89	0.0024297	1	112	0.01386481802426343	1.0	0.0	50950008
TAU_pos_SET6	Human alphaherpesvirus 2	Human herpesvirus 2 isolate 5 genome assembly: monopartite	138844		LT797632.1	set:LT797632	138844	k__Viruses	p__Peploviricota	c__Herviviricetes	o__Herpesvirales	f__Orthoherpesviridae	g__Simplexvirus	s__Simplexvirus humanalpha2	t__Human alphaherpesvirus 2	0.000706803	5	236	0.005423352827633891	0.9986577181208054	0.0	50950008
TAU_pos_SET6	Human betaherpesvirus 6B	Human herpesvirus 6B	162114		NC_000898.1	GCF_000846365.1	162114	k__Viruses	p__Peploviricota	c__Herviviricetes	o__Herpesvirales	f__Orthoherpesviridae	g__Roseolovirus	s__Roseolovirus humanbeta6b	t__Human betaherpesvirus 6B	0.000484279	4	244	0.0037196047226026128	0.9983333333333333	0.0	50950008
TAU_pos_SET6	Human betaherpesvirus 7	Human herpesvirus 7	153080		NC_001716.2	GCF_000848125.1	153080	k__Viruses	p__Peploviricota	c__Herviviricetes	o__Herpesvirales	f__Orthoherpesviridae	g__Roseolovirus	s__Roseolovirus humanbeta7	t__Human betaherpesvirus 7	0.000256429	2	151	0.0019728246668408674	1.0	0.0	50950008
TAU_pos_SET6	Retroperitoneal fibromatosis-associated herpesvirus	Retroperitoneal fibromatosis-associated herpesvirus isolate RFHVMnM78114	127320		NC_055135.1	GCF_004787155.1	127320	k__Viruses	p__Peploviricota	c__Herviviricetes	o__Herpesvirales	f__Orthoherpesviridae	g__Rhadinovirus	s__Rhadinovirus macacinegamma8	t__Retroperitoneal fibromatosis-associated herpesvirus	0.000154156	1	151	0.0011859880615771284	0.8079470198675497	0.0	50950008
TAU_pos_SET6	Equid gammaherpesvirus 2	Equid gammaherpesvirus 2 strain ER34/67	184010		MW322583.1	acc:MW322583.1	184010	k__Viruses	p__Peploviricota	c__Herviviricetes	o__Herpesvirales	f__Orthoherpesviridae	g__Percavirus	s__Percavirus equidgamma2	t__Equid gammaherpesvirus 2	0.000106663	1	99	0.0005380142383566111	0.8380952380952381	0.0	50950008
TAU_pos_SET8	Coxsackievirus B4	Human coxsackievirus B4 strain Tuscany	7395		DQ480420.1	set:DQ480420	7395	k__Viruses	p__Pisuviricota	c__Pisoniviricetes	o__Picornavirales	f__Picornaviridae	g__Enterovirus	s__Enterovirus B	t__Coxsackievirus B4	66305.2	30941339	7395	599022.2842461122	0.9977790337635373	0.002	63103464
TAU_pos_SET8	Human coronavirus 229E	Human coronavirus 229E	27317		NC_002645.1	GCF_000853505.1	27317	k__Viruses	p__Pisuviricota	c__Pisoniviricetes	o__Nidovirales	f__Coronaviridae	g__Alphacoronavirus	s__Human coronavirus 229E	t__Human coronavirus 229E	457.402	788469	27229	4149.066112677087	0.9982972008119584	0.001	63103464
TAU_pos_SET8	Human astrovirus 1	Human astrovirus 1 HAstV1/181937/Tokyo/2018 RNA, nearly complete genome	6861		LC694990.1	acc:LC694990.1	6861	k__Viruses	p__Pisuviricota	c__Stelpaviricetes	o__Stellavirales	f__Astroviridae	g__Mamastrovirus	s__Mamastrovirus 1	t__Human astrovirus 1	154.691	66974	6826	1402.4677160763738	0.976343007730805	0.012	63103464
TAU_pos_SET8	Human mastadenovirus F	Human mastadenovirus F isolate Hannover_2022_10	34237		ON815883.1	acc:ON815883.1	34237	k__Viruses	p__Preplasmiviricota	c__Tectiliviricetes	o__Rowavirales	f__Adenoviridae	g__Mastadenovirus	s__Human mastadenovirus F	t__Human mastadenovirus F	13.529	29229	34182	121.96772497590327	0.998323928558949	0.001	63103464
TAU_pos_SET8	Human fecal virus Jorvi2	Human fecal virus Jorvi2	3925		NC_035212.1	GCF_002219885.1	3925	k__Viruses	p__Cressdnaviricota	c__Arfiviricetes	o__Cirlivirales	f__Circoviridae	g__Unclassified Circoviridae	s__Human fecal virus Jorvi2	t__Human fecal virus Jorvi2	12.9441	3206	3786	115.77834394904458	0.9628183991961384	0.006	63103464
TAU_pos_SET8	Astrovirus MLB1	Astrovirus MLB1	6171		NC_011400.1	GCF_000880715.1	6171	k__Viruses	p__Pisuviricota	c__Stelpaviricetes	o__Stellavirales	f__Astroviridae	g__Mamastrovirus	s__Mamastrovirus 6	t__Astrovirus MLB1	12.1979	4750	6133	110.55631178091072	0.9574803269900168	0.001	63103464
TAU_pos_SET8	JC polyomavirus	JC polyomavirus	5130		NC_001699.1	GCF_000863805.1	5130	k__Viruses	p__Cossaviricota	c__Papovaviricetes	o__Sepolyvirales	f__Polyomaviridae	g__Betapolyomavirus	s__Betapolyomavirus secuhominis	t__JC polyomavirus	4.35869	1411	4942	39.282846003898634	0.993542233384792	0.001	63103464
TAU_pos_SET8	adeno-associated virus 2	Adeno-associated virus - 2	4679		NC_001401.2	GCF_000838645.1	4679	k__Viruses	p__Cossaviricota	c__Quintoviricetes	o__Piccovirales	f__Parvoviridae	g__Dependoparvovirus	s__Dependoparvovirus primate1	t__adeno-associated virus 2	4.31821	1275	4517	39.20367599914512	0.9769472359930331	0.0	63103464
TAU_pos_SET8	Norovirus GII	Norovirus GII	7567		NC_039477.1	GCF_003638685.1	7567	k__Viruses	p__Pisuviricota	c__Pisoniviricetes	o__Picornavirales	f__Caliciviridae	g__Norovirus	s__Norwalk virus	t__norovirus GII.P16-GII.4	3.82615	1827	7545	34.684947799656406	0.9722048000859443	0.001	63103464
TAU_pos_SET8	Human bocavirus 3	Human bocavirus 3	5242		NC_012564.1	GCF_000882855.1	5242	k__Viruses	p__Cossaviricota	c__Quintoviricetes	o__Piccovirales	f__Parvoviridae	g__Bocaparvovirus	s__Bocaparvovirus primate1	t__Human bocavirus 3	3.33748	1104	5242	30.272033574971385	0.9969560159049786	0.0	63103464
TAU_pos_SET8	Betapolyomavirus hominis	BK polyomavirus	5153		NC_001538.1	GCF_000837865.1	5153	k__Viruses	p__Cossaviricota	c__Papovaviricetes	o__Sepolyvirales	f__Polyomaviridae	g__Betapolyomavirus	s__Betapolyomavirus hominis	t__Betapolyomavirus hominis	2.63245	856	4951	23.84552687754706	0.9790390706158498	0.0	63103464
TAU_pos_SET8	Bovine rotavirus A	Bovine rotavirus A isolate bovine-tc/USA/NCDV/1971/G6P[1] segment 11 NSP5 protein gene	597	11	JF693036.1	set:832cf24ae7abbe2b9a1fb51db9b8cbcb522fbbb0	17421	k__Viruses	p__Duplornaviricota	c__Resentoviricetes	o__Reovirales	f__Sedoreoviridae	g__Rotavirus	s__Rotavirus A	t__G6	1.72538	65	584	15.155778894472363	0.9808535459914917	0.0	63103464
TAU_pos_SET8	Aveparvovirus galliform1	Aveparvovirus galliform1 isolate IPV	5154		KU569162.1	set:KU569162	5154	k__Viruses	p__Cossaviricota	c__Quintoviricetes	o__Piccovirales	f__Parvoviridae	g__Aveparvovirus	s__Aveparvovirus galliform1	t__Aveparvovirus galliform1	1.67571	545	4630	15.254559565386108	0.9663784100785227	0.0	63103464
TAU_pos_SET8	Porcine stool-associated circular virus 4	Porcine stool-associated circular virus 4 isolate CP2	2980		NC_023877.1	GCF_000919035.1	2980	k__Viruses	p__Cressdnaviricota	c__Arfiviricetes	o__Cirlivirales	f__Circoviridae	g__Unclassified Circoviridae	s__Porcine stool-associated circular virus 4	t__Porcine stool-associated circular virus 4	1.65915	312	2906	14.910738255033557	0.961871057043773	0.0	63103464
TAU_pos_SET8	Chicken anemia virus	Chicken anemia virus	2319		NC_001427.1	GCF_000864805.1	2319	k__Viruses	p__Unclassified Viruses	c__Unclassified Viruses	o__Unclassified Viruses	f__Anelloviridae	g__Gyrovirus	s__Gyrovirus chickenanemia	t__Chicken anemia virus	1.53071	224	2115	13.663216903837862	0.9782934465550898	0.0	63103464
TAU_pos_SET8	Astrovirus MLB2	Astrovirus MLB2	6119		NC_016155.1	GCF_000895575.1	6119	k__Viruses	p__Pisuviricota	c__Stelpaviricetes	o__Stellavirales	f__Astroviridae	g__Unclassified Astroviridae	s__Astrovirus MLB2	t__Astrovirus MLB2	1.40885	544	5891	12.888543879718908	0.9833432260942435	0.0	63103464
TAU_pos_SET8	Human bocavirus 2	Human bocavirus 2 strain BJQ435	5307		JX257046.1	set:JX257046	5307	k__Viruses	p__Cossaviricota	c__Quintoviricetes	o__Piccovirales	f__Parvoviridae	g__Bocaparvovirus	s__Bocaparvovirus primate2	t__Human bocavirus 2	1.39747	468	5052	12.636517806670435	0.9708463626051295	0.0	63103464
TAU_pos_SET8	Canine astrovirus	Canine astrovirus strain HUN/2012/135	6571		KX599353.1	set:KX599353	6571	k__Viruses	p__Pisuviricota	c__Stelpaviricetes	o__Stellavirales	f__Astroviridae	g__Mamastrovirus	s__Canine astrovirus	t__Canine astrovirus	1.24441	516	5500	11.352305585146857	0.9627551726016411	0.0	63103464
TAU_pos_SET8	Merkel cell polyomavirus	Merkel cell polyomavirus isolate R17b	5387		NC_010277.2	GCF_000874865.1	5387	k__Viruses	p__Cossaviricota	c__Papovaviricetes	o__Sepolyvirales	f__Polyomaviridae	g__Alphapolyomavirus	s__Alphapolyomavirus quintihominis	t__Merkel cell polyomavirus	1.17963	401	5128	10.485799146092445	0.9977241975870766	0.0	63103464
TAU_pos_SET8	Sapovirus GI	Sapovirus GI Hu/GI.1/JPN/2011/KA-28 genomic RNA	7449		LC504342.1	acc:LC504342.1	7449	k__Viruses	p__Pisuviricota	c__Pisoniviricetes	o__Picornavirales	f__Caliciviridae	g__Sapovirus	s__Sapporo virus	t__Sapovirus GI	0.708424	333	6998	6.481406900255068	0.9569304211578695	0.0	63103464
TAU_pos_SET8	Canine bocavirus 1	Canine bocavirus 1 isolate Con-161	5413		NC_020499.1	GCF_000905315.1	5413	k__Viruses	p__Cossaviricota	c__Quintoviricetes	o__Piccovirales	f__Parvoviridae	g__Bocaparvovirus	s__Bocaparvovirus carnivoran2	t__Canine bocavirus 1	0.682126	233	4477	6.142989100314058	0.9809075400473436	0.0	63103464
TAU_pos_SET8	Sapovirus GII	Sapovirus GII GII.3-AK11-P1 RNA	7512		LC715150.1	acc:LC715150.1	7512	k__Viruses	p__Pisuviricota	c__Pisoniviricetes	o__Picornavirales	f__Caliciviridae	g__Sapovirus	s__Sapporo virus	t__Sapovirus GII	0.672949	319	6567	6.136980830670926	0.9601141746710293	0.0	63103464
TAU_pos_SET8	Sapovirus GII	Sapovirus GII Hu/GII.1/JPN/2014/OS-282 genomic RNA	7527		LC504404.1	acc:LC504404.1	7527	k__Viruses	p__Pisuviricota	c__Pisoniviricetes	o__Picornavirales	f__Caliciviridae	g__Sapovirus	s__Sapporo virus	t__Sapovirus GII	0.650554	309	6707	5.974757539524379	0.9622885859936788	0.002	63103464
TAU_pos_SET8	human gammaherpesvirus 4	Human gammaherpesvirus 4	171823		NC_007605.1	GCF_002402265.1	171823	k__Viruses	p__Peploviricota	c__Herviviricetes	o__Herpesvirales	f__Orthoherpesviridae	g__Lymphocryptovirus	s__Lymphocryptovirus humangamma4	t__Human gammaherpesvirus 4	0.643848	6981	131139	5.673786396466131	0.990273995390818	0.0	63103464
TAU_pos_SET8	Rotavirus A	Rotavirus A strain RVA/Human-wt/PRY/1701SR/2009/G1P[9] segment 4 outer capsid spike protein VP4 (VP4) gene	2333	4	KJ412623.1	set:851a655d6244905dd4a1d5fc5c97a775bae53c21	18020	k__Viruses	p__Duplornaviricota	c__Resentoviricetes	o__Reovirales	f__Sedoreoviridae	g__Rotavirus	s__Rotavirus A	t__6	0.624913	92	2111	5.6939562794684955	0.9423821646023991	0.0	63103464
TAU_pos_SET8	Human papillomavirus type 8	Human papillomavirus type 8	7654		M12737.1	set:M12737	7654	k__Viruses	p__Cossaviricota	c__Papovaviricetes	o__Zurhausenvirales	f__Papillomaviridae	g__Betapapillomavirus	s__Betapapillomavirus 1	t__Human papillomavirus type 8	0.616985	298	6818	5.64515286124902	0.9937772966234061	0.0	63103464
TAU_pos_SET8	Bovine rotavirus A	Bovine rotavirus A isolate bovine-tc/USA/NCDV/1971/G6P[1] segment 6 VP6 protein gene	1194	6	JF693031.1	set:832cf24ae7abbe2b9a1fb51db9b8cbcb522fbbb0	17421	k__Viruses	p__Duplornaviricota	c__Resentoviricetes	o__Reovirales	f__Sedoreoviridae	g__Rotavirus	s__Rotavirus A	t__G6	0.597248	45	860	5.492462311557789	0.9546648648773045	0.0	63103464
TAU_pos_SET8	Mammalian orthoreovirus	Mammalian orthoreovirus isolate WIV8 lambda-3 gene	3830	1	KT444562.1	set:9e48756ded0e74cf162eb201d6dc7ddba4de3a0e	23419	k__Viruses	p__Duplornaviricota	c__Resentoviricetes	o__Reovirales	f__Spinareoviridae	g__Orthoreovirus	s__Mammalian orthoreovirus	t__T1	0.492374	119	3404	4.465013054830287	0.9611748623211438	0.0	63103464
TAU_pos_SET8	Rotavirus A	Rotavirus A strain RVA/Human-wt/USA2008747500/2008/G3P[8] segment 9 glycoprotein VP7 (VP7) gene	1018	9	HM773653.1	set:4a5d978274bd092fba040d0a00d76c755b5da6f3	18060	k__Viruses	p__Duplornaviricota	c__Resentoviricetes	o__Reovirales	f__Sedoreoviridae	g__Rotavirus	s__Rotavirus A	t__G3P[8]	0.43587	28	400	3.944007858546169	0.9130412321949366	0.0	63103464
TAU_pos_SET8	Feline coronavirus	Feline coronavirus isolate Black	29256		EU186072.1	set:EU186072	29256	k__Viruses	p__Pisuviricota	c__Pisoniviricetes	o__Nidovirales	f__Coronaviridae	g__Alphacoronavirus	s__Alphacoronavirus 1	t__Feline coronavirus	0.430625	795	18480	3.9376196335794367	0.9416617529093464	0.0	63103464
TAU_pos_SET8	Mamastrovirus 2	Mamastrovirus 2 isolate MAV2/17HRB0511	6802		MK671307.1	set:MK671307	6802	k__Viruses	p__Pisuviricota	c__Stelpaviricetes	o__Stellavirales	f__Astroviridae	g__Mamastrovirus	s__Mamastrovirus 2	t__Mamastrovirus 2	0.421686	181	4262	3.8422522787415465	0.9373949777066976	0.0	63103464
TAU_pos_SET8	Bovine rotavirus A	Bovine rotavirus A isolate bovine-tc/USA/NCDV/1971/G6P[1] segment 1 VP1 protein gene	3267	1	JF693026.1	set:832cf24ae7abbe2b9a1fb51db9b8cbcb522fbbb0	17421	k__Viruses	p__Duplornaviricota	c__Resentoviricetes	o__Reovirales	f__Sedoreoviridae	g__Rotavirus	s__Rotavirus A	t__G6	0.417154	86	1896	3.771349862258953	0.9470140571294425	0.0	63103464
TAU_pos_SET8	Bovine rotavirus A	Bovine rotavirus A isolate bovine-tc/USA/NCDV/1971/G6P[1] segment 7 NSP2 protein gene	954	7	JF693032.1	set:832cf24ae7abbe2b9a1fb51db9b8cbcb522fbbb0	17421	k__Viruses	p__Duplornaviricota	c__Resentoviricetes	o__Reovirales	f__Sedoreoviridae	g__Rotavirus	s__Rotavirus A	t__G6	0.415278	25	801	3.890985324947589	0.9078257153774888	0.0	63103464
TAU_pos_SET8	Human circovirus VS6600022	Human circovirus VS6600022	2836		NC_024694.1	GCF_000924015.1	2836	k__Viruses	p__Cressdnaviricota	c__Arfiviricetes	o__Cirlivirales	f__Circoviridae	g__Circovirus	s__Human circovirus VS6600022	t__Human circovirus VS6600022	0.368795	66	2339	3.260225669957687	0.9687766689954541	0.0	63103464
TAU_pos_SET8	Human picobirnavirus	Human picobirnavirus RNA segment 2, complete sequence	1745	2	NC_007027.1	GCF_000859285.1	4270	k__Viruses	p__Pisuviricota	c__Duplopiviricetes	o__Durnavirales	f__Picobirnaviridae	g__Orthopicobirnavirus	s__Orthopicobirnavirus hominis	t__Orthopicobirnavirus hominis	0.326929	36	1127	2.884240687679083	0.9478170185608482	0.0	63103464
TAU_pos_SET8	Norovirus GII	Norovirus GII isolate GII/Hu/RU/2022/GII.3[P12]/Nizhny_Novgorod589	7586		OP901693.1	acc:OP901693.1	7586	k__Viruses	p__Pisuviricota	c__Pisoniviricetes	o__Picornavirales	f__Caliciviridae	g__Norovirus	s__Norwalk virus	t__norovirus GII.P12-GII.3	0.323792	155	4438	2.9845768520959663	0.9718171202312722	0.0	63103464
TAU_pos_SET8	Severe acute respiratory syndrome coronavirus 2	SARS-CoV-2 Omicron-BA.1.17	29793	NA	OL898817.1	acc:OL898817.1	29793	k__Viruses	p__Pisuviricota	c__Pisoniviricetes	o__Nidovirales	f__Coronaviridae	g__Betacoronavirus	s__Severe acute respiratory syndrome-related coronavirus	t__SARS-CoV-2_Omicron	0.311163	585	17718	2.808142852347867	0.9976672511969603	0.0	63103464
TAU_pos_SET8	aichivirus A1	Aichivirus A1 strain A_RIVM_R04-15/Hu/NL/2019	8252		OP255993.1	acc:OP255993.1	8252	k__Viruses	p__Pisuviricota	c__Pisoniviricetes	o__Picornavirales	f__Picornaviridae	g__Kobuvirus	s__Kobuvirus aichi	t__aichivirus A1	0.311102	162	5657	2.8464614638875423	0.9604102312304003	0.0	63103464
TAU_pos_SET8	Rotavirus A	Rotavirus A strain RVA/Human-wt/USA2008747500/2008/G3P[8] segment 11 NSP5 (NSP5) and NSP6 (NSP6) genes	631	11	HM773655.1	set:4a5d978274bd092fba040d0a00d76c755b5da6f3	18060	k__Viruses	p__Duplornaviricota	c__Resentoviricetes	o__Reovirales	f__Sedoreoviridae	g__Rotavirus	s__Rotavirus A	t__G3P[8]	0.301369	12	272	2.675118858954041	0.9720411063919935	0.0	63103464
TAU_pos_SET8	Bovine rotavirus A	Bovine rotavirus A isolate bovine-tc/USA/NCDV/1971/G6P[1] segment 3 VP3 protein gene	2508	3	JF693028.1	set:832cf24ae7abbe2b9a1fb51db9b8cbcb522fbbb0	17421	k__Viruses	p__Duplornaviricota	c__Resentoviricetes	o__Reovirales	f__Sedoreoviridae	g__Rotavirus	s__Rotavirus A	t__G6	0.284336	45	1525	2.660287081339713	0.9288773877669788	0.0	63103464
TAU_pos_SET8	Porcine picobirnavirus	Porcine picobirnavirus strain 221/04-16/ITA/2004 segment S, complete sequence	1730	S	NC_029802.1	GCF_001611625.1	4396	k__Viruses	p__Pisuviricota	c__Duplopiviricetes	o__Durnavirales	f__Picobirnaviridae	g__Picobirnavirus	s__Porcine picobirnavirus	t__Porcine picobirnavirus	0.274803	30	615	2.5121387283236993	0.9170548672834684	0.0	63103464
TAU_pos_SET8	Bovine rotavirus A	Bovine rotavirus A isolate bovine-tc/USA/NCDV/1971/G6P[1] segment 2 VP2 protein gene	2643	2	JF693027.1	set:832cf24ae7abbe2b9a1fb51db9b8cbcb522fbbb0	17421	k__Viruses	p__Duplornaviricota	c__Resentoviricetes	o__Reovirales	f__Sedoreoviridae	g__Rotavirus	s__Rotavirus A	t__G6	0.239833	40	1473	2.157018539538403	0.923057074332063	0.0	63103464
TAU_pos_SET8	Human parechovirus 1B	Human parechovirus 1B strain HPeV-1B/USA/WA-UW-6bd44/2021	7268		OR728261.1	acc:OR728261.1	7268	k__Viruses	p__Pisuviricota	c__Pisoniviricetes	o__Picornavirales	f__Picornaviridae	g__Parechovirus	s__Human parechovirus 1B	t__Human parechovirus 1B	0.237661	109	1898	2.175839295542102	0.9795897293092297	0.0	63103464
TAU_pos_SET8	Human picobirnavirus	Human picobirnavirus RNA segment 1, complete sequence	2525	1	NC_007026.1	GCF_000859285.1	4270	k__Viruses	p__Pisuviricota	c__Duplopiviricetes	o__Durnavirales	f__Picobirnaviridae	g__Orthopicobirnavirus	s__Orthopicobirnavirus hominis	t__Orthopicobirnavirus hominis	0.232213	37	1399	2.14970297029703	0.9492891154246882	0.0	63103464
TAU_pos_SET8	Avian leukosis virus	Avian leukosis virus isolate SD110503R	7708		KF738251.1	set:KF738251	7708	k__Viruses	p__Artverviricota	c__Revtraviricetes	o__Ortervirales	f__Retroviridae	g__Alpharetrovirus	s__Avian leukosis virus	t__Avian leukosis virus	0.228207	111	2654	2.096523092890503	0.9775090701296222	0.0	63103464
TAU_pos_SET8	Cucurbit aphid-borne yellows virus	Cucurbit aphid-borne yellows virus strain Sq/2005/9.2	5675	NA	JF939813.1	set:JF939813	5675	k__Viruses	p__Pisuviricota	c__Pisoniviricetes	o__Sobelivirales	f__Solemoviridae	g__Polerovirus	s__Cucurbit aphid-borne yellows virus	t__Cucurbit aphid-borne yellows virus	0.223394	80	2503	2.0311894273127753	0.9771546094212337	0.0	63103464
TAU_pos_SET8	Human adenovirus 31	Human adenovirus 31 isolate HAdV-A31/USA/16G2/2018	33806		OR777233.1	acc:OR777233.1	33806	k__Viruses	p__Preplasmiviricota	c__Tectiliviricetes	o__Rowavirales	f__Adenoviridae	g__Mastadenovirus	s__Human mastadenovirus A	t__Human adenovirus 31	0.223131	476	17032	1.9916878660592794	0.9962518303746204	0.0	63103464
TAU_pos_SET8	Anellovirus D_HF7_66	Anellovirus D_HF7_66	3789		OR148955.1	acc:OR148955.1	3789	k__Viruses	p__Unclassified Viruses	c__Unclassified Viruses	o__Unclassified Viruses	f__Anelloviridae	g__Unclassified Anelloviridae	s__Anellovirus D_HF7_66	t__Anellovirus D_HF7_66	0.192389	46	1262	1.6917392451834257	0.9473348826211307	0.0	63103464
TAU_pos_SET8	Torque teno virus	MAG: Torque teno virus isolate SAfiA-274-0	3713		MN768563.1	acc:MN768563.1	3713	k__Viruses	p__Unclassified Viruses	c__Unclassified Viruses	o__Unclassified Viruses	f__Anelloviridae	g__Unclassified Anelloviridae	s__Torque teno virus	t__Torque teno virus	0.192059	45	948	1.7425262590896848	0.9580425952254051	0.0	63103464
TAU_pos_SET8	Rotavirus A	Rotavirus A strain RVA/Human-wt/USA2008747500/2008/G3P[8] segment 8 non-structural protein NSP2 (NSP2) gene	1019	8	HM773652.1	set:4a5d978274bd092fba040d0a00d76c755b5da6f3	18060	k__Viruses	p__Duplornaviricota	c__Resentoviricetes	o__Reovirales	f__Sedoreoviridae	g__Rotavirus	s__Rotavirus A	t__G3P[8]	0.186618	12	151	1.689892051030422	0.9559241786407439	0.0	63103464
TAU_pos_SET8	Rotavirus A	Rotavirus A strain RVA/Human-wt/USA2008747500/2008/G3P[8] segment 10 NSP4 (NSP4) gene	706	10	HM773654.1	set:4a5d978274bd092fba040d0a00d76c755b5da6f3	18060	k__Viruses	p__Duplornaviricota	c__Resentoviricetes	o__Reovirales	f__Sedoreoviridae	g__Rotavirus	s__Rotavirus A	t__G3P[8]	0.179569	8	265	1.6954674220963173	0.9716423542748047	0.0	63103464
TAU_pos_SET8	Astrovirus MLB3	Astrovirus MLB3 isolate MLB3/human/Vellore/26564/2004	6124		NC_019028.1	GCF_000899535.1	6124	k__Viruses	p__Pisuviricota	c__Stelpaviricetes	o__Stellavirales	f__Astroviridae	g__Unclassified Astroviridae	s__Astrovirus MLB3	t__Astrovirus MLB3	0.160437	62	2942	1.4452971913781842	0.9862972125728293	0.0	63103464
TAU_pos_SET8	Rotavirus A	Rotavirus A strain RVA/Human-wt/USA2008747500/2008/G3P[8] segment 4 VP4 (VP4) gene	2333	4	HM773648.1	set:4a5d978274bd092fba040d0a00d76c755b5da6f3	18060	k__Viruses	p__Duplornaviricota	c__Resentoviricetes	o__Reovirales	f__Sedoreoviridae	g__Rotavirus	s__Rotavirus A	t__G3P[8]	0.156228	23	977	1.4877839691384485	0.9720491409924182	0.0	63103464
TAU_pos_SET8	Norovirus GII	Norovirus GII isolate NORO_94_23_10_2014	7550		MH218733.1	set:MH218733	7550	k__Viruses	p__Pisuviricota	c__Pisoniviricetes	o__Picornavirales	f__Caliciviridae	g__Norovirus	s__Norwalk virus	t__norovirus GII.P31 (GII.Pe)-GII.2	0.13853	66	2720	1.2939072847682118	0.9461117324566468	0.0	63103464
TAU_pos_SET8	Bovine rotavirus A	Bovine rotavirus A isolate bovine-tc/USA/NCDV/1971/G6P[1] segment 8 NSP3 protein gene	942	8	JF693033.1	set:832cf24ae7abbe2b9a1fb51db9b8cbcb522fbbb0	17421	k__Viruses	p__Duplornaviricota	c__Resentoviricetes	o__Reovirales	f__Sedoreoviridae	g__Rotavirus	s__Rotavirus A	t__G6	0.134582	8	216	1.0318471337579618	0.9489861935019219	0.0	63103464
TAU_pos_SET8	Human papillomavirus 4	Human papillomavirus type 4	7353		NC_001457.1	GCF_000864845.1	7353	k__Viruses	p__Cossaviricota	c__Papovaviricetes	o__Zurhausenvirales	f__Papillomaviridae	g__Gammapapillomavirus	s__Gammapapillomavirus 1	t__Human papillomavirus 4	0.125	58	3527	1.1555827553379574	0.9989582521750422	0.0	63103464
TAU_pos_SET8	Molluscum contagiosum virus subtype 1	Molluscum contagiosum virus subtype 1	190289		NC_001731.1	GCF_000843325.1	190289	k__Viruses	p__Nucleocytoviricota	c__Pokkesviricetes	o__Chitovirales	f__Poxviridae	g__Molluscipoxvirus	s__Molluscum contagiosum virus	t__Molluscum contagiosum virus subtype 1	0.122253	1468	65982	1.0940726999458719	0.9886126465100273	0.0	63103464
TAU_pos_SET8	Parvovirus NIH-CQV	Parvovirus NIH-CQV putative 15-kDa protein, putative replication associated protein (rep), and putative capsid protein (cap) genes	3780		NC_022089.1	GCF_000910875.1	3780	k__Viruses	p__Cossaviricota	c__Quintoviricetes	o__Piccovirales	f__Parvoviridae	g__Unclassified Parvoviridae	s__Parvovirus NIH-CQV	t__Parvovirus NIH-CQV	0.121577	29	1757	1.0764550264550266	0.9795521919661702	0.0	63103464
TAU_pos_SET8	Avian gyrovirus 2	Avian gyrovirus 2	2383		NC_015396.1	GCF_000891935.1	2383	k__Viruses	p__Unclassified Viruses	c__Unclassified Viruses	o__Unclassified Viruses	f__Anelloviridae	g__Gyrovirus	s__Gyrovirus galga1	t__Avian gyrovirus 2	0.1197	18	1253	1.1007133864876206	0.9621299302318059	0.0	63103464
TAU_pos_SET8	TTV-like mini virus	TTV-like mini virus isolate TTMV_LY1	2912		NC_020498.1	GCF_000905335.1	2912	k__Viruses	p__Unclassified Viruses	c__Unclassified Viruses	o__Unclassified Viruses	f__Anelloviridae	g__Betatorquevirus	s__TTV-like mini virus	t__TTV-like mini virus	0.114281	21	508	0.9649725274725275	0.9737906350688629	0.0	63103464
TAU_pos_SET8	Rotavirus A	Rotavirus A strain RVA/Human-wt/USA2008747500/2008/G3P[8] segment 1 RNA-directed RNA polymerase VP1 (VP1) gene	3269	1	HM773645.1	set:4a5d978274bd092fba040d0a00d76c755b5da6f3	18060	k__Viruses	p__Duplornaviricota	c__Resentoviricetes	o__Reovirales	f__Sedoreoviridae	g__Rotavirus	s__Rotavirus A	t__G3P[8]	0.111496	23	1214	1.0416029366778832	0.9569408656716216	0.0	63103464
TAU_pos_SET8	rhinovirus C40	Rhinovirus C40 isolate 470389	7043		MZ268694.1	acc:MZ268694.1	7043	k__Viruses	p__Pisuviricota	c__Pisoniviricetes	o__Picornavirales	f__Picornaviridae	g__Enterovirus	s__Rhinovirus C	t__rhinovirus C40	0.108002	48	564	1.0208717875905153	0.9844502065843822	0.0	63103464
TAU_pos_SET8	Chicken astrovirus	Chicken astrovirus isolate CAstV/CA-AB/Chicken/17-0773b/17	7490		MT789783.1	acc:MT789783.1	7490	k__Viruses	p__Pisuviricota	c__Stelpaviricetes	o__Stellavirales	f__Astroviridae	g__Avastrovirus	s__Chicken astrovirus	t__Chicken astrovirus	0.105788	50	1988	0.9542056074766355	0.9454400878341227	0.0	63103464
TAU_pos_SET8	Parus major densovirus	Parus major densovirus isolate PmDNV-JL	5166		NC_031450.1	GCF_001777225.1	5166	k__Viruses	p__Cossaviricota	c__Quintoviricetes	o__Piccovirales	f__Parvoviridae	g__Blattambidensovirus	s__Blattambidensovirus incertum1	t__Parus major densovirus	0.104297	34	1297	0.8910181958962446	0.991827736136325	0.0	63103464
TAU_pos_SET8	Hepatitis E virus	Hepatitis E virus isolate 47832	7423		KC618402.1	set:KC618402	7423	k__Viruses	p__Kitrinoviricota	c__Alsuviricetes	o__Hepelivirales	f__Hepeviridae	g__Unclassified Hepeviridae	s__Hepatitis E virus	t__Hepatitis E virus	0.100338	47	1710	0.894786474471238	0.9557279076437845	0.0	63103464
TAU_pos_SET8	Mupapillomavirus 1	Human papillomavirus - 1	7815		NC_001356.1	GCF_000866405.1	7815	k__Viruses	p__Cossaviricota	c__Papovaviricetes	o__Zurhausenvirales	f__Papillomaviridae	g__Mupapillomavirus	s__Mupapillomavirus 1	t__Mupapillomavirus 1	0.0993605	49	2262	0.9151631477927064	0.9961800012526686	0.0	63103464
TAU_pos_SET8	Mammalian orthoreovirus	Mammalian orthoreovirus isolate WIV8 sigma-3 gene	1160	10	KT444571.1	set:9e48756ded0e74cf162eb201d6dc7ddba4de3a0e	23419	k__Viruses	p__Duplornaviricota	c__Resentoviricetes	o__Reovirales	f__Spinareoviridae	g__Orthoreovirus	s__Mammalian orthoreovirus	t__T1	0.0956284	7	331	0.8568965517241379	0.9252504118398157	0.0	63103464
TAU_pos_SET8	Torque teno virus	Torque teno virus, isolate tth5	3700		AJ620227.1	set:AJ620227	3700	k__Viruses	p__Unclassified Viruses	c__Unclassified Viruses	o__Unclassified Viruses	f__Anelloviridae	g__Unclassified Anelloviridae	s__Torque teno virus	t__Torque teno virus	0.0942253	22	249	0.8056756756756757	0.9534141803914467	0.0	63103464
TAU_pos_SET8	Rotavirus A	Rotavirus A strain RVA/Human-wt/USA2008747500/2008/G3P[8] segment 7 NSP3 (NSP3) gene	1015	7	HM773651.1	set:4a5d978274bd092fba040d0a00d76c755b5da6f3	18060	k__Viruses	p__Duplornaviricota	c__Resentoviricetes	o__Reovirales	f__Sedoreoviridae	g__Rotavirus	s__Rotavirus A	t__G3P[8]	0.0936768	6	247	0.8334975369458129	0.9342154595465854	0.0	63103464
TAU_pos_SET8	Rotavirus A	Rotavirus A strain RVA/Human-wt/PRY/1701SR/2009/G1P[9] segment 5 non-structural protein 1 (NSP1) gene	1531	5	KJ412615.1	set:851a655d6244905dd4a1d5fc5c97a775bae53c21	18020	k__Viruses	p__Duplornaviricota	c__Resentoviricetes	o__Reovirales	f__Sedoreoviridae	g__Rotavirus	s__Rotavirus A	t__6	0.0931567	9	643	0.8412802090137165	0.9016150679804181	0.0	63103464
TAU_pos_SET8	Mammalian orthoreovirus	Mammalian orthoreovirus isolate WIV8 mu-NS gene	2219	6	KT444567.1	set:9e48756ded0e74cf162eb201d6dc7ddba4de3a0e	23419	k__Viruses	p__Duplornaviricota	c__Resentoviricetes	o__Reovirales	f__Spinareoviridae	g__Orthoreovirus	s__Mammalian orthoreovirus	t__T1	0.0928395	13	499	0.8639026588553402	0.9810310024077078	0.0	63103464
TAU_pos_SET8	Canine circovirus	Canine circovirus isolate UCD1-1698	2063		NC_020904.1	GCF_000906275.1	2063	k__Viruses	p__Cressdnaviricota	c__Arfiviricetes	o__Cirlivirales	f__Circoviridae	g__Circovirus	s__Circovirus canine	t__Circovirus canine	0.0921783	12	544	0.859428017450315	0.9732701809885863	0.0	63103464
TAU_pos_SET8	Bocaparvovirus primate1	Primate bocaparvovirus 1 isolate st2	5299		NC_007455.1	GCF_000866725.1	5299	k__Viruses	p__Cossaviricota	c__Quintoviricetes	o__Piccovirales	f__Parvoviridae	g__Bocaparvovirus	s__Bocaparvovirus primate1	t__Bocaparvovirus primate1	0.0897169	30	1602	0.8184563125117946	0.9977486947685623	0.0	63103464
TAU_pos_SET8	human papillomavirus 20	Human papillomavirus type 20	7757		U31778.1	set:U31778	7757	k__Viruses	p__Cossaviricota	c__Papovaviricetes	o__Zurhausenvirales	f__Papillomaviridae	g__Betapapillomavirus	s__Betapapillomavirus 1	t__human papillomavirus 20	0.085803	42	2087	0.7893515534356066	0.9983684407444537	0.0	63103464
TAU_pos_SET8	Norovirus GII	Norovirus GII isolate GII/Hu/RU/2022/GII.6[P7]/Nizhny_Novgorod496	7587		OP901692.1	acc:OP901692.1	7587	k__Viruses	p__Pisuviricota	c__Pisoniviricetes	o__Picornavirales	f__Caliciviridae	g__Norovirus	s__Norwalk virus	t__norovirus GII.P7-GII.6	0.0835481	40	1899	0.7651245551601423	0.9763181259108856	0.0	63103464
TAU_pos_SET8	Human papillomavirus 65	Human papillomavirus type 65 complete genome	7308		X70829.1	set:X70829	7308	k__Viruses	p__Cossaviricota	c__Papovaviricetes	o__Zurhausenvirales	f__Papillomaviridae	g__Gammapapillomavirus	s__Gammapapillomavirus 1	t__Human papillomavirus 65	0.0802324	37	1460	0.6908866995073891	0.9952422766324616	0.0	63103464
TAU_pos_SET8	Chum salmon reovirus CS	Chum salmon reovirus CS segment 4	1619	4	NC_007585.1	GCF_000866805.1	23015	k__Viruses	p__Duplornaviricota	c__Resentoviricetes	o__Reovirales	f__Spinareoviridae	g__Aquareovirus	s__Aquareovirus salmonis		0.0783051	8	147	0.6189005558987029	0.9378752849716674	0.0	63103464
TAU_pos_SET8	Rotavirus A	Rotavirus A strain RVA/Human-wt/USA2008747500/2008/G3P[8] segment 2 VP2 (VP2) gene	2698	2	HM773646.1	set:4a5d978274bd092fba040d0a00d76c755b5da6f3	18060	k__Viruses	p__Duplornaviricota	c__Resentoviricetes	o__Reovirales	f__Sedoreoviridae	g__Rotavirus	s__Rotavirus A	t__G3P[8]	0.0763569	13	781	0.7079318013343218	0.9751863373111789	0.0	63103464
TAU_pos_SET8	Porcine parvovirus 5	Porcine parvovirus 5 isolate IA469 clone 1	5805		NC_023020.1	GCF_000914195.1	5805	k__Viruses	p__Cossaviricota	c__Quintoviricetes	o__Piccovirales	f__Parvoviridae	g__Protoparvovirus	s__Porcine parvovirus 5	t__Porcine parvovirus 5	0.0737069	27	1318	0.6499569336778639	0.9876072223829245	0.0	63103464
TAU_pos_SET8	Avian leukosis virus	Avian leukosis virus strain GD19ZH02	7614		MT538249.1	acc:MT538249.1	7614	k__Viruses	p__Artverviricota	c__Revtraviricetes	o__Ortervirales	f__Retroviridae	g__Alpharetrovirus	s__Avian leukosis virus	t__Avian leukosis virus	0.0728454	35	1233	0.6688993958497504	0.9377550365323464	0.0	63103464
TAU_pos_SET8	Rotavirus A	Rotavirus A strain RVA/Human-wt/USA2008747500/2008/G3P[8] segment 6 inner capsid protein VP6 (VP6) gene	1320	6	HM773650.1	set:4a5d978274bd092fba040d0a00d76c755b5da6f3	18060	k__Viruses	p__Duplornaviricota	c__Resentoviricetes	o__Reovirales	f__Sedoreoviridae	g__Rotavirus	s__Rotavirus A	t__G3P[8]	0.0720318	6	281	0.6363636363636364	0.9822675697038532	0.0	63103464
TAU_pos_SET8	Canine parvovirus	Canine parvovirus	5323		NC_001539.1	GCF_000848925.1	5323	k__Viruses	p__Cossaviricota	c__Quintoviricetes	o__Piccovirales	f__Parvoviridae	g__Protoparvovirus	s__Protoparvovirus carnivoran1	t__Canine parvovirus	0.0684728	23	951	0.6355438662408416	0.9922257414339188	0.0	63103464
TAU_pos_SET8	Mammalian orthoreovirus	Mammalian orthoreovirus isolate WIV8 sigma-NS gene	1182	9	KT444570.1	set:9e48756ded0e74cf162eb201d6dc7ddba4de3a0e	23419	k__Viruses	p__Duplornaviricota	c__Resentoviricetes	o__Reovirales	f__Spinareoviridae	g__Orthoreovirus	s__Mammalian orthoreovirus	t__T1	0.0670346	5	355	0.6387478849407784	0.9536423841059601	0.0	63103464
TAU_pos_SET8	Gyrovirus 4	Gyrovirus 4	2034		NC_018401.1	GCF_000899075.1	2034	k__Viruses	p__Unclassified Viruses	c__Unclassified Viruses	o__Unclassified Viruses	f__Anelloviridae	g__Gyrovirus	s__Gyrovirus homsa3	t__Gyrovirus 4	0.0623284	8	429	0.5275319567354966	1.0	0.0	63103464
TAU_pos_SET8	Tomato brown rugose fruit virus	Tomato brown rugose fruit virus isolate Tom1-Jo	6393		NC_028478.1	GCF_001461485.1	6393	k__Viruses	p__Kitrinoviricota	c__Alsuviricetes	o__Martellivirales	f__Virgaviridae	g__Tobamovirus	s__Tomato brown rugose fruit virus	t__Tomato brown rugose fruit virus	0.0594913	24	1172	0.5163460034412639	1.0	0.0	63103464
TAU_pos_SET8	Human papillomavirus type 195	Human papillomavirus type 195 isolate ACS380	7569		KR816182.1	set:KR816182	7569	k__Viruses	p__Cossaviricota	c__Papovaviricetes	o__Zurhausenvirales	f__Papillomaviridae	g__Betapapillomavirus	s__Betapapillomavirus 1	t__Human papillomavirus type 195	0.0565291	27	1716	0.5155238472717664	0.9805488107354401	0.0	63103464
TAU_pos_SET8	human papillomavirus 124	Human papillomavirus type 124	7489		GQ845446.1	set:GQ845446	7489	k__Viruses	p__Cossaviricota	c__Papovaviricetes	o__Zurhausenvirales	f__Papillomaviridae	g__Betapapillomavirus	s__Betapapillomavirus 1	t__human papillomavirus 124	0.0550169	26	1948	0.5164908532514354	0.9826642893530312	0.0	63103464
TAU_pos_SET8	WU Polyomavirus	WU Polyomavirus	5229		NC_009539.1	GCF_000870785.1	5229	k__Viruses	p__Cossaviricota	c__Papovaviricetes	o__Sepolyvirales	f__Polyomaviridae	g__Betapolyomavirus	s__Betapolyomavirus quartihominis	t__WU Polyomavirus	0.0545507	18	1331	0.494358385924651	0.9868522913865395	0.0	63103464
TAU_pos_SET8	Human papillomavirus type 63	Human papillomavirus type 63	7348		NC_001458.1	GCF_000865565.1	7348	k__Viruses	p__Cossaviricota	c__Papovaviricetes	o__Zurhausenvirales	f__Papillomaviridae	g__Mupapillomavirus	s__Mupapillomavirus 2	t__Human papillomavirus type 63	0.053916	25	1737	0.4933315187806206	0.9899520686231957	0.0	63103464
TAU_pos_SET8	Mammalian orthoreovirus	Mammalian orthoreovirus isolate WIV8 sigma-2 gene	1315	8	KT444569.1	set:9e48756ded0e74cf162eb201d6dc7ddba4de3a0e	23419	k__Viruses	p__Duplornaviricota	c__Resentoviricetes	o__Reovirales	f__Spinareoviridae	g__Orthoreovirus	s__Mammalian orthoreovirus	t__T1	0.0482038	4	352	0.42889733840304184	0.948448005661999	0.0	63103464
TAU_pos_SET8	human papillomavirus 36	Human papillomavirus type 36	7722		U31785.1	set:U31785	7722	k__Viruses	p__Cossaviricota	c__Papovaviricetes	o__Zurhausenvirales	f__Papillomaviridae	g__Betapapillomavirus	s__Betapapillomavirus 1	t__human papillomavirus 36	0.0472003	23	1244	0.43537943537943535	0.9994241289951051	0.0	63103464
TAU_pos_SET8	Cucumber green mottle mosaic virus	Cucumber green mottle mosaic virus	6424		NC_001801.1	GCF_000849225.1	6424	k__Viruses	p__Kitrinoviricota	c__Alsuviricetes	o__Martellivirales	f__Virgaviridae	g__Tobamovirus	s__Cucumber green mottle mosaic virus	t__Cucumber green mottle mosaic virus	0.04687	19	912	0.40099626400996263	0.9843527171353186	0.0	63103464
TAU_pos_SET8	Human papillomavirus	Human papillomavirus isolate DyskB	7427		KX781286.1	set:KX781286	7427	k__Viruses	p__Cossaviricota	c__Papovaviricetes	o__Zurhausenvirales	f__Papillomaviridae	g__Unclassified Papillomaviridae	s__Human papillomavirus	t__Human papillomavirus	0.0448077	21	790	0.4086441362595934	0.9676451614687935	0.0	63103464
TAU_pos_SET8	Norovirus GII	Norovirus GII isolate NORO_236_29_01_2016	7502		MH218692.1	set:MH218692	7502	k__Viruses	p__Pisuviricota	c__Pisoniviricetes	o__Picornavirales	f__Caliciviridae	g__Norovirus	s__Norwalk virus	t__norovirus GII.P7-GII.7	0.0443597	21	1109	0.375366568914956	0.9733304792965534	0.0	63103464
TAU_pos_SET8	Sewage-associated gemycircularvirus 6	Sewage-associated gemycircularvirus 6	2147		NC_026162.1	GCF_000930835.1	2147	k__Viruses	p__Cressdnaviricota	c__Repensiviricetes	o__Geplafuvirales	f__Genomoviridae	g__Gemycircularvirus	s__Gemycircularvirus sewopo3	t__Sewage-associated gemycircularvirus 6	0.044286	6	323	0.3446669771774569	1.0	0.0	63103464
TAU_pos_SET8	Canine kobuvirus	Canine kobuvirus strain CaKoV-26	8312		MH747478.1	set:MH747478	8312	k__Viruses	p__Pisuviricota	c__Pisoniviricetes	o__Picornavirales	f__Picornaviridae	g__Kobuvirus	s__Canine kobuvirus	t__Canine kobuvirus	0.0438499	23	1138	0.38426371511068336	0.9489499738496867	0.0	63103464
TAU_pos_SET8	Bovine rotavirus A	Bovine rotavirus A isolate bovine-tc/USA/NCDV/1971/G6P[1] segment 5 NSP1 protein gene	1476	5	JF693030.1	set:832cf24ae7abbe2b9a1fb51db9b8cbcb522fbbb0	17421	k__Viruses	p__Duplornaviricota	c__Resentoviricetes	o__Reovirales	f__Sedoreoviridae	g__Rotavirus	s__Rotavirus A	t__G6	0.0429458	4	163	0.4092140921409214	0.9801324503311258	0.0	63103464
TAU_pos_SET8	Human papillomavirus 110	Human papillomavirus type 110	7423		EU410348.1	set:EU410348	7423	k__Viruses	p__Cossaviricota	c__Papovaviricetes	o__Zurhausenvirales	f__Papillomaviridae	g__Betapapillomavirus	s__Betapapillomavirus 2	t__Human papillomavirus 110	0.042697	20	1287	0.40603529570254615	0.997682119205298	0.0	63103464
TAU_pos_SET8	Protoparvovirus primate1	Primate protoparvovirus 1 strain BF.86 NS1, putative VP1, hypothetical protein, and VP2 genes	4822		NC_038544.1	GCF_002827465.1	4822	k__Viruses	p__Cossaviricota	c__Quintoviricetes	o__Piccovirales	f__Parvoviridae	g__Protoparvovirus	s__Protoparvovirus primate1	t__Protoparvovirus primate1	0.0394367	12	630	0.3204064703442555	0.989433388022857	0.0	63103464
TAU_pos_SET8	Simian picobirnavirus	Simian picobirnavirus isolate 13R segment 2-2, complete sequence	1678	2-2	KY120186.1	set:1b2d5b0be644340eabf7b328eff48ae6ead4a670	3412	k__Viruses	p__Pisuviricota	c__Duplopiviricetes	o__Durnavirales	f__Picobirnaviridae	g__Unclassified Picobirnaviridae	s__Simian picobirnavirus	t__Simian picobirnavirus	0.0377759	4	152	0.3593563766388558	0.9800993377483443	0.0	63103464
TAU_pos_SET8	Betapolyomavirus tertihominis	KI polyomavirus Stockholm 60	5040		NC_009238.1	GCF_000873085.1	5040	k__Viruses	p__Cossaviricota	c__Papovaviricetes	o__Sepolyvirales	f__Polyomaviridae	g__Betapolyomavirus	s__Betapolyomavirus tertihominis	t__Betapolyomavirus tertihominis	0.0377309	12	450	0.3132936507936508	0.9994444444444445	0.0	63103464
TAU_pos_SET8	Human polyomavirus 6	Human polyomavirus 6	4926		NC_014406.1	GCF_000888495.1	4926	k__Viruses	p__Cossaviricota	c__Papovaviricetes	o__Sepolyvirales	f__Polyomaviridae	g__Deltapolyomavirus	s__Deltapolyomavirus sextihominis	t__Human polyomavirus 6	0.0353871	11	767	0.3211530653674381	0.9969655216999542	0.0	63103464
TAU_pos_SET8	Gammapapillomavirus 19	Gammapapillomavirus 19 isolate Gamma19_TVMBSGc2450	7289		MF588732.1	set:MF588732	7289	k__Viruses	p__Cossaviricota	c__Papovaviricetes	o__Zurhausenvirales	f__Papillomaviridae	g__Gammapapillomavirus	s__Gammapapillomavirus 19	t__Gammapapillomavirus 19	0.0347855	16	783	0.31513239127452325	0.9881435118541371	0.0	63103464
TAU_pos_SET8	Human adenovirus 2	Mutant Human adenovirus 2 isolate HAdV-C2-dE3B-CMV-GFP, complete sequence	36523		MT277585.1	set:MT277585	36523	k__Viruses	p__Preplasmiviricota	c__Tectiliviricetes	o__Rowavirales	f__Adenoviridae	g__Mastadenovirus	s__Human mastadenovirus C	t__Human adenovirus 2	0.0347113	80	3671	0.31755332256386387	0.9886516789807633	0.0	63103464
TAU_pos_SET8	Human coronavirus OC43	Human coronavirus OC43 strain ATCC VR-759	30741		NC_006213.1	GCF_003972325.1	30741	k__Viruses	p__Pisuviricota	c__Pisoniviricetes	o__Nidovirales	f__Coronaviridae	g__Betacoronavirus	s__Betacoronavirus 1	t__Human coronavirus OC43	0.034023	66	3251	0.30516248658143846	0.9867996744242292	0.0	63103464
TAU_pos_SET8	Torque teno virus	Torque teno virus DNA, isolate: JT41F	3727		AB064603.1	set:AB064603	3727	k__Viruses	p__Unclassified Viruses	c__Unclassified Viruses	o__Unclassified Viruses	f__Anelloviridae	g__Unclassified Anelloviridae	s__Torque teno virus	t__Torque teno virus	0.0340155	8	686	0.30855916286557555	0.9456770407150487	0.0	63103464
TAU_pos_SET8	Salivirus A	Salivirus A strain Hu/Baja-5332/2013/HUN	8021		KT240115.1	set:KT240115	8021	k__Viruses	p__Pisuviricota	c__Pisoniviricetes	o__Picornavirales	f__Picornaviridae	g__Salivirus	s__Salivirus A	t__Salivirus A	0.0335867	17	849	0.2816357062710385	0.9681215355169018	0.0	63103464
TAU_pos_SET8	Norovirus GII.17	Norovirus GII.17	7556		NC_039475.1	GCF_003638645.1	7556	k__Viruses	p__Pisuviricota	c__Pisoniviricetes	o__Picornavirales	f__Caliciviridae	g__Norovirus	s__Norwalk virus	t__norovirus GII.P17-GII.17	0.0335564	16	719	0.3047908946532557	0.9843133323353604	0.0	63103464
TAU_pos_SET8	Human papillomavirus 105	Human papillomavirus type 105	7667		FM955841.1	set:FM955841	7667	k__Viruses	p__Cossaviricota	c__Papovaviricetes	o__Zurhausenvirales	f__Papillomaviridae	g__Betapapillomavirus	s__Betapapillomavirus 1	t__Human papillomavirus 105	0.0330705	16	810	0.3095082822485979	0.9906266196372014	0.0	63103464
TAU_pos_SET8	Hetorquevirus hominid2	MAG: Torque teno hominid virus 2 isolate SAfiA-232-21	2918		MN769098.1	acc:MN769098.1	2918	k__Viruses	p__Unclassified Viruses	c__Unclassified Viruses	o__Unclassified Viruses	f__Anelloviridae	g__Hetorquevirus	s__Hetorquevirus hominid2	t__Torque teno hominid virus 2	0.0325846	6	369	0.296435915010281	0.9906010448295596	0.0	63103464
TAU_pos_SET8	Alphapapillomavirus 3	Human papillomavirus - 61	7989		NC_001694.1	GCF_000862805.1	7989	k__Viruses	p__Cossaviricota	c__Papovaviricetes	o__Zurhausenvirales	f__Papillomaviridae	g__Alphapapillomavirus	s__Alphapapillomavirus 3	t__Alphapapillomavirus 3	0.0317376	16	637	0.29089998748278884	0.9983416114790287	0.0	63103464
TAU_pos_SET8	Porcine circovirus 3	Porcine circovirus 3 strain 29160	2000		NC_031753.1	GCF_001866935.1	2000	k__Viruses	p__Cressdnaviricota	c__Arfiviricetes	o__Cirlivirales	f__Circoviridae	g__Circovirus	s__Circovirus porcine3	t__Circovirus porcine3	0.031694	4	324	0.302	0.9917218543046358	0.0	63103464
TAU_pos_SET8	Pepper mild mottle virus	Pepper mild mottle virus	6357		NC_003630.1	GCF_000859645.1	6357	k__Viruses	p__Kitrinoviricota	c__Alsuviricetes	o__Martellivirales	f__Virgaviridae	g__Tobamovirus	s__Pepper mild mottle virus	t__Pepper mild mottle virus	0.0299141	12	896	0.28299512348592104	0.985047349393736	0.0	63103464
TAU_pos_SET8	Pepper vein yellows virus	Pepper vein yellows virus isolate Guangxi	6075	NA	MW161057.1	acc:MW161057.1	6075	k__Viruses	p__Pisuviricota	c__Pisoniviricetes	o__Sobelivirales	f__Solemoviridae	g__Polerovirus	s__Pepper vein yellows virus	t__Pepper vein yellows virus	0.0286941	11	452	0.24477366255144034	0.9688906727317321	0.0	63103464
TAU_pos_SET8	Human papillomavirus type 60	Human papillomavirus type 60	7313		NC_001693.1	GCF_000838505.1	7313	k__Viruses	p__Cossaviricota	c__Papovaviricetes	o__Zurhausenvirales	f__Papillomaviridae	g__Gammapapillomavirus	s__Gammapapillomavirus 4	t__Human papillomavirus type 60	0.0281705	13	1220	0.26268289347736906	0.9839910577620715	0.0	63103464
TAU_pos_SET8	Human papillomavirus type 27b	Human papillomavirus type 27b DNA	7831		AB211993.1	set:AB211993	7831	k__Viruses	p__Cossaviricota	c__Papovaviricetes	o__Zurhausenvirales	f__Papillomaviridae	g__Alphapapillomavirus	s__Alphapapillomavirus 4	t__Human papillomavirus type 27b	0.0263071	13	740	0.24007151066275062	0.9868636393106208	0.0	63103464
TAU_pos_SET8	Human papillomavirus type 6b	Human papillomavirus type 6b	7902		NC_001355.1	GCF_000861945.1	7902	k__Viruses	p__Cossaviricota	c__Papovaviricetes	o__Zurhausenvirales	f__Papillomaviridae	g__Alphapapillomavirus	s__Alphapapillomavirus 10	t__Human papillomavirus type 6b	0.0260707	13	681	0.24512781574284992	0.9959246051961285	0.0	63103464
TAU_pos_SET8	Human papillomavirus 111	Human papillomavirus type 111	7384		EU410349.1	set:EU410349	7384	k__Viruses	p__Cossaviricota	c__Papovaviricetes	o__Zurhausenvirales	f__Papillomaviridae	g__Betapapillomavirus	s__Betapapillomavirus 2	t__Human papillomavirus 111	0.0257535	12	666	0.23036294691224268	0.9915612041938986	0.0	63103464
TAU_pos_SET8	Human papillomavirus 93	Human papillomavirus type 93	7450		AY382778.1	set:AY382778	7450	k__Viruses	p__Cossaviricota	c__Papovaviricetes	o__Zurhausenvirales	f__Papillomaviridae	g__Betapapillomavirus	s__Betapapillomavirus 1	t__Human papillomavirus 93	0.0255254	12	741	0.23261744966442954	0.9736200523722757	0.0	63103464
TAU_pos_SET8	human papillomavirus 24	Human papillomavirus type 24	7452		U31782.1	set:U31782	7452	k__Viruses	p__Cossaviricota	c__Papovaviricetes	o__Zurhausenvirales	f__Papillomaviridae	g__Betapapillomavirus	s__Betapapillomavirus 1	t__human papillomavirus 24	0.0255185	12	1098	0.24074074074074073	0.9917218543046357	0.0	63103464
TAU_pos_SET8	Feline bocavirus	Feline bocavirus	5331		NC_017823.1	GCF_000896155.1	5331	k__Viruses	p__Cossaviricota	c__Quintoviricetes	o__Piccovirales	f__Parvoviridae	g__Bocaparvovirus	s__Bocaparvovirus carnivoran3	t__Feline bocavirus	0.0237809	8	495	0.22341024198086662	0.9690320662788329	0.0	63103464
TAU_pos_SET8	Salivirus FHB	Salivirus FHB	7998		NC_025114.1	GCF_000926235.1	7998	k__Viruses	p__Pisuviricota	c__Pisoniviricetes	o__Picornavirales	f__Picornaviridae	g__Salivirus	s__Salivirus FHB	t__Salivirus FHB	0.0237764	12	1180	0.22005501375343836	0.9709973814932081	0.0	63103464
TAU_pos_SET8	Turnip yellows virus	Turnip yellows virus genome assembly: monopartite	5679	NA	LR584025.1	set:LR584025	5679	k__Viruses	p__Pisuviricota	c__Pisoniviricetes	o__Sobelivirales	f__Solemoviridae	g__Polerovirus	s__Turnip yellows virus	t__Turnip yellows virus	0.0223236	8	132	0.18031343546399015	0.98046875	0.0	63103464
TAU_pos_SET8	Human papillomavirus type XS2	Human papillomavirus type XS2 isolate GX-70	7830		OL817334.1	acc:OL817334.1	7830	k__Viruses	p__Cossaviricota	c__Papovaviricetes	o__Zurhausenvirales	f__Papillomaviridae	g__Alphapapillomavirus	s__Alphapapillomavirus 2	t__Human papillomavirus type XS2	0.0222627	11	543	0.2070242656449553	1.0	0.0	63103464
TAU_pos_SET8	Culex pipiens densovirus	Culex pipiens densovirus	5759		NC_012685.1	GCF_000883835.1	5759	k__Viruses	p__Cossaviricota	c__Quintoviricetes	o__Piccovirales	f__Parvoviridae	g__Protoambidensovirus	s__Protoambidensovirus dipteran1	t__Culex pipiens densovirus	0.0220135	8	491	0.20402847716617467	0.9754635891359973	0.0	63103464
TAU_pos_SET8	Human papillomavirus 159	Human papillomavirus type 159 complete genome, isolate SIBX8	7443		HE963025.1	set:HE963025	7443	k__Viruses	p__Cossaviricota	c__Papovaviricetes	o__Zurhausenvirales	f__Papillomaviridae	g__Betapapillomavirus	s__Betapapillomavirus 2	t__Human papillomavirus 159	0.0212911	10	329	0.19965067848985624	0.9944668304668303	0.0	63103464
TAU_pos_SET8	Felis catus papillomavirus 3	Felis catus papillomavirus-3	7583		NC_021472.1	GCF_000910155.1	7583	k__Viruses	p__Cossaviricota	c__Papovaviricetes	o__Zurhausenvirales	f__Papillomaviridae	g__Taupapillomavirus	s__Taupapillomavirus 3	t__Felis catus papillomavirus 3	0.020898	10	617	0.19266780957404722	1.0	0.0	63103464
TAU_pos_SET8	Human papillomavirus type 57b	Human papillomavirus type 57b complete genome	7868		U37537.1	set:U37537	7868	k__Viruses	p__Cossaviricota	c__Papovaviricetes	o__Zurhausenvirales	f__Papillomaviridae	g__Alphapapillomavirus	s__Alphapapillomavirus 4	t__Human papillomavirus type 57b	0.0201411	10	526	0.16077783426537876	0.9856363737548	0.0	63103464
TAU_pos_SET8	human papillomavirus 10	Human papillomavirus type 10 genomic DNA	7919		NC_001576.1	GCF_000864905.1	7919	k__Viruses	p__Cossaviricota	c__Papovaviricetes	o__Zurhausenvirales	f__Papillomaviridae	g__Alphapapillomavirus	s__Alphapapillomavirus 2	t__Human papillomavirus type 10	0.0200114	10	333	0.19042808435408512	0.9993377483443708	0.0	63103464
TAU_pos_SET8	Rotavirus A	Rotavirus A strain RVA/Human-wt/USA2008747500/2008/G3P[8] segment 3 guanylyltransferase VP3 (VP3) gene	2530	3	HM773647.1	set:4a5d978274bd092fba040d0a00d76c755b5da6f3	18060	k__Viruses	p__Duplornaviricota	c__Resentoviricetes	o__Reovirales	f__Sedoreoviridae	g__Rotavirus	s__Rotavirus A	t__G3P[8]	0.0187909	3	302	0.17905138339920948	0.9602649006622516	0.0	63103464
TAU_pos_SET8	Sapovirus GI	Sapovirus GI Hu/GI.2/JPN/2012/KA-30 genomic RNA	7624		LC504365.1	acc:LC504365.1	7624	k__Viruses	p__Pisuviricota	c__Pisoniviricetes	o__Picornavirales	f__Caliciviridae	g__Sapovirus	s__Sapporo virus	t__Sapovirus GI	0.0187071	9	751	0.1659233997901364	0.9679420041792108	0.0	63103464
TAU_pos_SET8	Gammapapillomavirus sp.	Gammapapillomavirus sp. isolate Gamma_w11C51	7191		NC_040688.1	GCF_004131545.1	7191	k__Viruses	p__Cossaviricota	c__Papovaviricetes	o__Zurhausenvirales	f__Papillomaviridae	g__Gammapapillomavirus	s__Gammapapillomavirus sp.	t__Gammapapillomavirus sp.	0.0176298	8	325	0.16353775552774302	0.9655907006900383	0.0	63103464
TAU_pos_SET8	Human papillomavirus	MAG: Human papillomavirus isolate HPV-mSK_159	7216		MH777301.2	set:MH777301	7216	k__Viruses	p__Cossaviricota	c__Papovaviricetes	o__Zurhausenvirales	f__Papillomaviridae	g__Unclassified Papillomaviridae	s__Human papillomavirus	t__Human papillomavirus	0.0175687	8	871	0.1629711751662971	0.995860927152318	0.0	63103464
TAU_pos_SET8	Human papillomavirus 134	Human papillomavirus type 134	7309		NC_014956.1	GCF_000889695.1	7309	k__Viruses	p__Cossaviricota	c__Papovaviricetes	o__Zurhausenvirales	f__Papillomaviridae	g__Gammapapillomavirus	s__Gammapapillomavirus 7	t__Human papillomavirus 134	0.0173452	8	617	0.1431112327267752	0.9880118692017132	0.0	63103464
TAU_pos_SET8	Human papillomavirus	MAG: Human papillomavirus isolate HPV-mSK_187	7329		MH777329.2	set:MH777329	7329	k__Viruses	p__Cossaviricota	c__Papovaviricetes	o__Zurhausenvirales	f__Papillomaviridae	g__Unclassified Papillomaviridae	s__Human papillomavirus	t__Human papillomavirus	0.0172978	8	515	0.1637331150225133	0.9823744481236202	0.0	63103464
TAU_pos_SET8	Human papillomavirus	MAG: Human papillomavirus isolate HPV-mSK_060	7415		MH777205.2	set:MH777205	7415	k__Viruses	p__Cossaviricota	c__Papovaviricetes	o__Zurhausenvirales	f__Papillomaviridae	g__Unclassified Papillomaviridae	s__Human papillomavirus	t__Human papillomavirus	0.0170972	8	704	0.16021577882670263	0.9923285141537159	0.0	63103464
TAU_pos_SET8	Human papillomavirus type 92	Human papillomavirus type 92	7461		NC_004500.1	GCF_000846285.1	7461	k__Viruses	p__Cossaviricota	c__Papovaviricetes	o__Zurhausenvirales	f__Papillomaviridae	g__Betapapillomavirus	s__Betapapillomavirus 4	t__Human papillomavirus type 92	0.0169918	8	467	0.15735156145288837	0.9981617647058822	0.0	63103464
TAU_pos_SET8	Norovirus GI	Norovirus GI isolate Hu/US/2016/GI.6[P11]/CA-RGDS-1110	7706		MZ227264.1	acc:MZ227264.1	7706	k__Viruses	p__Pisuviricota	c__Pisoniviricetes	o__Picornavirales	f__Caliciviridae	g__Norovirus	s__Norwalk virus	t__norovirus GI.P11 (GI.Pb)-GI.6	0.0164516	8	243	0.15676096548144303	0.980132450331126	0.0	63103464
TAU_pos_SET8	Human papillomavirus type 90	Human papillomavirus type 90	8033		NC_004104.1	GCF_000862685.1	8033	k__Viruses	p__Cossaviricota	c__Papovaviricetes	o__Zurhausenvirales	f__Papillomaviridae	g__Alphapapillomavirus	s__Alphapapillomavirus 14	t__Human papillomavirus type 90	0.0157819	8	284	0.12423752022905515	0.9919376879251179	0.0	63103464
TAU_pos_SET8	human papillomavirus 51	Human papillomavirus 51 isolate C16a_HPV51	8080		PP718700.1	acc:PP718700.1	8080	k__Viruses	p__Cossaviricota	c__Papovaviricetes	o__Zurhausenvirales	f__Papillomaviridae	g__Alphapapillomavirus	s__Alphapapillomavirus 5	t__human papillomavirus 51	0.0156901	8	144	0.14084158415841583	1.0	0.0	63103464
TAU_pos_SET8	Cardiovirus B	Cardiovirus B strain rat08/rCaB/HUN	8101		MN116646.1	set:MN116646	8101	k__Viruses	p__Pisuviricota	c__Pisoniviricetes	o__Picornavirales	f__Picornaviridae	g__Cardiovirus	s__Cardiovirus B	t__Cardiovirus B	0.0156494	8	571	0.14701888655721515	0.9493717871532441	0.0	63103464
TAU_pos_SET8	rhinovirus C6	Rhinovirus C6 HRV_C6_Fukushima_C6_2021 RNA, nearly complete genome	7149		LC720414.1	acc:LC720414.1	7149	k__Viruses	p__Pisuviricota	c__Pisoniviricetes	o__Picornavirales	f__Picornaviridae	g__Enterovirus	s__Rhinovirus C	t__rhinovirus C6	0.0155167	7	786	0.14603441040704992	0.9482712874484623	0.0	63103464
TAU_pos_SET8	Human papillomavirus type 49	Human papillomavirus type 49	7560		NC_001591.1	GCF_000862825.1	7560	k__Viruses	p__Cossaviricota	c__Papovaviricetes	o__Zurhausenvirales	f__Papillomaviridae	g__Betapapillomavirus	s__Betapapillomavirus 3	t__Human papillomavirus type 49	0.0146731	7	522	0.13558201058201058	0.9576999894880689	0.0	63103464
TAU_pos_SET8	Carrot red leaf virus	Carrot red leaf virus	5723	NA	NC_006265.1	GCF_000854305.1	5723	k__Viruses	p__Pisuviricota	c__Pisoniviricetes	o__Sobelivirales	f__Solemoviridae	g__Polerovirus	s__Carrot red leaf virus	t__Carrot red leaf virus	0.013845	5	574	0.131923816180325	0.9748344370860927	0.0	63103464
TAU_pos_SET8	rhinovirus A24	Human rhinovirus 24 strain ATCC VR-1134	7132		FJ445190.1	set:FJ445190	7132	k__Viruses	p__Pisuviricota	c__Pisoniviricetes	o__Picornavirales	f__Picornaviridae	g__Enterovirus	s__Rhinovirus A	t__rhinovirus A24	0.0133317	6	171	0.1254907459338194	0.9765610217596973	0.0	63103464
TAU_pos_SET8	Human papillomavirus 120	Human papillomavirus type 120 isolate CL3767	7307		JQ963484.1	set:JQ963484	7307	k__Viruses	p__Cossaviricota	c__Papovaviricetes	o__Zurhausenvirales	f__Papillomaviridae	g__Betapapillomavirus	s__Betapapillomavirus 2	t__Human papillomavirus 120	0.0130124	6	552	0.12289585329136445	0.9976689976689976	0.0	63103464
TAU_pos_SET8	Human papillomavirus	MAG: Human papillomavirus isolate HPV-mSK_158	7320		MH777300.2	set:MH777300	7320	k__Viruses	p__Cossaviricota	c__Papovaviricetes	o__Zurhausenvirales	f__Papillomaviridae	g__Unclassified Papillomaviridae	s__Human papillomavirus	t__Human papillomavirus	0.0129893	6	475	0.12377049180327869	0.9944812362030905	0.0	63103464
TAU_pos_SET8	Breda virus	Breda virus	28475		NC_007447.1	GCF_000865145.1	28475	k__Viruses	p__Pisuviricota	c__Pisoniviricetes	o__Nidovirales	f__Tobaniviridae	g__Torovirus	s__Bovine torovirus	t__Breda virus	0.0128	23	724	0.112414398595259	0.963832320637996	0.0	63103464
TAU_pos_SET8	Norovirus GII	Norovirus GII isolate Hu/US/2011/GII.6[P7]/CA-RGDS-1086	7533		MT712130.1	acc:MT712130.1	7533	k__Viruses	p__Pisuviricota	c__Pisoniviricetes	o__Picornavirales	f__Caliciviridae	g__Norovirus	s__Norwalk virus	t__norovirus GII.P33 (GII.Pg)-GII.12	0.0126221	6	560	0.11230585424133811	0.934219850433669	0.0	63103464
TAU_pos_SET8	Human papillomavirus 107	Human papillomavirus type 107	7562		EF422221.1	set:EF422221	7562	k__Viruses	p__Cossaviricota	c__Papovaviricetes	o__Zurhausenvirales	f__Papillomaviridae	g__Betapapillomavirus	s__Betapapillomavirus 2	t__Human papillomavirus 107	0.0125737	6	253	0.11861941285374239	0.9976689976689976	0.0	63103464
TAU_pos_SET8	Human papillomavirus type 54	Human papillomavirus 54	7759		NC_001676.1	GCF_000864725.1	7759	k__Viruses	p__Cossaviricota	c__Papovaviricetes	o__Zurhausenvirales	f__Papillomaviridae	g__Alphapapillomavirus	s__Alphapapillomavirus 13	t__Human papillomavirus type 54	0.0122544	6	304	0.11625209434205439	1.0	0.0	63103464
TAU_pos_SET8	Mammalian orthoreovirus	Mammalian orthoreovirus isolate WIV8 lambda-1 gene	3890	3	KT444564.1	set:9e48756ded0e74cf162eb201d6dc7ddba4de3a0e	23419	k__Viruses	p__Duplornaviricota	c__Resentoviricetes	o__Reovirales	f__Spinareoviridae	g__Orthoreovirus	s__Mammalian orthoreovirus	t__T1	0.0122213	3	174	0.1141388174807198	0.9076335870010226	0.0	63103464
TAU_pos_SET8	Alphapapillomavirus 4	Human papillomavirus - 2	7860		NC_001352.1	GCF_000864945.1	7860	k__Viruses	p__Cossaviricota	c__Papovaviricetes	o__Zurhausenvirales	f__Papillomaviridae	g__Alphapapillomavirus	s__Alphapapillomavirus 4	t__Alphapapillomavirus 4	0.0120969	6	539	0.10687022900763359	0.9439336641604673	0.0	63103464
TAU_pos_SET8	human papillomavirus 39	Human papillomavirus type 39 isolate LNS4492831_HPV39	7885		LR861904.1	acc:LR861904.1	7885	k__Viruses	p__Cossaviricota	c__Papovaviricetes	o__Zurhausenvirales	f__Papillomaviridae	g__Alphapapillomavirus	s__Alphapapillomavirus 7	t__human papillomavirus 39	0.0120586	6	420	0.11464806594800253	0.9933774834437087	0.0	63103464
TAU_pos_SET8	Porcine parvovirus 6	Porcine parvovirus 6 strain P15-1 nonstructural protein (QKJ52_gp1) and capsid protein (QKJ52_gp2) genes	5566		NC_075986.1	GCF_013087245.1	5566	k__Viruses	p__Cossaviricota	c__Quintoviricetes	o__Piccovirales	f__Parvoviridae	g__Copiparvovirus	s__Copiparvovirus ungulate4	t__Porcine parvovirus 6	0.0113884	4	339	0.09935321595400647	0.996031746031746	0.0	63103464
TAU_pos_SET8	RD114 retrovirus	RD114 retrovirus	8406		NC_009889.1	GCF_000873665.1	8406	k__Viruses	p__Artverviricota	c__Revtraviricetes	o__Ortervirales	f__Retroviridae	g__Gammaretrovirus	s__RD114 retrovirus	t__RD114 retrovirus	0.0113112	6	478	0.10718534380204615	0.9598491033898818	0.0	63103464
TAU_pos_SET8	Gammapapillomavirus 12	Gammapapillomavirus 12 isolate Gamma12_w23c77	7110		MF588719.1	set:MF588719	7110	k__Viruses	p__Cossaviricota	c__Papovaviricetes	o__Zurhausenvirales	f__Papillomaviridae	g__Gammapapillomavirus	s__Gammapapillomavirus 12	t__Gammapapillomavirus 12	0.0111442	5	276	0.09142053445850915	0.9973509933774836	0.0	63103464
TAU_pos_SET8	Bangali torovirus	Bangali torovirus strain Bangali/H.rufipes/2018 polyprotein 1ab (QKT20_gp1), spike (QKT20_gp2), membrane glycoprotein (QKT20_gp3), hemagglutinin esterase (QKT20_gp4), and N (QKT20_gp5) genes	28850		NC_076940.1	GCF_023156145.1	28850	k__Viruses	p__Pisuviricota	c__Pisoniviricetes	o__Nidovirales	f__Tobaniviridae	g__Torovirus	s__Torovirus banli	t__Bangali torovirus	0.0109858	20	1349	0.1022530329289428	0.9539325508869195	0.0	63103464
TAU_pos_SET8	Human papillomavirus 23	Human papillomavirus type 23	7324		U31781.1	set:U31781	7324	k__Viruses	p__Cossaviricota	c__Papovaviricetes	o__Zurhausenvirales	f__Papillomaviridae	g__Betapapillomavirus	s__Betapapillomavirus 2	t__Human papillomavirus 23	0.0108185	5	596	0.09844347351174222	0.9985714285714286	0.0	63103464
TAU_pos_SET8	Human papillomavirus type 88	Human papillomavirus type 88	7326		NC_010329.1	GCF_000874925.1	7326	k__Viruses	p__Cossaviricota	c__Papovaviricetes	o__Zurhausenvirales	f__Papillomaviridae	g__Gammapapillomavirus	s__Gammapapillomavirus 5	t__Human papillomavirus type 88	0.0108156	5	529	0.09705159705159705	0.9941573311877205	0.0	63103464
TAU_pos_SET8	Human respiratory circular DNA virus	Human respiratory circular DNA virus strain 181752	3050		MN535739.1	acc:MN535739.1	3050	k__Viruses	p__Cressdnaviricota	c__Arfiviricetes	o__Cirlivirales	f__Circoviridae	g__Unclassified Circoviridae	s__Human respiratory circular DNA virus	t__Human respiratory circular DNA virus	0.0103915	2	222	0.0980327868852459	0.9765527116520494	0.0	63103464
TAU_pos_SET8	Human papillomavirus 5	Human papillomoavirus type 5	7746		NC_001531.1	GCF_000866505.1	7746	k__Viruses	p__Cossaviricota	c__Papovaviricetes	o__Zurhausenvirales	f__Papillomaviridae	g__Betapapillomavirus	s__Betapapillomavirus 1	t__Human papillomavirus 5	0.0102291	5	605	0.09527498063516654	0.9551151527132549	0.0	63103464
TAU_pos_SET8	human papillomavirus 66	Human papillomavirus type 66 isolate LNS4474748_HPV66	7824		LR861902.1	acc:LR861902.1	7824	k__Viruses	p__Cossaviricota	c__Papovaviricetes	o__Zurhausenvirales	f__Papillomaviridae	g__Alphapapillomavirus	s__Alphapapillomavirus 6	t__human papillomavirus 66	0.0101272	5	590	0.09649795501022494	0.985430463576159	0.0	63103464
TAU_pos_SET8	Tomato mosaic virus	Tomato mosaic virus	6383		NC_002692.1	GCF_000853705.1	6383	k__Viruses	p__Kitrinoviricota	c__Alsuviricetes	o__Martellivirales	f__Virgaviridae	g__Tobamovirus	s__Tomato mosaic virus	t__Tomato mosaic virus	0.00993075	4	192	0.08459971800094	0.9924870610495855	0.0	63103464
TAU_pos_SET8	Picobirnavirus dog/KNA/2015	Picobirnavirus dog/KNA/2015 strain PBV/Dog/KNA/RVC7/2015 RNA-dependent RNA polymerase gene	1689	2	NC_035206.1	GCF_002219985.1	1689	k__Viruses	p__Pisuviricota	c__Duplopiviricetes	o__Durnavirales	f__Picobirnaviridae	g__Picobirnavirus	s__Picobirnavirus dog/KNA/2015	t__Picobirnavirus dog/KNA/2015	0.00938247	1	119	0.0704558910597987	0.957983193277311	0.0	63103464
TAU_pos_SET8	Human papillomavirus 175	Human papillomavirus type 175 isolate SE87	7226		NC_038524.1	GCF_002827025.1	7226	k__Viruses	p__Cossaviricota	c__Papovaviricetes	o__Zurhausenvirales	f__Papillomaviridae	g__Gammapapillomavirus	s__Gammapapillomavirus 23	t__Human papillomavirus 175	0.00877221	4	367	0.07998892886797675	0.9894935694503462	0.0	63103464
TAU_pos_SET8	Human papillomavirus 167	Human papillomavirus type 167 isolate KC10	7228		NC_022892.1	GCF_000913075.1	7228	k__Viruses	p__Cossaviricota	c__Papovaviricetes	o__Zurhausenvirales	f__Papillomaviridae	g__Gammapapillomavirus	s__Gammapapillomavirus 21	t__Human papillomavirus 167	0.00876978	4	337	0.08107360265633647	0.9929577464788732	0.0	63103464
TAU_pos_SET8	Human papillomavirus	MAG: Human papillomavirus isolate HPV-mSK_214	7334		MH777353.2	set:MH777353	7334	k__Viruses	p__Cossaviricota	c__Papovaviricetes	o__Zurhausenvirales	f__Papillomaviridae	g__Unclassified Papillomaviridae	s__Human papillomavirus	t__Human papillomavirus	0.00864303	4	174	0.08235614944095991	1.0	0.0	63103464
TAU_pos_SET8	Human papillomavirus type 38b	Human papillomavirus type 38b subtype FA125	7400		DQ090005.2	set:DQ090005	7400	k__Viruses	p__Cossaviricota	c__Papovaviricetes	o__Zurhausenvirales	f__Papillomaviridae	g__Betapapillomavirus	s__Betapapillomavirus 2	t__Human papillomavirus type 38b	0.00856594	4	285	0.07	0.9599583026735344	0.0	63103464
TAU_pos_SET8	Betapapillomavirus 4	Betapapillomavirus 4 isolate Beta04_m292c100	7443		MF588685.1	set:MF588685	7443	k__Viruses	p__Cossaviricota	c__Papovaviricetes	o__Zurhausenvirales	f__Papillomaviridae	g__Betapapillomavirus	s__Betapapillomavirus 4	t__Betapapillomavirus 4	0.00851645	4	467	0.08115007389493484	1.0	0.0	63103464
TAU_pos_SET8	Human papillomavirus 98	Human papillomavirus type 98	7466		FM955837.2	set:FM955837	7466	k__Viruses	p__Cossaviricota	c__Papovaviricetes	o__Zurhausenvirales	f__Papillomaviridae	g__Betapapillomavirus	s__Betapapillomavirus 1	t__Human papillomavirus 98	0.00849022	4	125	0.0664345030806322	1.0	0.0	63103464
TAU_pos_SET8	Cosavirus D	Cosavirus D isolate HCoSV/CHVir173/GER/2018	7698		MT094379.1	acc:MT094379.1	7698	k__Viruses	p__Pisuviricota	c__Pisoniviricetes	o__Picornavirales	f__Picornaviridae	g__Cosavirus	s__Cosavirus D	t__Cosavirus D	0.00823434	4	437	0.07833203429462197	0.9319867549668874	0.0	63103464
TAU_pos_SET8	Rattus norvegicus papillomavirus 3	Rattus norvegicus papillomavirus 3 isolate Rat_60S	7707		NC_028492.1	GCF_001461525.1	7707	k__Viruses	p__Cossaviricota	c__Papovaviricetes	o__Zurhausenvirales	f__Papillomaviridae	g__Iotapapillomavirus	s__Iotapapillomavirus 1	t__Rattus norvegicus papillomavirus 3	0.00822473	4	185	0.07629427792915532	0.9322928726902237	0.0	63103464
TAU_pos_SET8	Human papillomavirus type 34	Human papillomavirus type 34	7723		NC_001587.1	GCF_000863965.1	7723	k__Viruses	p__Cossaviricota	c__Papovaviricetes	o__Zurhausenvirales	f__Papillomaviridae	g__Alphapapillomavirus	s__Alphapapillomavirus 11	t__Human papillomavirus type 34	0.00820769	4	366	0.07264016573870258	0.9889853965019528	0.0	63103464
TAU_pos_SET8	human papillomavirus 21	Human papillomavirus type 21	7779		U31779.1	set:U31779	7779	k__Viruses	p__Cossaviricota	c__Papovaviricetes	o__Zurhausenvirales	f__Papillomaviridae	g__Betapapillomavirus	s__Betapapillomavirus 1	t__human papillomavirus 21	0.0081486	4	352	0.0637614089214552	0.9964539007092199	0.0	63103464
TAU_pos_SET8	human papillomavirus 45	Human papillomavirus type 45 isolate LNS2400068_HPV45	7866		LR861845.1	acc:LR861845.1	7866	k__Viruses	p__Cossaviricota	c__Papovaviricetes	o__Zurhausenvirales	f__Papillomaviridae	g__Alphapapillomavirus	s__Alphapapillomavirus 7	t__human papillomavirus 45	0.00805847	4	336	0.07093821510297482	0.9966887417218544	0.0	63103464
TAU_pos_SET8	Felis domesticus papillomavirus 2	Feline papillomavirus type 2 isolate Main Coon 2007	7899		NC_038520.1	GCF_002826945.1	7899	k__Viruses	p__Cossaviricota	c__Papovaviricetes	o__Zurhausenvirales	f__Papillomaviridae	g__Dyothetapapillomavirus	s__Dyothetapapillomavirus 1	t__Felis domesticus papillomavirus 2	0.00802481	4	357	0.07570578554247373	1.0	0.0	63103464
TAU_pos_SET8	Human papillomavirus 16	Human papillomavirus type 16	7906		NC_001526.4	GCF_000863945.3	7906	k__Viruses	p__Cossaviricota	c__Papovaviricetes	o__Zurhausenvirales	f__Papillomaviridae	g__Alphapapillomavirus	s__Alphapapillomavirus 9	t__Human papillomavirus type 16	0.0080177	4	210	0.06754363774348596	0.9893617021276595	0.0	63103464
TAU_pos_SET8	Cherry leaf roll virus	Cherry leaf roll virus isolate 19NR014 segment RNA1, complete sequence	7918	RNA1	MT935684.1	19NR014__Nepovirus_avii	14277	k__Viruses	p__Pisuviricota	c__Pisoniviricetes	o__Picornavirales	f__Secoviridae	g__Nepovirus	s__Nepovirus avii	t__Nepovirus avii	0.00800555	4	311	0.07148269765092195	0.9472205498695565	0.0	63103464
TAU_pos_SET8	Murine adeno-associated virus 2	Murine adeno-associated virus 2 isolate MAAV2/NYC/Manhattan/poolF1	4449		NC_055486.1	GCF_013087995.1	4449	k__Viruses	p__Cossaviricota	c__Quintoviricetes	o__Piccovirales	f__Parvoviridae	g__Dependoparvovirus	s__Dependoparvovirus rodent2	t__Murine adeno-associated virus 2	0.00712384	2	132	0.05933917734322319	0.9318181818181818	0.0	63103464
TAU_pos_SET8	Fowl aviadenovirus 6	Fowl adenovirus 6 strain CR119	43810		NC_038332.1	GCF_002817995.1	43810	k__Viruses	p__Preplasmiviricota	c__Tectiliviricetes	o__Rowavirales	f__Adenoviridae	g__Aviadenovirus	s__Fowl aviadenovirus E	t__Fowl aviadenovirus 6	0.0068727	19	883	0.06162976489385985	0.9630836160530333	0.0	63103464
TAU_pos_SET8	Adeno-associated virus	Adeno-associated virus isolate MHH-05-2015	4857		NC_040671.1	GCF_004129875.1	4857	k__Viruses	p__Cossaviricota	c__Quintoviricetes	o__Piccovirales	f__Parvoviridae	g__Dependoparvovirus	s__Adeno-associated virus	t__Adeno-associated virus	0.00652542	2	151	0.06197241095326333	0.8671081677704194	0.0	63103464
TAU_pos_SET8	Gyrovirus GyV7-SF	Gyrovirus GyV7-SF	2439		NC_025215.1	GCF_000924395.1	2439	k__Viruses	p__Unclassified Viruses	c__Unclassified Viruses	o__Unclassified Viruses	f__Anelloviridae	g__Gyrovirus	s__Gyrovirus galga2	t__Gyrovirus GyV7-SF	0.00649733	1	113	0.04633046330463304	1.0	0.0	63103464
TAU_pos_SET8	Parechovirus A	Parechovirus A isolate HMS	7355		MK904605.1	set:MK904605	7355	k__Viruses	p__Pisuviricota	c__Pisoniviricetes	o__Picornavirales	f__Picornaviridae	g__Parechovirus	s__Parechovirus A	t__Parechovirus A	0.00646376	3	104	0.042284160435078176	0.9807069952701021	0.0	63103464
TAU_pos_SET8	Human polyomavirus 7	Human polyomavirus 7	4952		NC_014407.1	GCF_000889175.1	4952	k__Viruses	p__Cossaviricota	c__Papovaviricetes	o__Sepolyvirales	f__Polyomaviridae	g__Deltapolyomavirus	s__Deltapolyomavirus septihominis	t__Human polyomavirus 7	0.00640024	2	163	0.06098546042003231	0.9933774834437086	0.0	63103464
TAU_pos_SET8	Sapovirus GII.8	Sapovirus GII.8 strain 05-099-515477/2014/TW	7576		MN102407.1	acc:MN102407.1	7576	k__Viruses	p__Pisuviricota	c__Pisoniviricetes	o__Picornavirales	f__Caliciviridae	g__Sapovirus	s__Sapporo virus	t__Sapovirus GII.8	0.00627521	3	336	0.05517423442449842	0.9357349470959884	0.0	63103464
TAU_pos_SET8	Betapolyomavirus canis	Canis familiaris polyomavirus 1 isolate R006926 CT2015	5070		NC_034456.1	GCF_002118645.1	5070	k__Viruses	p__Cossaviricota	c__Papovaviricetes	o__Sepolyvirales	f__Polyomaviridae	g__Betapolyomavirus	s__Betapolyomavirus canis	t__Betapolyomavirus canis	0.00625128	2	246	0.05680473372781065	0.9893894716488616	0.0	63103464
TAU_pos_SET8	Canine minute virus	Canine minute virus	5097		NC_004442.1	GCF_000863725.1	5097	k__Viruses	p__Cossaviricota	c__Quintoviricetes	o__Piccovirales	f__Parvoviridae	g__Bocaparvovirus	s__Bocaparvovirus carnivoran1	t__Canine minute virus	0.00621816	2	157	0.059250539533058665	0.9867549668874173	0.0	63103464
TAU_pos_SET8	human papillomavirus 69	Human papillomavirus 69 isolate UC094_LW_V2	7706		OP971051.1	acc:OP971051.1	7706	k__Viruses	p__Cossaviricota	c__Papovaviricetes	o__Zurhausenvirales	f__Papillomaviridae	g__Alphapapillomavirus	s__Alphapapillomavirus 5	t__human papillomavirus 69	0.00616934	3	352	0.058785362055541135	0.9933774834437085	0.0	63103464
TAU_pos_SET8	human papillomavirus 73	Human papillomavirus 73 isolate UC119_LW_V2	7807		OP971057.1	acc:OP971057.1	7807	k__Viruses	p__Cossaviricota	c__Papovaviricetes	o__Zurhausenvirales	f__Papillomaviridae	g__Alphapapillomavirus	s__Alphapapillomavirus 11	t__human papillomavirus 73	0.00608953	3	351	0.05802484949404381	0.9955849889624724	0.0	63103464
TAU_pos_SET8	human papillomavirus 11	Human papillomavirus type 11 isolate GUMC-AJ-Lung	10424		JN644142.1	set:JN644142	10424	k__Viruses	p__Cossaviricota	c__Papovaviricetes	o__Zurhausenvirales	f__Papillomaviridae	g__Alphapapillomavirus	s__Alphapapillomavirus 10	t__human papillomavirus 11	0.00608096	4	156	0.057847275518035306	0.9933664459161149	0.0	63103464
TAU_pos_SET8	LI polyomavirus	LI polyomavirus isolate LIPyV	5269		NC_034253.1	GCF_002080215.1	5269	k__Viruses	p__Cossaviricota	c__Papovaviricetes	o__Sepolyvirales	f__Polyomaviridae	g__Alphapolyomavirus	s__Alphapolyomavirus quardecihominis	t__LI polyomavirus	0.00601518	2	245	0.05731637881951034	1.0	0.0	63103464
TAU_pos_SET8	Feline bocaparvovirus 2	Feline bocavirus 2 isolate POR1	5479		NC_022800.1	GCF_000911415.1	5479	k__Viruses	p__Cossaviricota	c__Quintoviricetes	o__Piccovirales	f__Parvoviridae	g__Bocaparvovirus	s__Bocaparvovirus carnivoran4	t__Feline bocaparvovirus 2	0.00578463	2	179	0.055119547362657416	0.9602649006622517	0.0	63103464
TAU_pos_SET8	Broad bean wilt virus 2	Broad bean wilt virus 2 isolate BB2 segment RNA1, complete sequence	5952	RNA1	KC625492.1	set:e97c3d3c98eace6e10910f6fc7089d41d0ccdd9f	9520	k__Viruses	p__Pisuviricota	c__Pisoniviricetes	o__Picornavirales	f__Secoviridae	g__Fabavirus	s__Fabavirus betaviciae	t__Fabavirus betaviciae	0.00532493	2	175	0.05057123655913978	0.9435099337748344	0.0	63103464
TAU_pos_SET8	Torque teno midi virus	MAG: Torque teno midi virus isolate SAfiA-531-1	2988		MN774976.1	acc:MN774976.1	2988	k__Viruses	p__Unclassified Viruses	c__Unclassified Viruses	o__Unclassified Viruses	f__Anelloviridae	g__Unclassified Anelloviridae	s__Torque teno midi virus	t__Torque teno midi virus	0.00530354	1	150	0.050200803212851405	0.9801324503311258	0.0	63103464
TAU_pos_SET8	Citrus vein enation virus	Citrus vein enation virus, isolate VE-1	5983	NA	NC_021564.1	GCF_000910315.1	5983	k__Viruses	p__Pisuviricota	c__Pisoniviricetes	o__Sobelivirales	f__Solemoviridae	g__Enamovirus	s__Citrus vein enation virus	t__Citrus vein enation virus	0.00529734	2	264	0.04613070366037105	0.996	0.0	63103464
TAU_pos_SET8	Strawberry polerovirus 1	Strawberry polerovirus 1 isolate AB5301	5986	NA	NC_025435.1	GCF_000927455.1	5986	k__Viruses	p__Pisuviricota	c__Pisoniviricetes	o__Sobelivirales	f__Solemoviridae	g__Polerovirus	s__Strawberry polerovirus 1	t__Strawberry polerovirus 1	0.00529468	2	201	0.050283995990644835	0.9801103752759381	0.0	63103464
TAU_pos_SET8	Tobacco mild green mosaic virus	Tobacco mild green mosaic virus	6355		NC_001556.1	GCF_000847545.1	6355	k__Viruses	p__Kitrinoviricota	c__Alsuviricetes	o__Martellivirales	f__Virgaviridae	g__Tobamovirus	s__Tobacco mild green mosaic virus	t__Tobacco mild green mosaic virus	0.00498725	2	148	0.04657749803304485	0.9594594594594594	0.0	63103464
TAU_pos_SET8	Avian nephritis virus	MAG: Avian nephritis virus isolate ANV/ck/TZ/Iringa/2151-IM162/2019	6938		OQ685945.1	acc:OQ685945.1	6938	k__Viruses	p__Pisuviricota	c__Stelpaviricetes	o__Stellavirales	f__Astroviridae	g__Avastrovirus	s__Avian nephritis virus	t__Avian nephritis virus	0.00456817	2	158	0.04295185932545402	0.956503131053746	0.0	63103464
TAU_pos_SET8	rhinovirus A53	Rhinovirus A53 strain SC0894	7051		MN306049.1	set:MN306049	7051	k__Viruses	p__Pisuviricota	c__Pisoniviricetes	o__Picornavirales	f__Picornaviridae	g__Enterovirus	s__Rhinovirus A	t__rhinovirus A53	0.00449496	2	205	0.042688980286484185	0.9800441501103754	0.0	63103464
TAU_pos_SET8	Human papillomavirus	MAG: Human papillomavirus isolate HPV-mSK_114	7142		MH777256.2	set:MH777256	7142	k__Viruses	p__Cossaviricota	c__Papovaviricetes	o__Zurhausenvirales	f__Papillomaviridae	g__Unclassified Papillomaviridae	s__Human papillomavirus	t__Human papillomavirus	0.00443769	2	132	0.03696443573228787	1.0	0.0	63103464
TAU_pos_SET8	Human papillomavirus	MAG: Human papillomavirus isolate HPV-mSK_136	7193		MH777278.1	set:MH777278	7193	k__Viruses	p__Cossaviricota	c__Papovaviricetes	o__Zurhausenvirales	f__Papillomaviridae	g__Unclassified Papillomaviridae	s__Human papillomavirus	t__Human papillomavirus	0.00440623	2	143	0.03976087863200334	0.993006993006993	0.0	63103464
TAU_pos_SET8	Gammapapillomavirus sp.	Gammapapillomavirus sp. isolate Gamma_w34c04a	7226		NC_040550.1	GCF_004131605.1	7226	k__Viruses	p__Cossaviricota	c__Papovaviricetes	o__Zurhausenvirales	f__Papillomaviridae	g__Gammapapillomavirus	s__Gammapapillomavirus sp.	t__Gammapapillomavirus sp.	0.0043861	2	156	0.0417935233877664	0.9867549668874173	0.0	63103464
TAU_pos_SET8	hunnivirus A4	Norway rat hunnivirus isolate RatHuV/YY12/CHN	7282		MW417242.1	acc:MW417242.1	7282	k__Viruses	p__Pisuviricota	c__Pisoniviricetes	o__Picornavirales	f__Picornaviridae	g__Hunnivirus	s__Hunnivirus A	t__Norway rat hunnivirus	0.00435237	2	246	0.04147212304312002	0.9801324503311258	0.0	63103464
TAU_pos_SET8	Betapapillomavirus 2	Betapapillomavirus 2 isolate Beta02_m292c14	7323		MF588682.1	set:MF588682	7323	k__Viruses	p__Cossaviricota	c__Papovaviricetes	o__Zurhausenvirales	f__Papillomaviridae	g__Betapapillomavirus	s__Betapapillomavirus 2	t__Betapapillomavirus 2	0.00432801	2	221	0.03536801857162365	0.9920591120922246	0.0	63103464
TAU_pos_SET8	Human papillomavirus	MAG: Human papillomavirus isolate HPV-mSK_075	7349		MH777219.2	set:MH777219	7349	k__Viruses	p__Cossaviricota	c__Papovaviricetes	o__Zurhausenvirales	f__Papillomaviridae	g__Unclassified Papillomaviridae	s__Human papillomavirus	t__Human papillomavirus	0.00431269	2	161	0.04109402639814941	0.9801324503311258	0.0	63103464
TAU_pos_SET8	Human papillomavirus 174	Human papillomavirus type 174 complete genome, isolate V001	7359		HF930491.1	set:HF930491	7359	k__Viruses	p__Cossaviricota	c__Papovaviricetes	o__Zurhausenvirales	f__Papillomaviridae	g__Betapapillomavirus	s__Betapapillomavirus 2	t__Human papillomavirus 174	0.00430683	2	137	0.03723331974453051	1.0	0.0	63103464
TAU_pos_SET8	Human papillomavirus 104	Human papillomavirus type 104	7386		FM955840.1	set:FM955840	7386	k__Viruses	p__Cossaviricota	c__Papovaviricetes	o__Zurhausenvirales	f__Papillomaviridae	g__Betapapillomavirus	s__Betapapillomavirus 2	t__Human papillomavirus 104	0.00429109	2	158	0.040888166802057944	0.990066225165563	0.0	63103464
TAU_pos_SET8	Human papillomavirus 122	Human papillomavirus type 122	7397		GQ845444.1	set:GQ845444	7397	k__Viruses	p__Cossaviricota	c__Papovaviricetes	o__Zurhausenvirales	f__Papillomaviridae	g__Betapapillomavirus	s__Betapapillomavirus 2	t__Human papillomavirus 122	0.00428471	2	196	0.04082736244423415	1.0	0.0	63103464
TAU_pos_SET8	Bos taurus papillomavirus 10	Bovine papillomavirus-10 DNA	7399		AB331651.1	set:AB331651	7399	k__Viruses	p__Cossaviricota	c__Papovaviricetes	o__Zurhausenvirales	f__Papillomaviridae	g__Xipapillomavirus	s__Xipapillomavirus 1	t__Bos taurus papillomavirus 10	0.00428355	2	114	0.028111907014461413	0.9653465346534653	0.0	63103464
TAU_pos_SET8	Human papillomavirus	MAG: Human papillomavirus isolate HPV-mSK_082	7419		MH777225.2	set:MH777225	7419	k__Viruses	p__Cossaviricota	c__Papovaviricetes	o__Zurhausenvirales	f__Papillomaviridae	g__Unclassified Papillomaviridae	s__Human papillomavirus	t__Human papillomavirus	0.004272	2	197	0.03221458417576493	0.9080882352941176	0.0	63103464
TAU_pos_SET8	Human papillomavirus 9	Human papillomavirus type 9	7434		NC_001596.1	GCF_000863685.1	7434	k__Viruses	p__Cossaviricota	c__Papovaviricetes	o__Zurhausenvirales	f__Papillomaviridae	g__Betapapillomavirus	s__Betapapillomavirus 2	t__Human papillomavirus 9	0.00426338	2	170	0.040624159268227066	0.9933774834437086	0.0	63103464
TAU_pos_SET8	human papillomavirus 115	Human papillomavirus 115 isolate XJ-ZS137-1	7476		OL700030.1	acc:OL700030.1	7476	k__Viruses	p__Cossaviricota	c__Papovaviricetes	o__Zurhausenvirales	f__Papillomaviridae	g__Betapapillomavirus	s__Betapapillomavirus 3	t__human papillomavirus 115	0.00423943	2	185	0.04039593365436062	0.9933774834437086	0.0	63103464
TAU_pos_SET8	Norovirus GII	Norovirus GII isolate Hu/US/2020/GII.8[P8]/CA-RGDS-1153	7533		OP686904.1	acc:OP686904.1	7533	k__Viruses	p__Pisuviricota	c__Pisoniviricetes	o__Picornavirales	f__Caliciviridae	g__Norovirus	s__Norwalk virus	t__norovirus GII.P8-GII.8	0.00420735	2	157	0.040090269480950486	0.9271523178807947	0.0	63103464
TAU_pos_SET8	human papillomavirus 44	Human papillomavirus 44 isolate V523E06_HPV44	7836		OP712046.1	acc:OP712046.1	7836	k__Viruses	p__Cossaviricota	c__Papovaviricetes	o__Zurhausenvirales	f__Papillomaviridae	g__Alphapapillomavirus	s__Alphapapillomavirus 10	t__human papillomavirus 44	0.00404466	2	158	0.03662582950484941	0.9686285936285937	0.0	63103464
TAU_pos_SET8	Human papillomavirus type 53	Human papillomavirus type 53	7856		NC_001593.1	GCF_000865685.1	7856	k__Viruses	p__Cossaviricota	c__Papovaviricetes	o__Zurhausenvirales	f__Papillomaviridae	g__Alphapapillomavirus	s__Alphapapillomavirus 6	t__Human papillomavirus type 53	0.00403437	2	242	0.03844195519348269	0.9966887417218543	0.0	63103464
TAU_pos_SET8	human papillomavirus 56	Human papillomavirus 56 isolate UC094_LW_V2	7866		OP971047.1	acc:OP971047.1	7866	k__Viruses	p__Cossaviricota	c__Papovaviricetes	o__Zurhausenvirales	f__Papillomaviridae	g__Alphapapillomavirus	s__Alphapapillomavirus 6	t__human papillomavirus 56	0.00402924	2	125	0.03178235443681668	1.0	0.0	63103464
TAU_pos_SET8	human papillomavirus 82	Human papillomavirus 82 isolate Qv34162	7878		KF436789.1	set:KF436789	7878	k__Viruses	p__Cossaviricota	c__Papovaviricetes	o__Zurhausenvirales	f__Papillomaviridae	g__Alphapapillomavirus	s__Alphapapillomavirus 5	t__human papillomavirus 82	0.0040231	2	172	0.03833460269103833	0.9635761589403974	0.0	63103464
TAU_pos_SET8	human papillomavirus 230	Human papillomavirus 230 isolate C05_HPV230	7959		PP718696.1	acc:PP718696.1	7959	k__Viruses	p__Cossaviricota	c__Papovaviricetes	o__Zurhausenvirales	f__Papillomaviridae	g__Gammapapillomavirus	s__Gammapapillomavirus 11	t__human papillomavirus 230	0.00398216	2	302	0.03794446538509863	0.9966887417218543	0.0	63103464
TAU_pos_SET8	human papillomavirus 89	Human papillomavirus - cand89	8078		AF436128.1	set:AF436128	8078	k__Viruses	p__Cossaviricota	c__Papovaviricetes	o__Zurhausenvirales	f__Papillomaviridae	g__Alphapapillomavirus	s__Alphapapillomavirus 3	t__human papillomavirus 89	0.00392349	2	153	0.03738549145828175	0.9867549668874173	0.0	63103464
TAU_pos_SET8	Cutavirus	Cutavirus strain BR-337 NS1, putative VP1, hypothetical protein, VP2, and hypothetical protein genes	4456		NC_039050.1	GCF_003033315.1	4456	k__Viruses	p__Cossaviricota	c__Quintoviricetes	o__Piccovirales	f__Parvoviridae	g__Protoparvovirus	s__Protoparvovirus primate3	t__Cutavirus	0.00355633	1	151	0.03388689407540395	0.9602649006622517	0.0	63103464
TAU_pos_SET8	Rosavirus B	Rosavirus B strain RNCW0602091R polyprotein gene	8938		NC_031105.1	GCF_001744155.1	8938	k__Viruses	p__Pisuviricota	c__Pisoniviricetes	o__Picornavirales	f__Picornaviridae	g__Rosavirus	s__Rosavirus B	t__Rosavirus B	0.00354598	2	217	0.033788319534571495	0.9337748344370861	0.0	63103464
TAU_pos_SET8	Yongsan iflavirus 1	Yongsan iflavirus 1 strain A16.2047/ROK/2016 polyprotein gene	8977		NC_040587.1	GCF_004134745.1	8977	k__Viruses	p__Pisuviricota	c__Pisoniviricetes	o__Picornavirales	f__Iflaviridae	g__Unclassified Iflaviridae	s__Yongsan iflavirus 1	t__Yongsan iflavirus 1	0.00353058	2	253	0.033641528350228364	0.956953642384106	0.0	63103464
TAU_pos_SET8	Moku virus	Moku virus isolate Big Island	10056		NC_031338.1	GCF_001766585.1	10056	k__Viruses	p__Pisuviricota	c__Pisoniviricetes	o__Picornavirales	f__Iflaviridae	g__Iflavirus	s__Moku virus	t__Moku virus	0.00315175	2	139	0.02764518695306285	0.9856115107913669	0.0	63103464
TAU_pos_SET8	La Jolla virus	MAG: La Jolla virus isolate KOP20SW1	10253		OL472185.1	acc:OL472185.1	10253	k__Viruses	p__Pisuviricota	c__Pisoniviricetes	o__Picornavirales	f__Iflaviridae	g__Unclassified Iflaviridae	s__La Jolla virus	t__La Jolla virus	0.00309119	2	193	0.029454793718911538	0.9933774834437086	0.0	63103464
TAU_pos_SET8	Chili pepper mild mottle virus	Chili pepper mild mottle virus strain CPMMV/Spanish/2019	6405		OQ920979.1	acc:OQ920979.1	6405	k__Viruses	p__Kitrinoviricota	c__Alsuviricetes	o__Martellivirales	f__Virgaviridae	g__Tobamovirus	s__Chili pepper mild mottle virus	t__Chili pepper mild mottle virus	0.00247416	1	136	0.021233411397345824	0.9926470588235294	0.0	63103464
TAU_pos_SET8	Rhinovirus C	Human rhinovirus C isolate LZ269	7139		JF317013.1	set:JF317013	7139	k__Viruses	p__Pisuviricota	c__Pisoniviricetes	o__Picornavirales	f__Picornaviridae	g__Enterovirus	s__Rhinovirus C	t__Rhinovirus C	0.00221978	1	151	0.02115142176775459	0.9470198675496688	0.0	63103464
TAU_pos_SET8	Paslahepevirus balayani	Orthohepevirus A JMK-Gif14L genomic RNA, nearly complete genome	7218		LC406560.1	acc:LC406560.1	7218	k__Viruses	p__Kitrinoviricota	c__Alsuviricetes	o__Hepelivirales	f__Hepeviridae	g__Paslahepevirus	s__Paslahepevirus balayani	t__Paslahepevirus balayani	0.00219548	1	150	0.020781379883624274	0.86	0.0	63103464
TAU_pos_SET8	Human papillomavirus type 194	Human papillomavirus type 194 isolate ACS290	7260		KR816181.1	set:KR816181	7260	k__Viruses	p__Cossaviricota	c__Papovaviricetes	o__Zurhausenvirales	f__Papillomaviridae	g__Gammapapillomavirus	s__Human papillomavirus type 194	t__Human papillomavirus type 194	0.00218278	1	151	0.020798898071625344	0.9801324503311258	0.0	63103464
TAU_pos_SET8	Human papillomavirus 139	Human papillomavirus type 139 isolate GH1646	7360		HM999991.1	set:HM999991	7360	k__Viruses	p__Cossaviricota	c__Papovaviricetes	o__Zurhausenvirales	f__Papillomaviridae	g__Gammapapillomavirus	s__Gammapapillomavirus 7	t__Human papillomavirus 139	0.00215312	1	151	0.020516304347826086	0.9867549668874173	0.0	63103464
TAU_pos_SET8	Human papillomavirus	MAG: Human papillomavirus isolate HPV-mSK_144	7737		MH777286.2	set:MH777286	7737	k__Viruses	p__Cossaviricota	c__Papovaviricetes	o__Zurhausenvirales	f__Papillomaviridae	g__Unclassified Papillomaviridae	s__Human papillomavirus	t__Human papillomavirus	0.00204821	1	112	0.014475895049760889	0.9553571428571429	0.0	63103464
TAU_pos_SET8	Jaagsiekte sheep retrovirus	UNVERIFIED: Jaagsiekte sheep retrovirus isolate Shangri-la	7917		MZ931278.1	acc:MZ931278.1	7917	k__Viruses	p__Artverviricota	c__Revtraviricetes	o__Ortervirales	f__Retroviridae	g__Betaretrovirus	s__Jaagsiekte sheep retrovirus	t__Jaagsiekte sheep retrovirus	0.00200164	1	137	0.017304534545913856	0.9343065693430657	0.0	63103464
TAU_pos_SET8	human papillomavirus 42	Human papillomavirus 42 isolate V521R486_HPV42	7920		OP711997.1	acc:OP711997.1	7920	k__Viruses	p__Cossaviricota	c__Papovaviricetes	o__Zurhausenvirales	f__Papillomaviridae	g__Alphapapillomavirus	s__Alphapapillomavirus 1	t__human papillomavirus 42	0.00200088	1	145	0.018308080808080808	0.993103448275862	0.0	63103464
TAU_pos_SET8	Simian retrovirus 2	Simian retrovirus 2 strain SRV2/TEX/2016/V1	8106		MF805807.1	acc:MF805807.1	8106	k__Viruses	p__Artverviricota	c__Revtraviricetes	o__Ortervirales	f__Retroviridae	g__Betaretrovirus	s__Mason-Pfizer monkey virus	t__Simian retrovirus 2	0.00195497	1	136	0.01677769553417222	0.9191176470588235	0.0	63103464
TAU_pos_SET8	Human betaherpesvirus 7	Human herpesvirus 7	153080		NC_001716.2	GCF_000848125.1	153080	k__Viruses	p__Peploviricota	c__Herviviricetes	o__Herpesvirales	f__Orthoherpesviridae	g__Roseolovirus	s__Roseolovirus humanbeta7	t__Human betaherpesvirus 7	0.00113873	11	369	0.010184217402665273	1.0	0.0	63103464
TAU_pos_SET8	Human respiratory syncytial virus A	Human respiratory syncytial virus A strain hRSV/A/ZAF/UFS-NGS-UNIT/SARI-35/20212021-03-02	15171		PP784978.1	acc:PP784978.1	15171	k__Viruses	p__Negarnaviricota	c__Monjiviricetes	o__Mononegavirales	f__Pneumoviridae	g__Orthopneumovirus	s__Orthopneumovirus hominis	t__Human respiratory syncytial virus A	0.00104456	1	151	0.009953200184562652	0.9867549668874173	0.0	63103464
TAU_pos_SET8	Human alphaherpesvirus 1	UNVERIFIED: Human alphaherpesvirus 1 strain B^3x1.1B	153542		ON783215.1	acc:ON783215.1	153542	k__Viruses	p__Peploviricota	c__Herviviricetes	o__Herpesvirales	f__Orthoherpesviridae	g__Simplexvirus	s__Simplexvirus humanalpha1	t__Human alphaherpesvirus 1	0.000412838	4	302	0.003927264201326022	0.9651545253863134	0.0	63103464
TAU_pos_SET8	Gallid alphaherpesvirus 3	Gallid herpesvirus 3 strain SB-1	165994		NC_075702.1	GCF_008792185.1	165994	k__Viruses	p__Peploviricota	c__Herviviricetes	o__Herpesvirales	f__Orthoherpesviridae	g__Mardivirus	s__Mardivirus gallidalpha3	t__Gallid alphaherpesvirus 3	0.000381869	4	366	0.0030242056941817176	0.99179094714809	0.0	63103464
TAU_pos_SET8	pteropodid alphaherpesvirus 2	Pteropus lylei-associated alphaherpesvirus DNA	144008		NC_076965.1	GCF_027938855.1	144008	k__Viruses	p__Peploviricota	c__Herviviricetes	o__Herpesvirales	f__Orthoherpesviridae	g__Simplexvirus	s__Simplexvirus pteropodidalpha2	t__pteropodid alphaherpesvirus 2	0.000330127	3	162	0.00313871451586023	0.9580573951434879	0.0	63103464
